# Supplementary material for: Efficient synthesis of carbazoles via PtCl2-catalyzed RT cyclization of 1-(indol-2-yl)-2,3-allenols: scope and mechanism
Source: Royal Society of Chemistry journal article supplement (doi:10.1039/c1ob06474f), 2011-10-12

**Efficient Synthesis of Carbazoles via PtCl<sub>2</sub>-Catalyzed RT  
Cyclization of 1-(Indol-2-yl)-2,3-allenols: Scope and Mechanism**

Wangqing Kong, Chunling Fu, and Shengming Ma\*

Laboratory of Molecular Recognition and Synthesis, Department of Chemistry,  
Zhejiang University, Hangzhou 310027, Zhejiang, People's Republic of China

Fax: (+86) 21-62609305

E-mail: [masm@sioc.ac.cn](mailto:masm@sioc.ac.cn)

**Supporting Information**

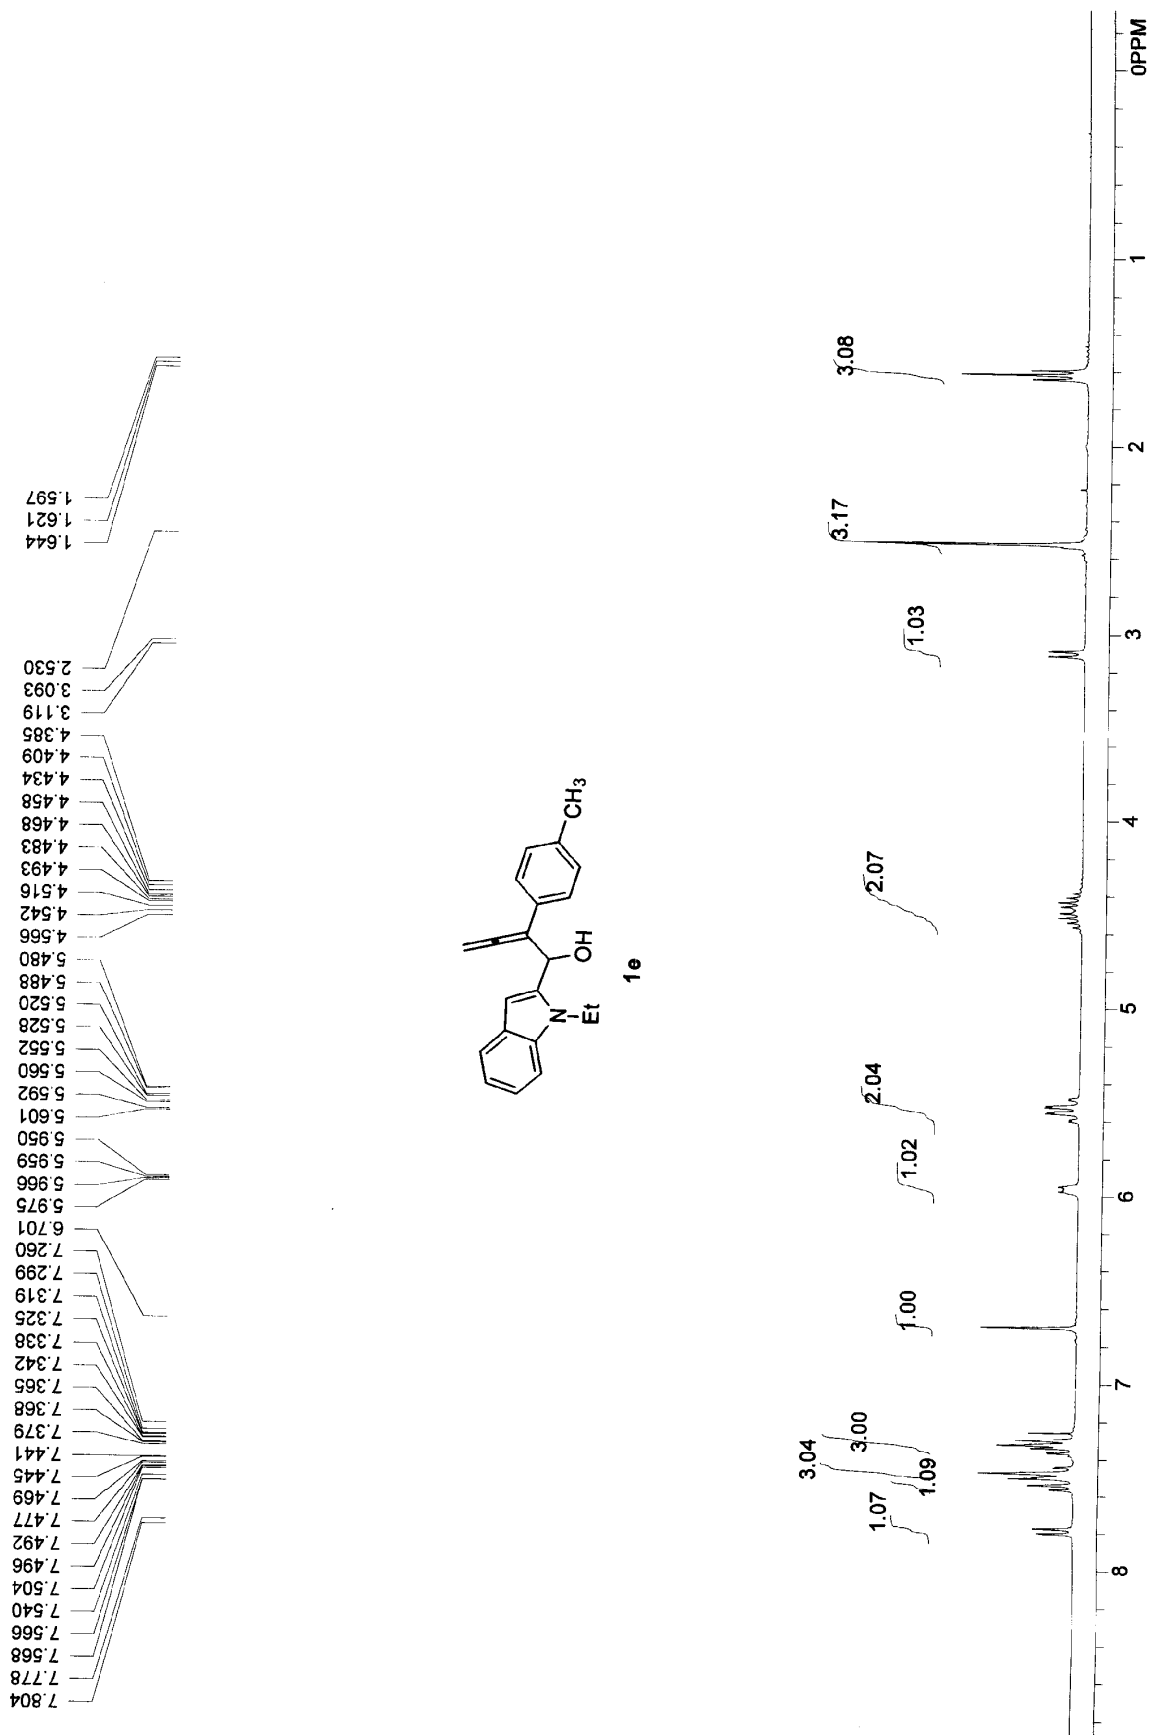

15.387

21.006

38.340

65.089

76.580

77.000

77.430

82.568

101.613

108.990

109.308

119.319

121.007

121.773

126.320

127.209

129.172

136.913

137.010

139.341

207.048

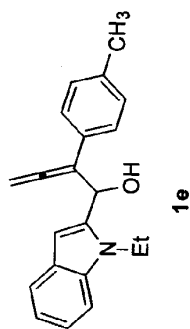

kwq-10-171

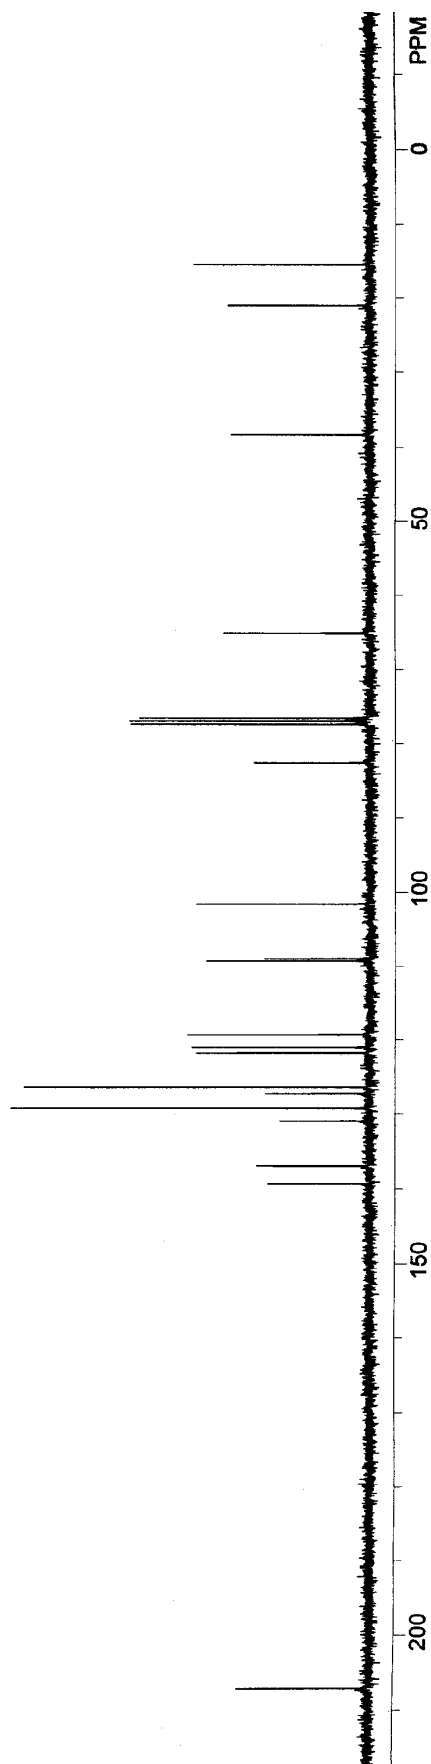

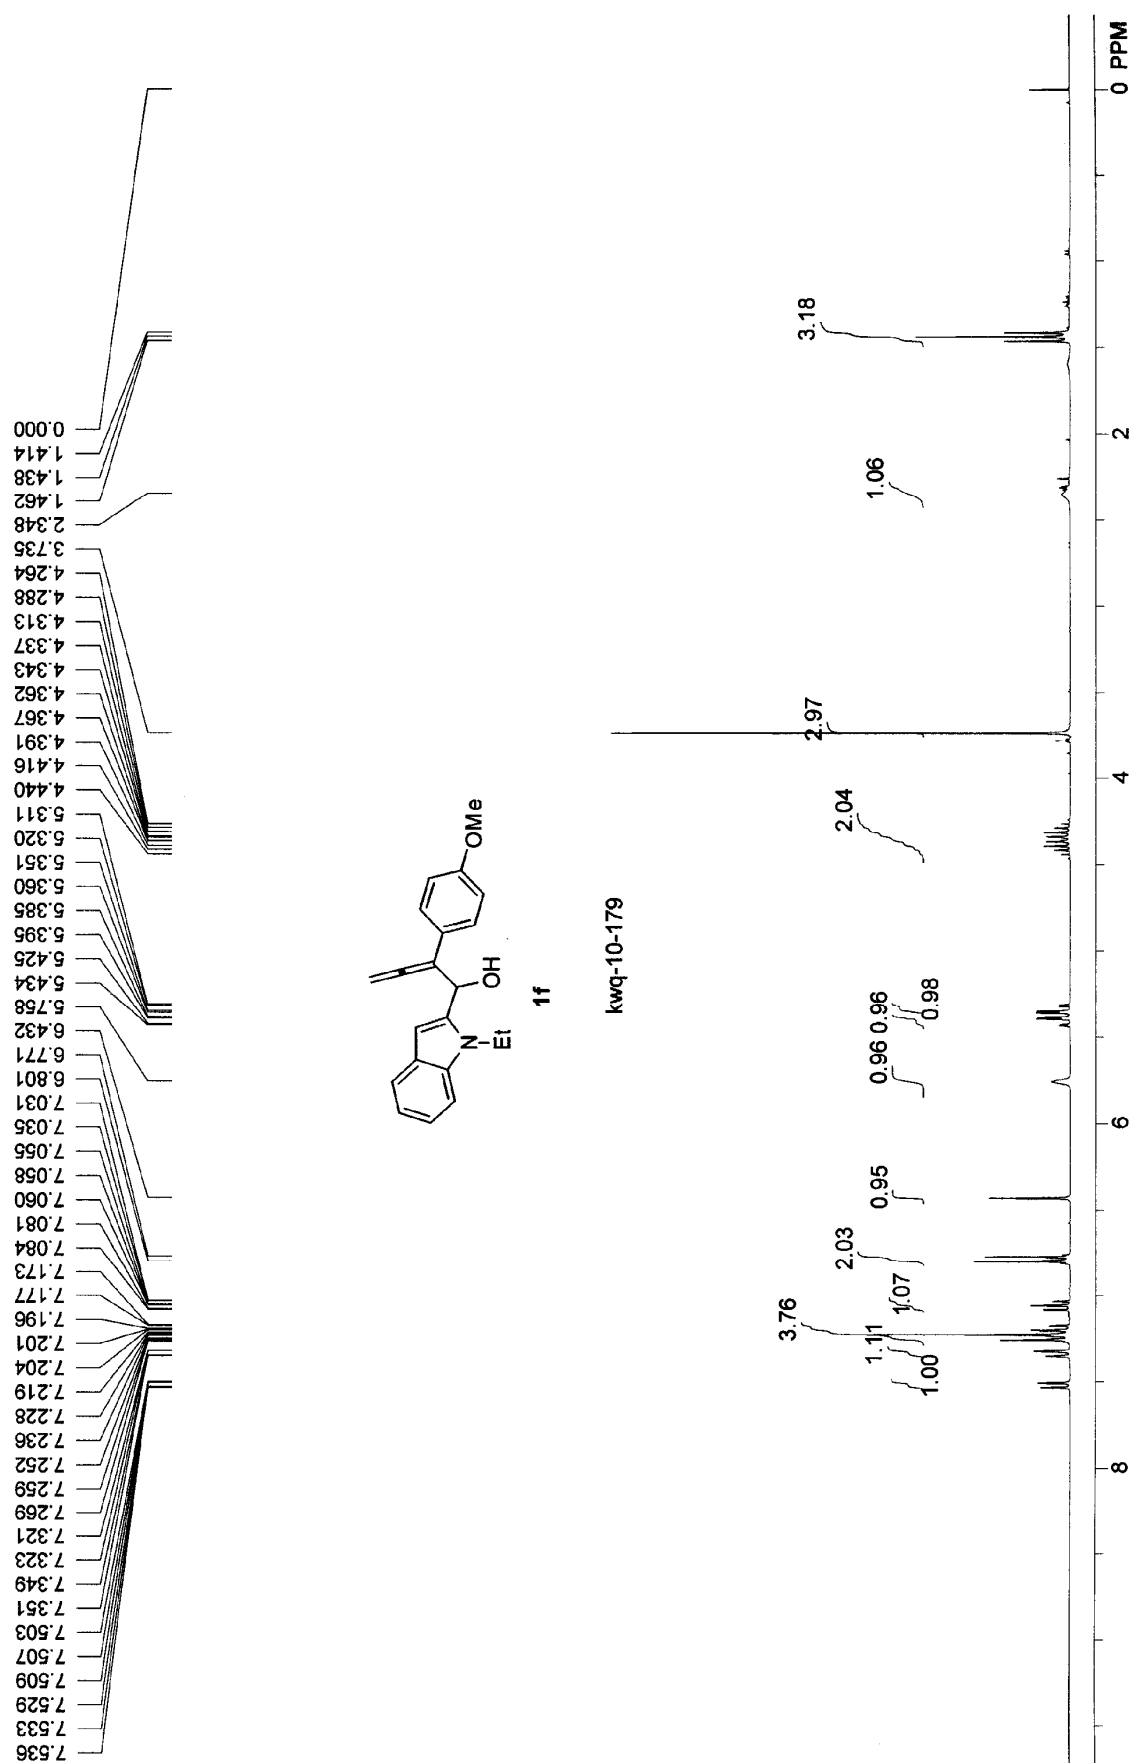

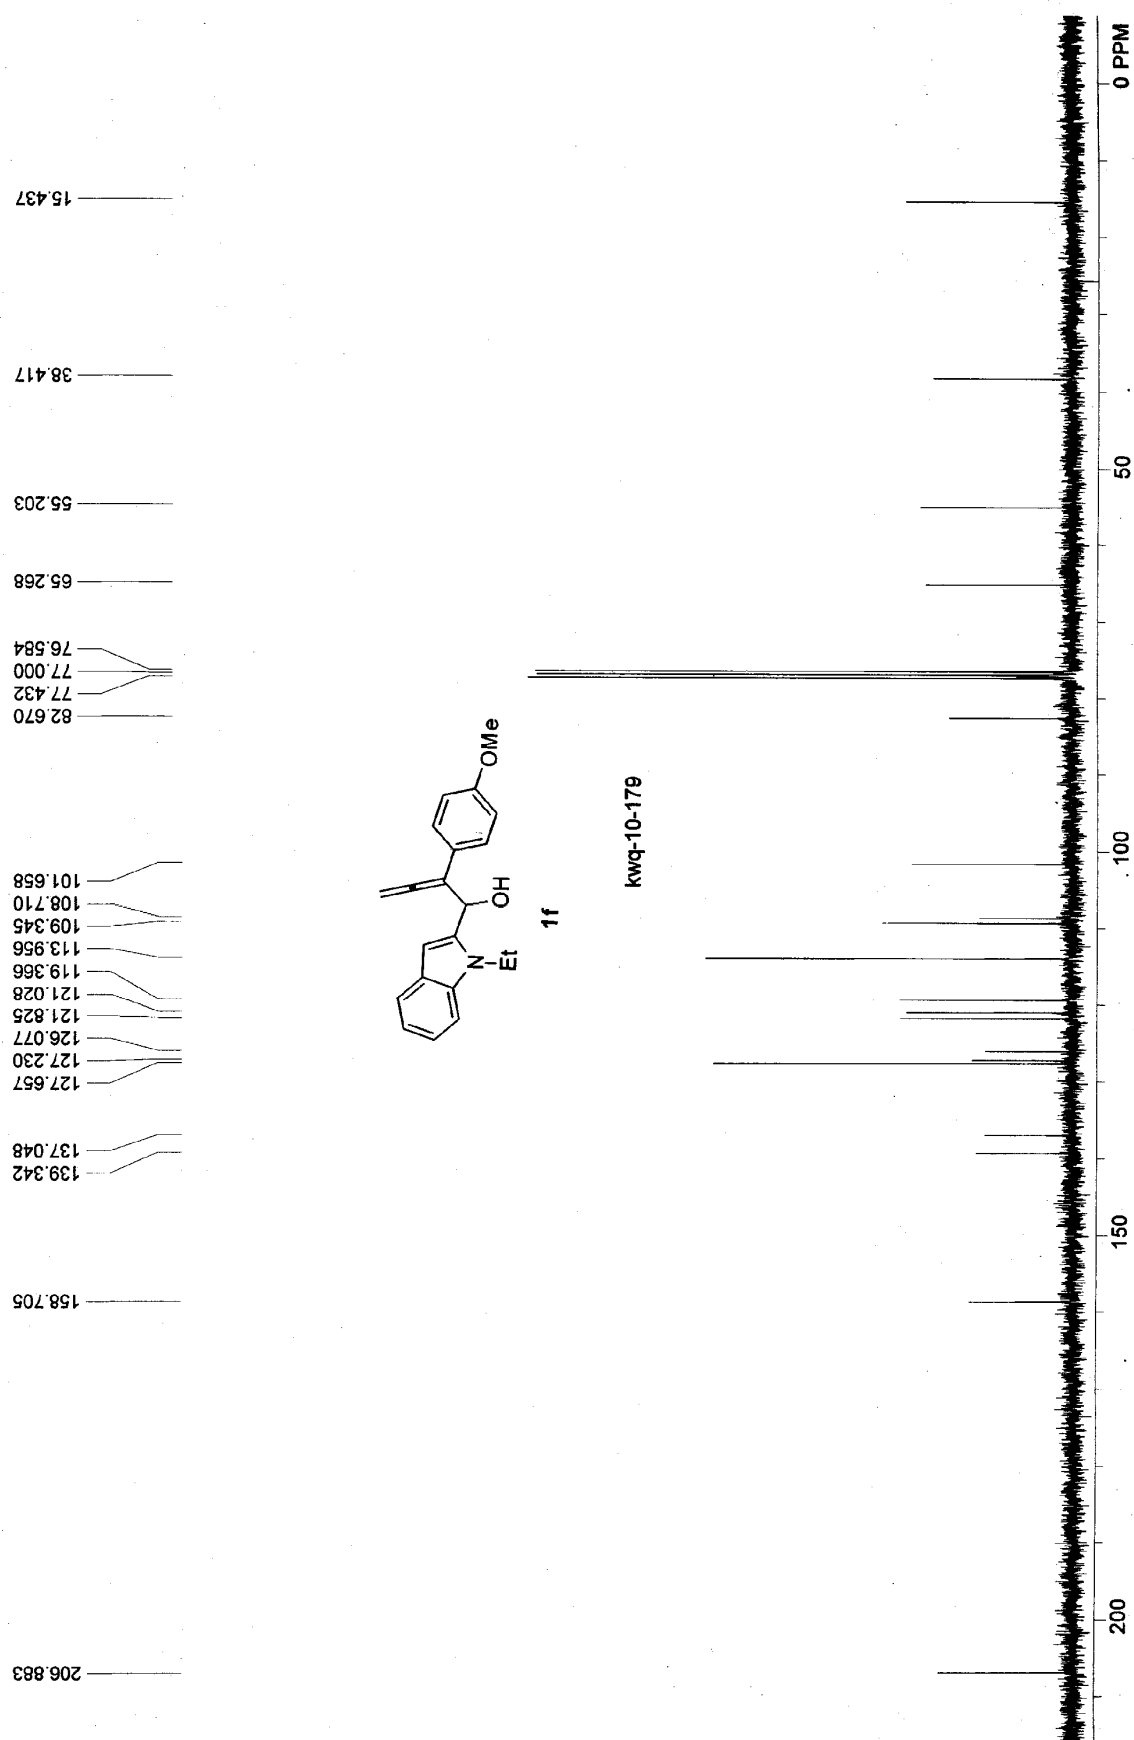

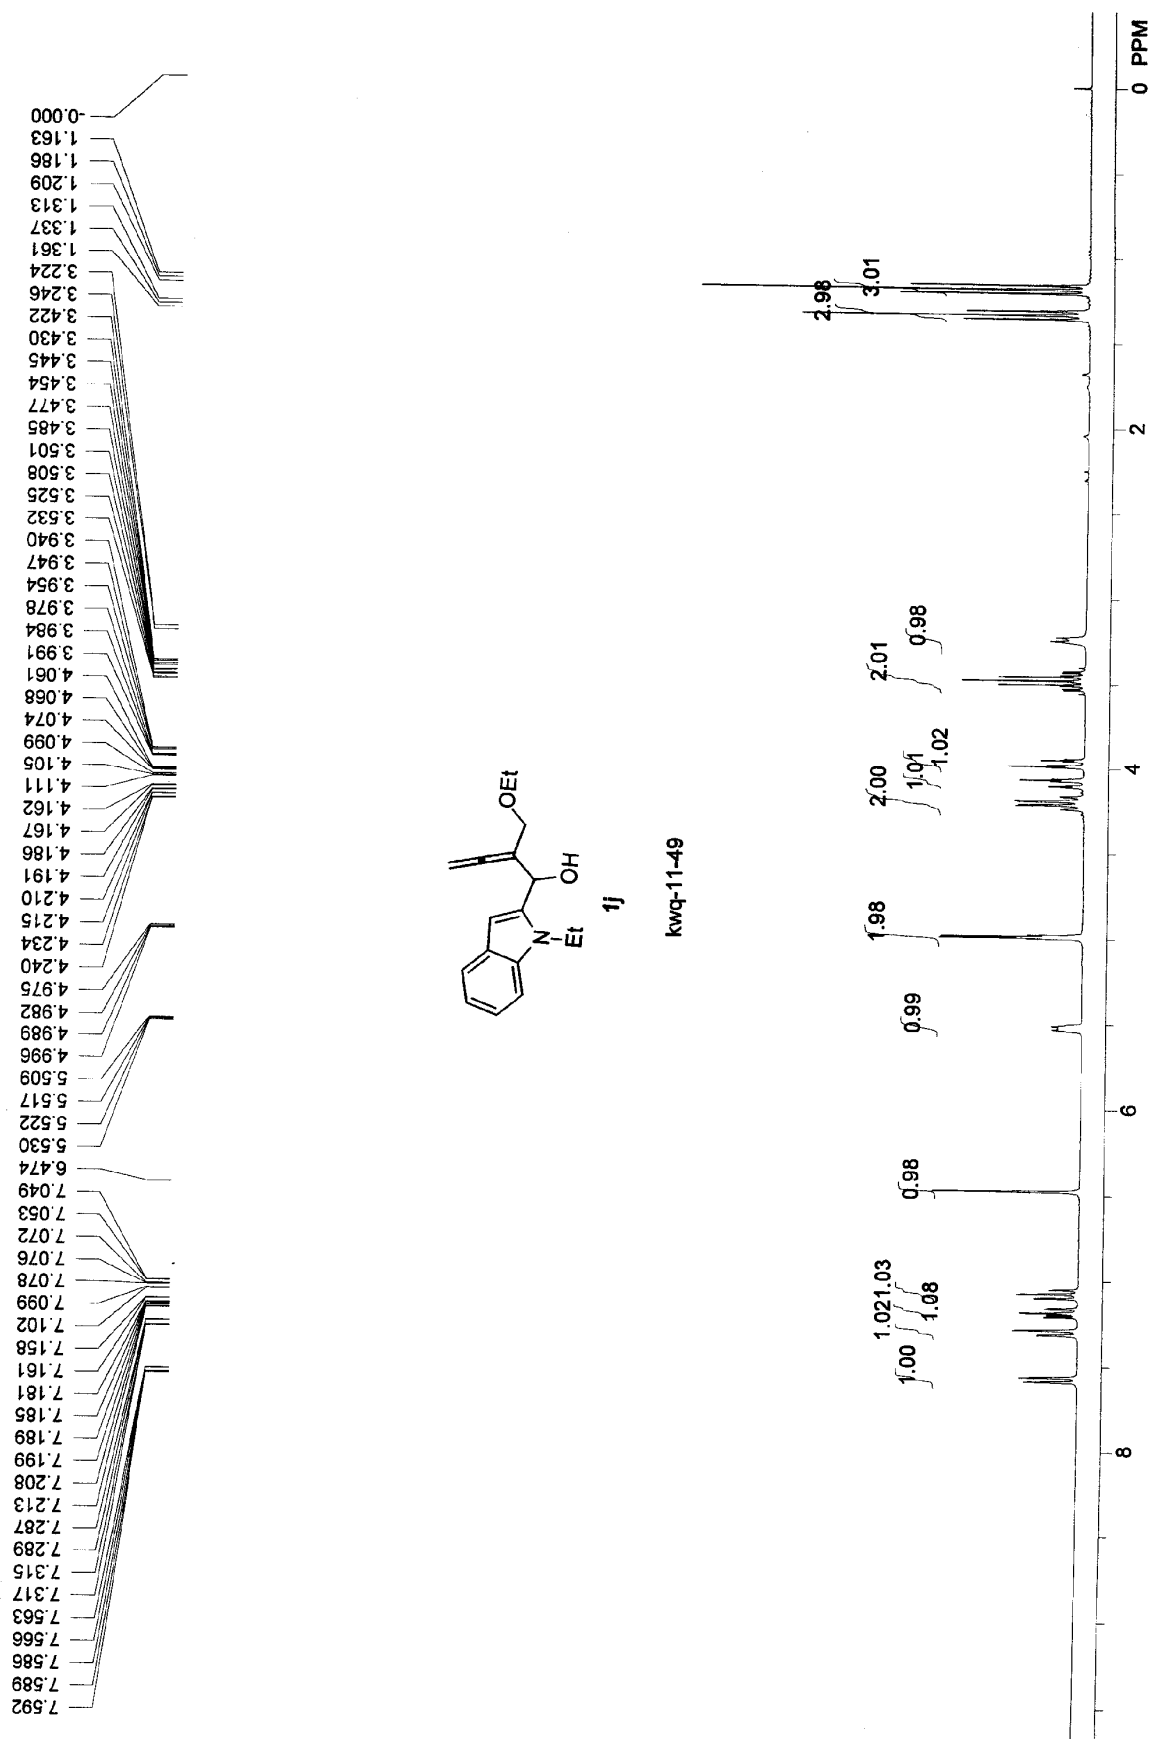

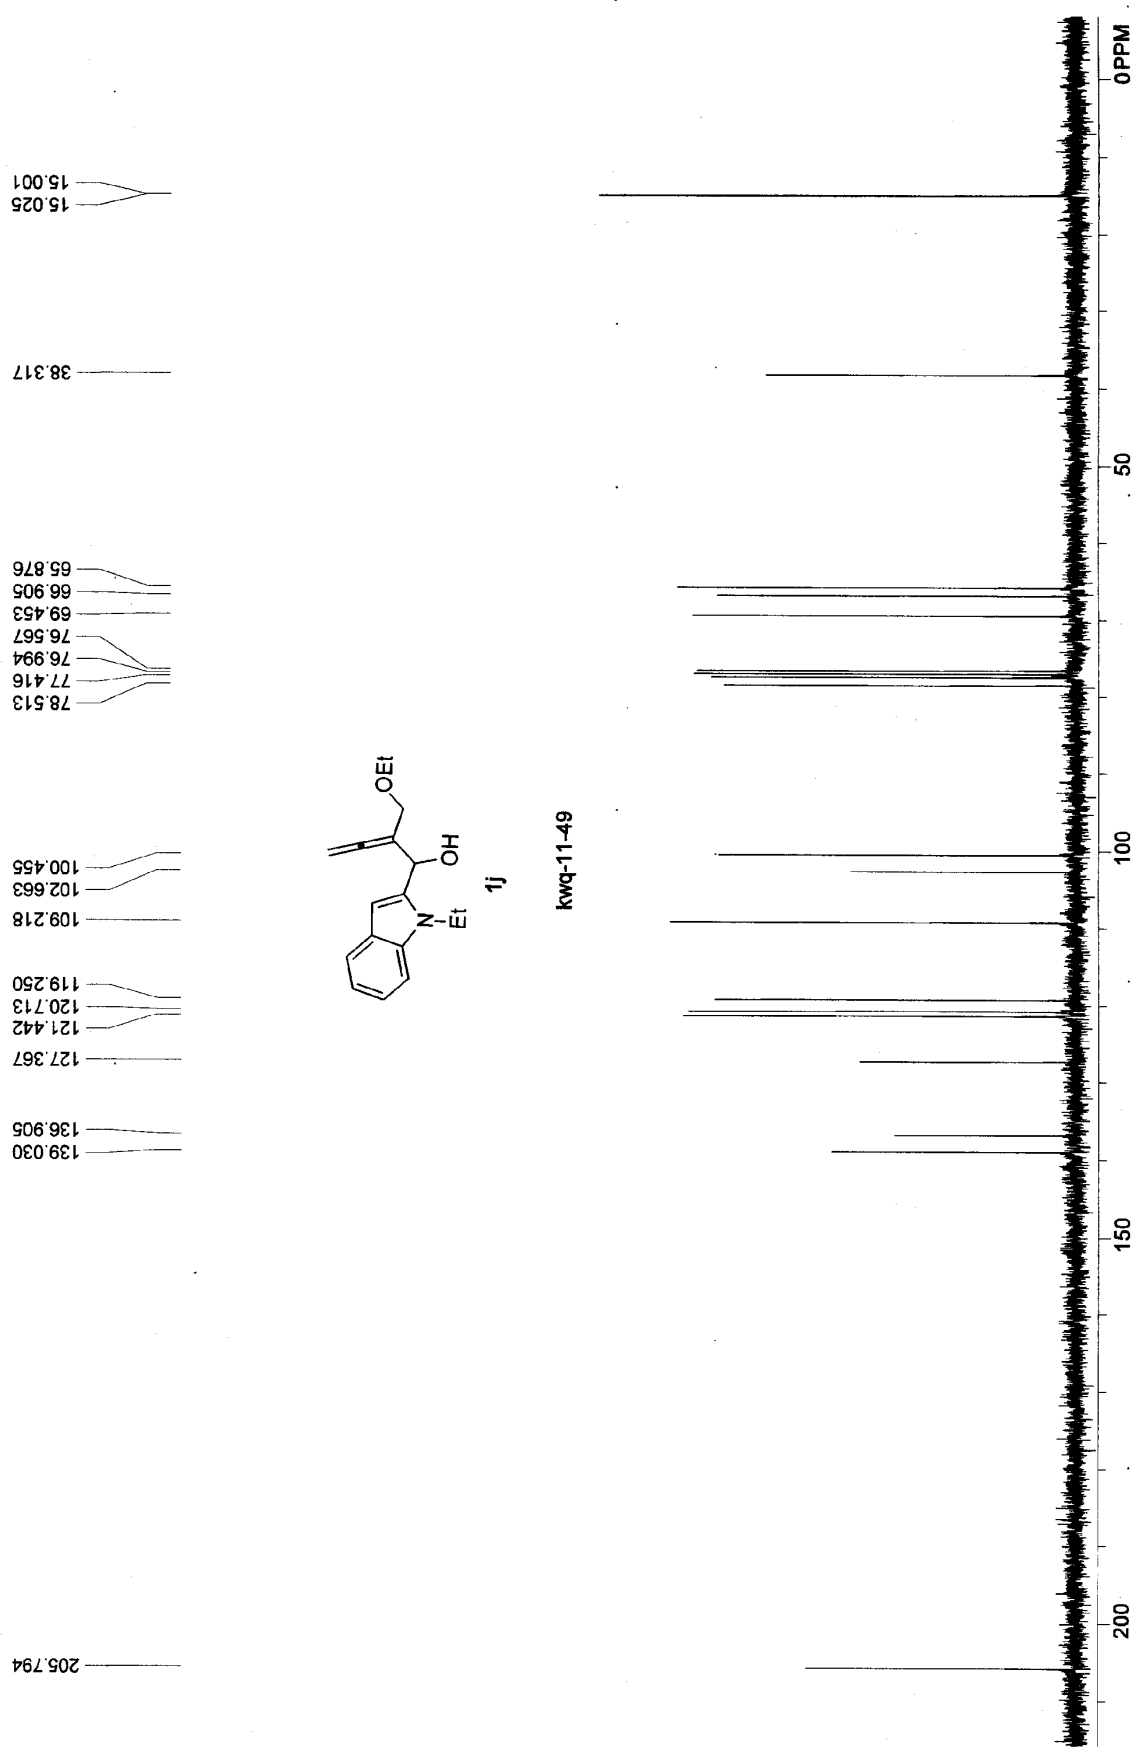

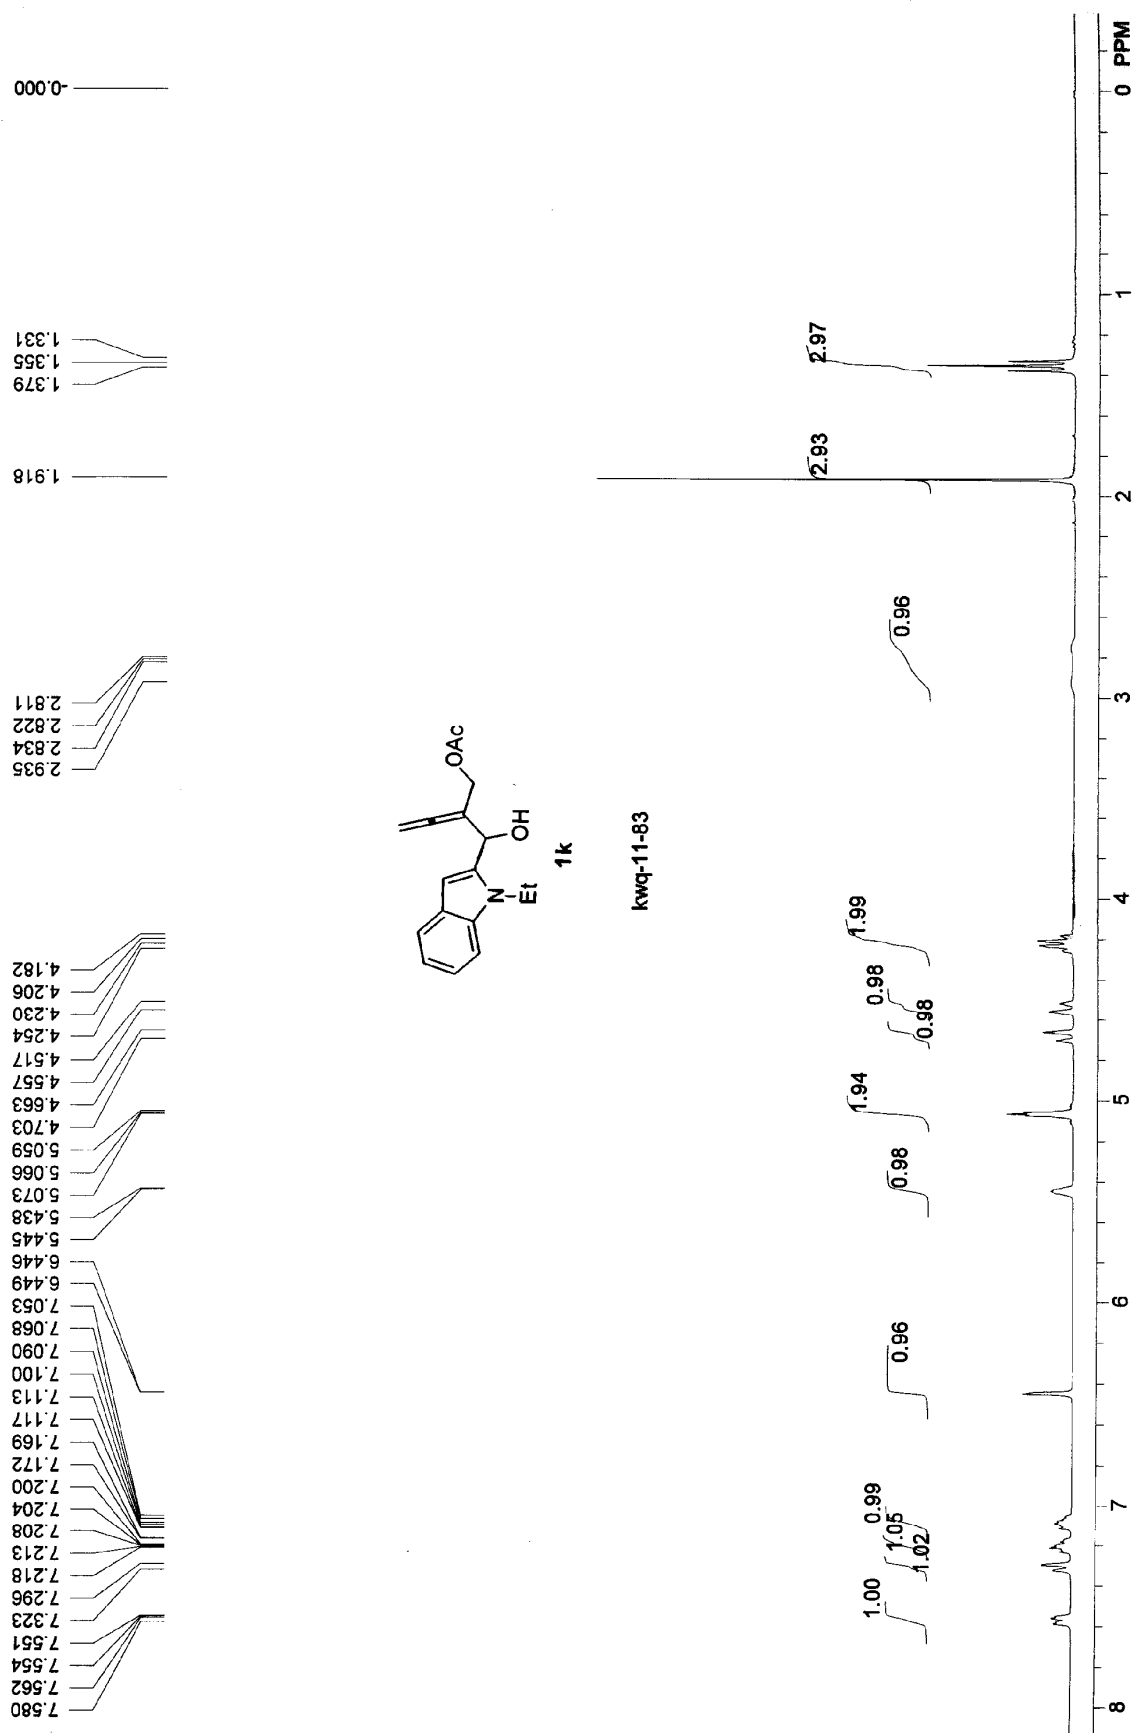



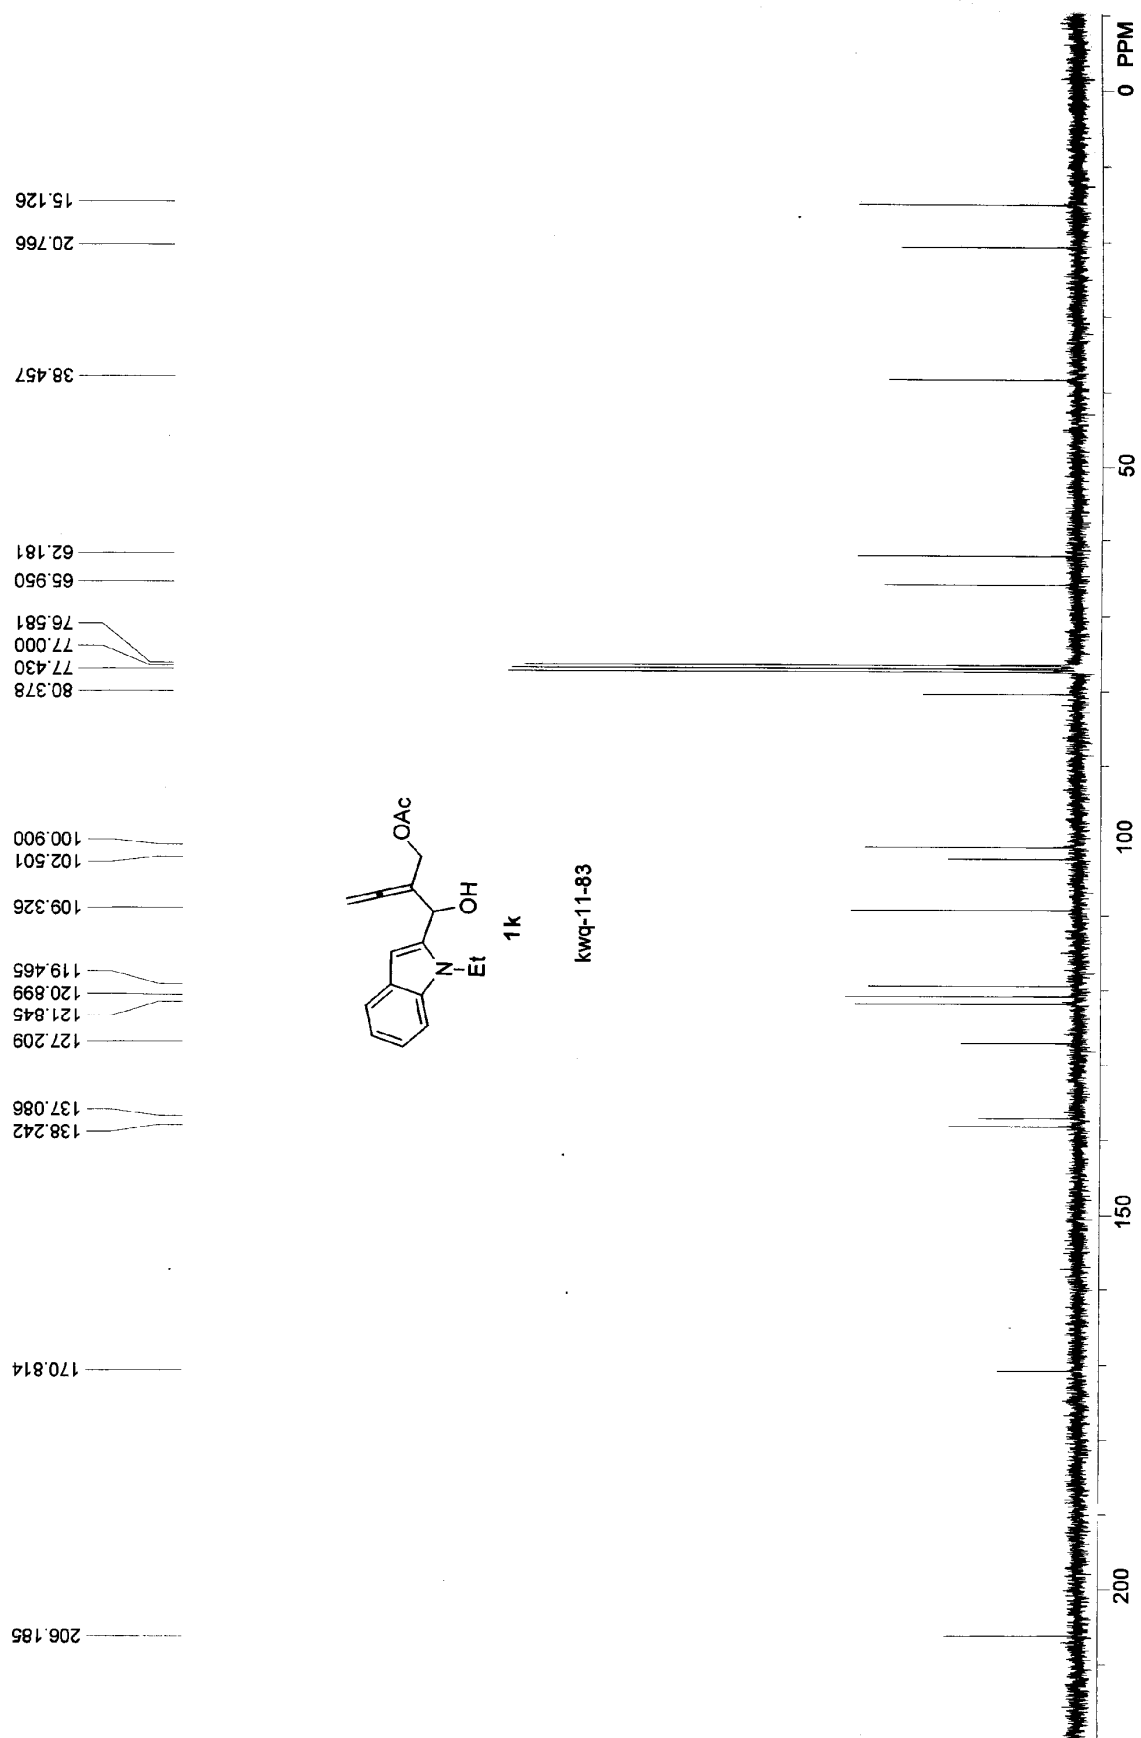

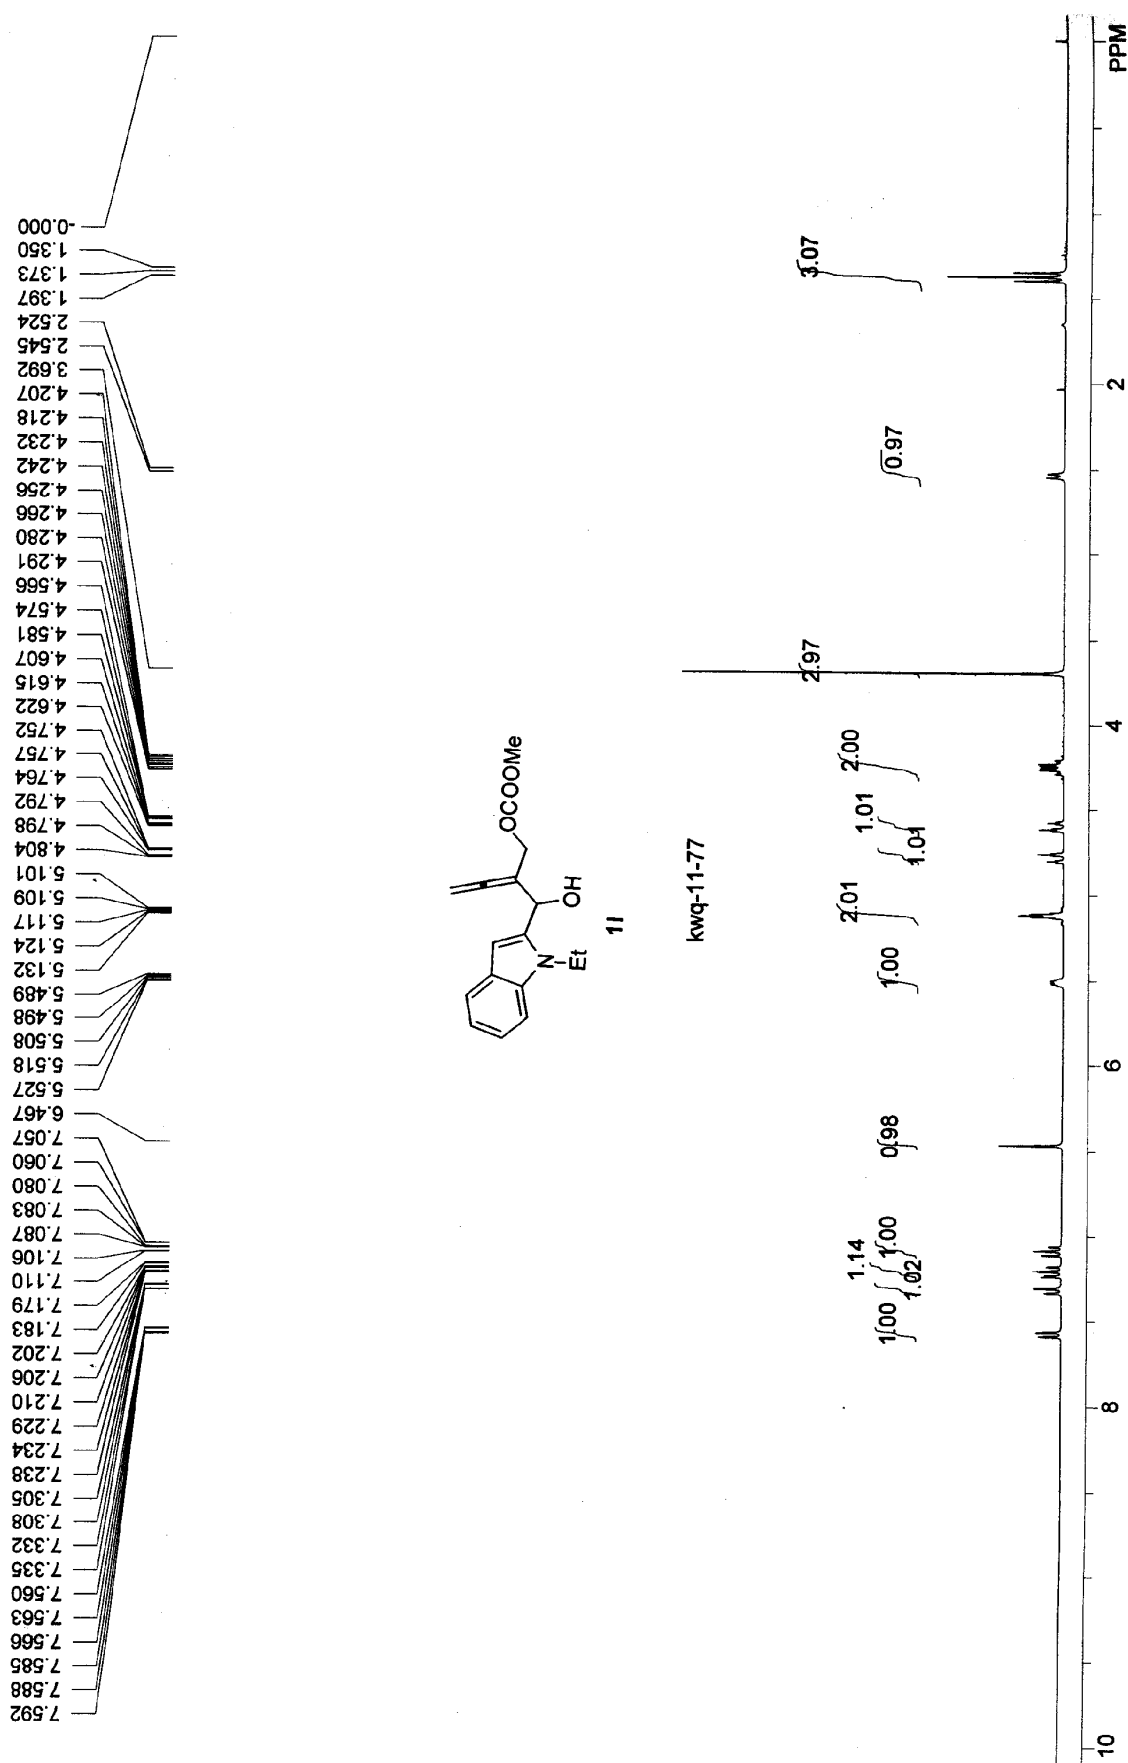

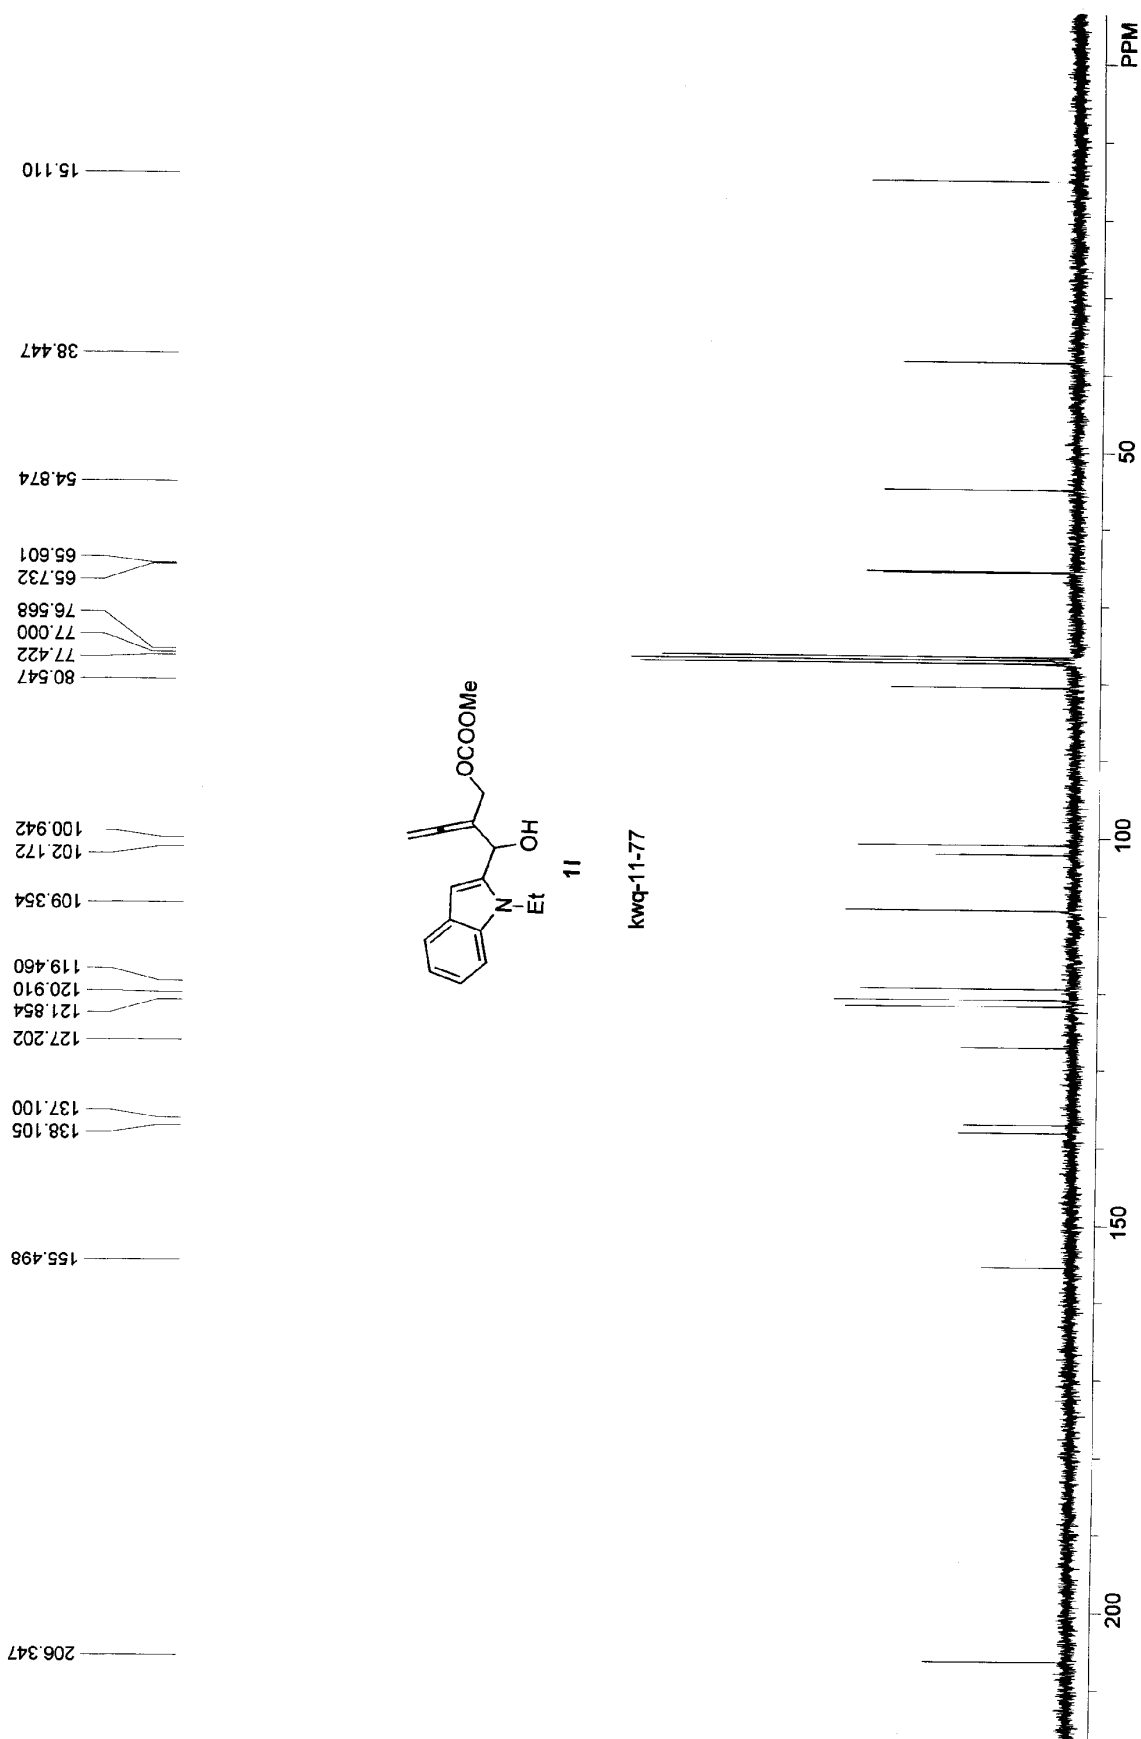

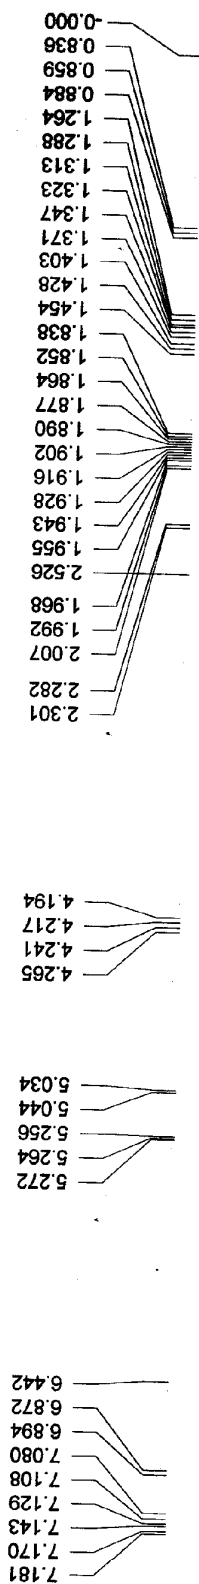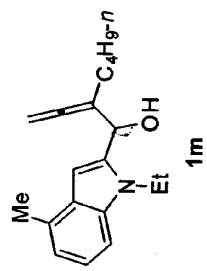

kwq-10-183

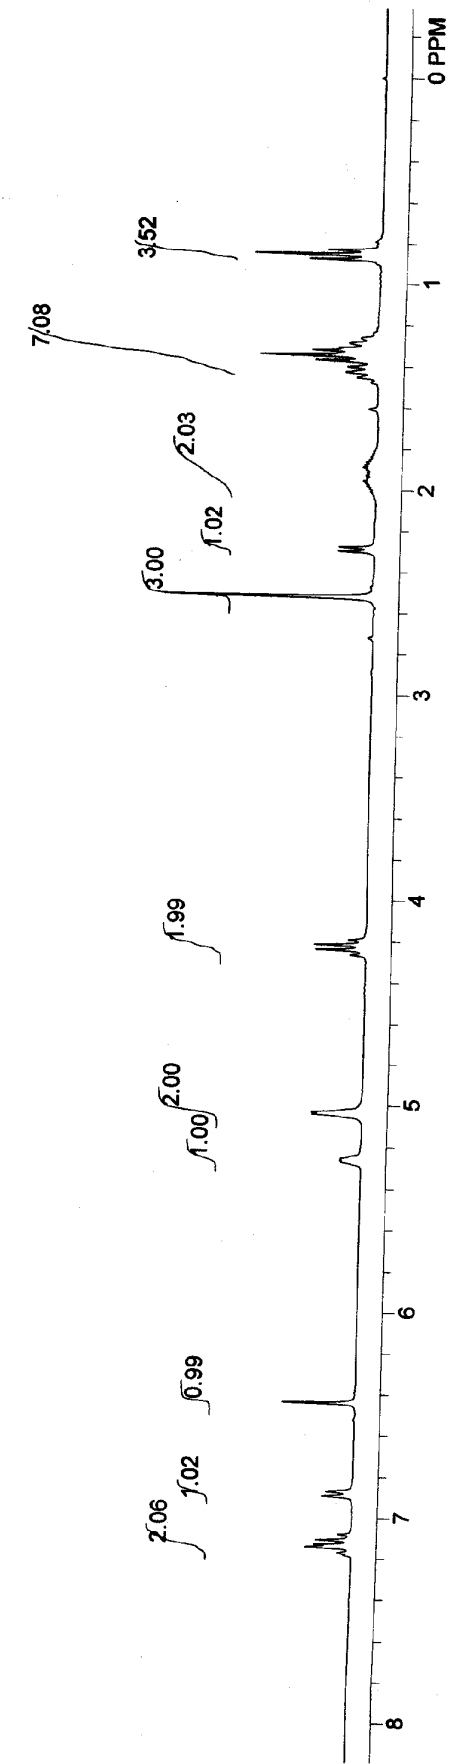

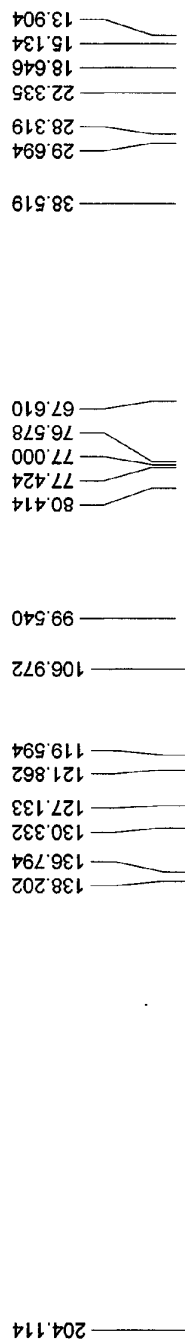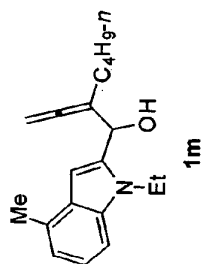

kwq-10-183

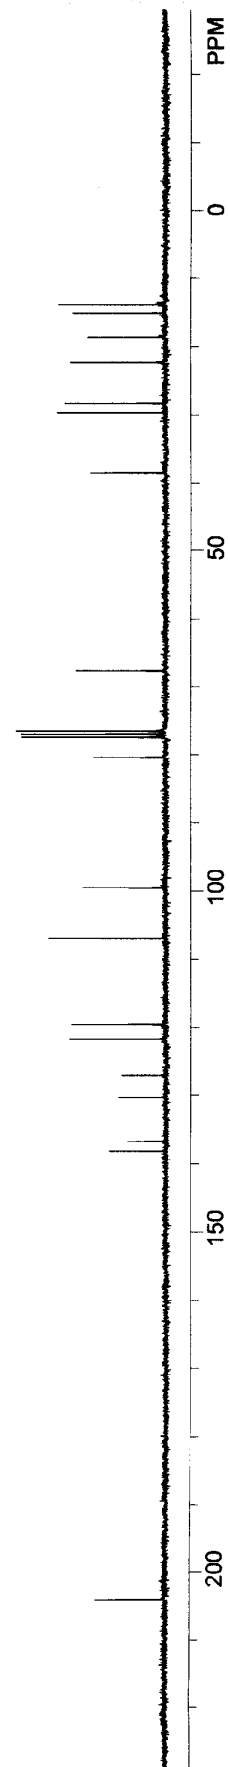

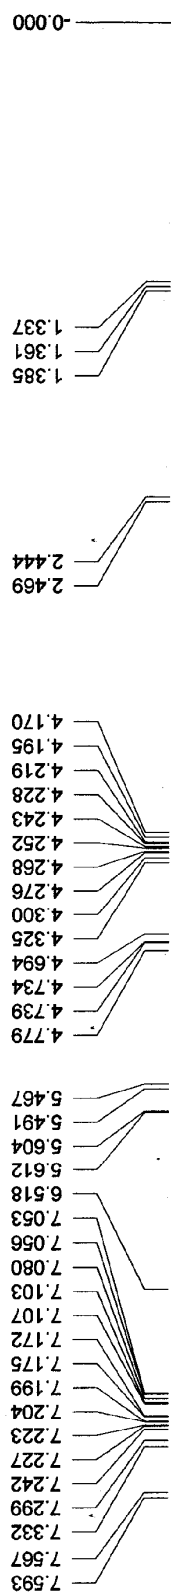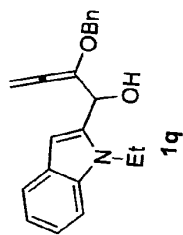

kwq-12-33

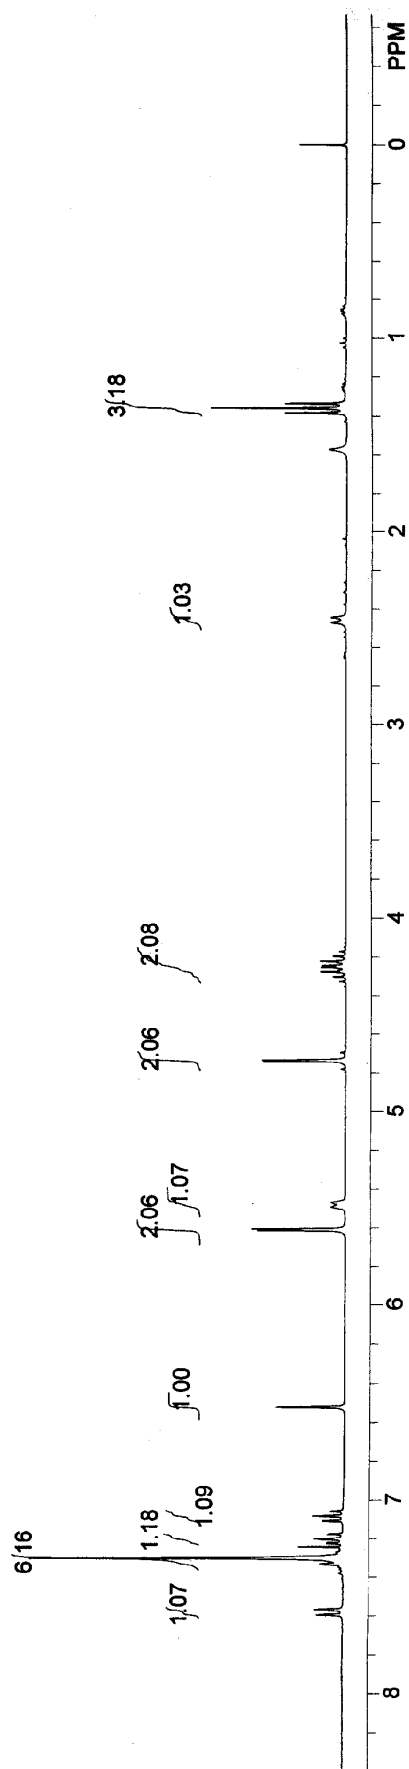

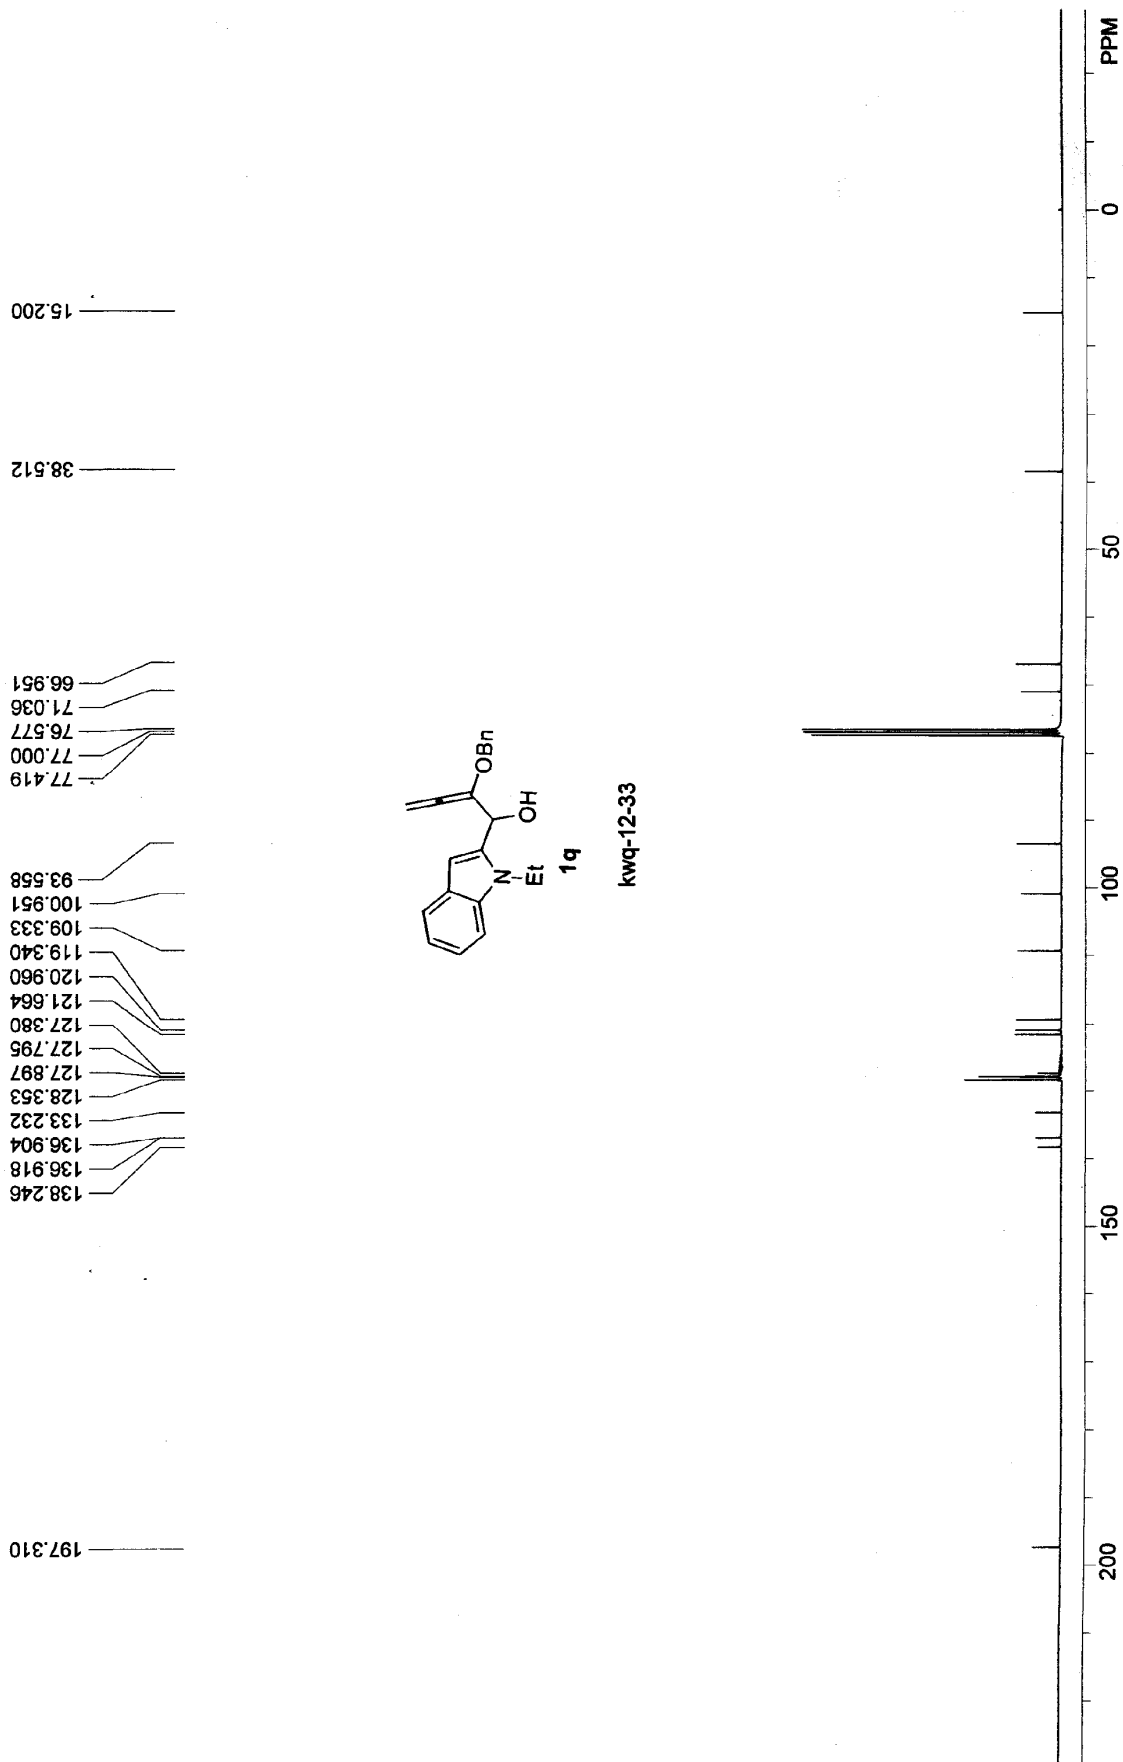

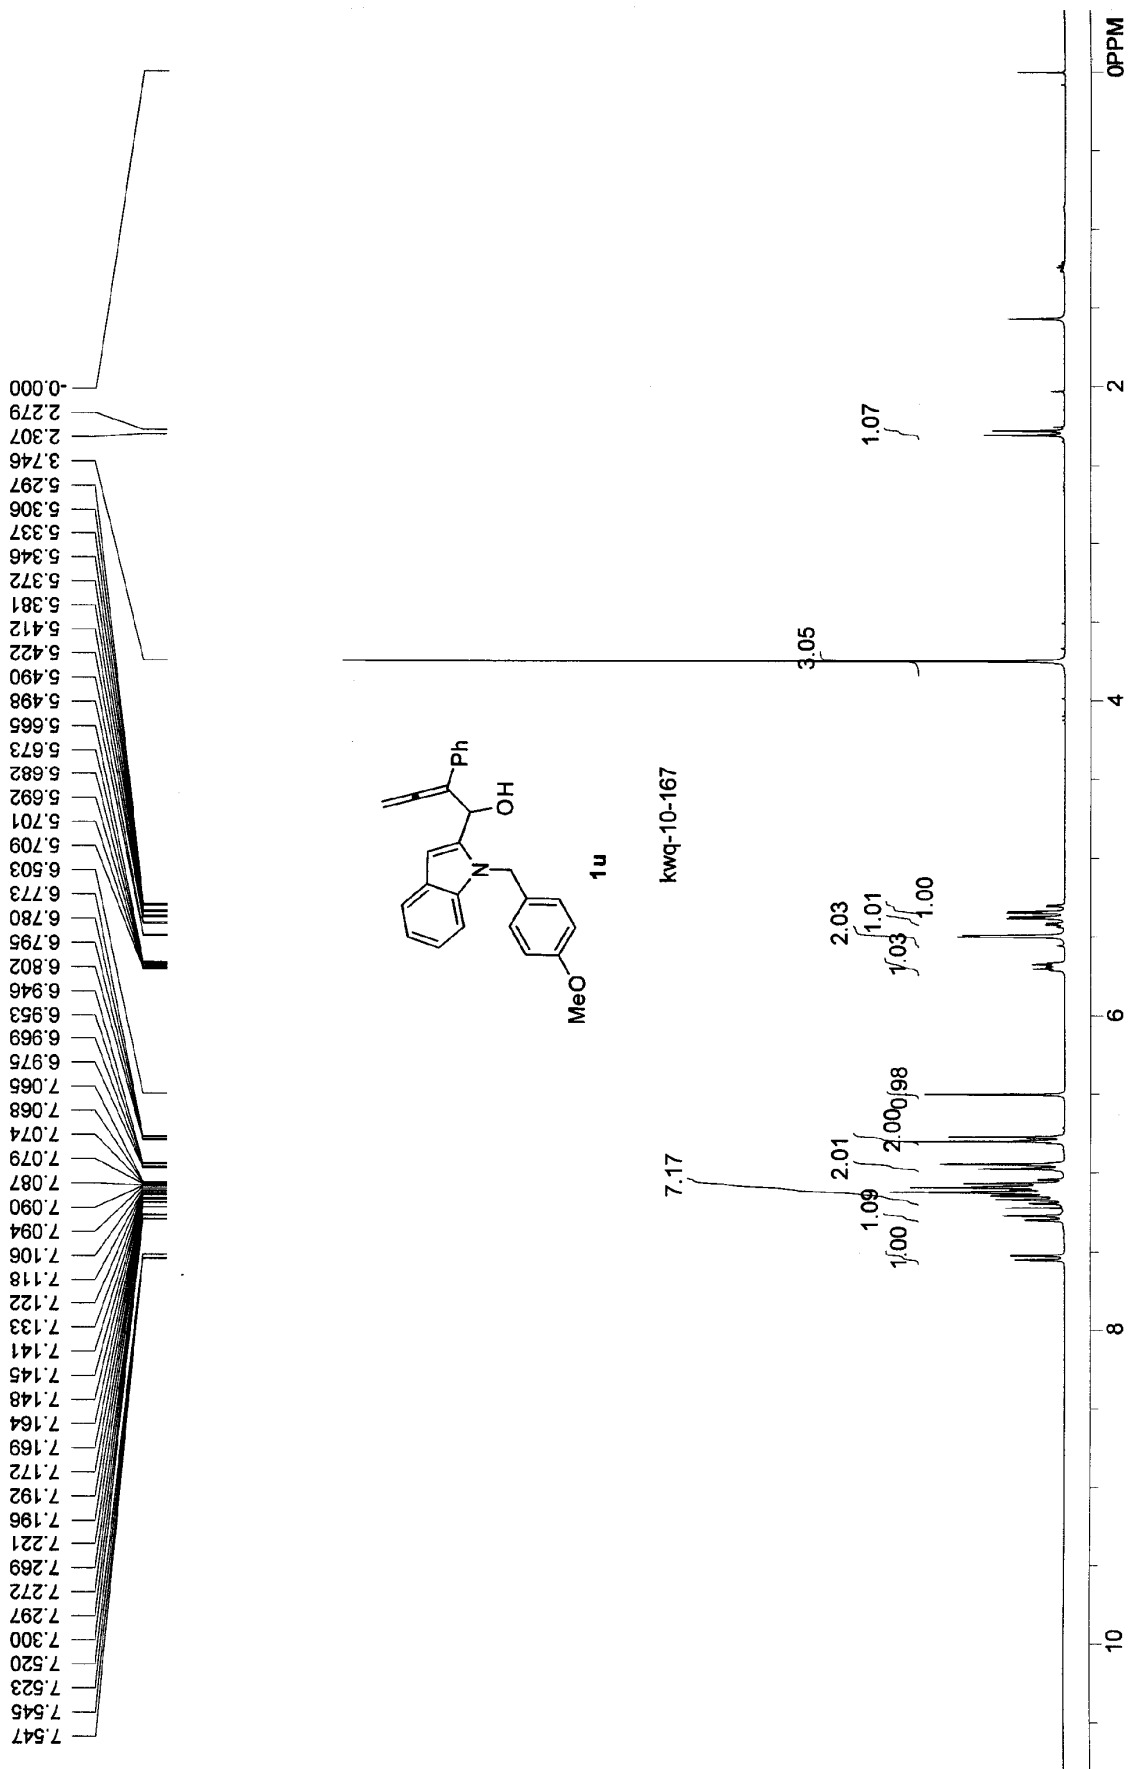



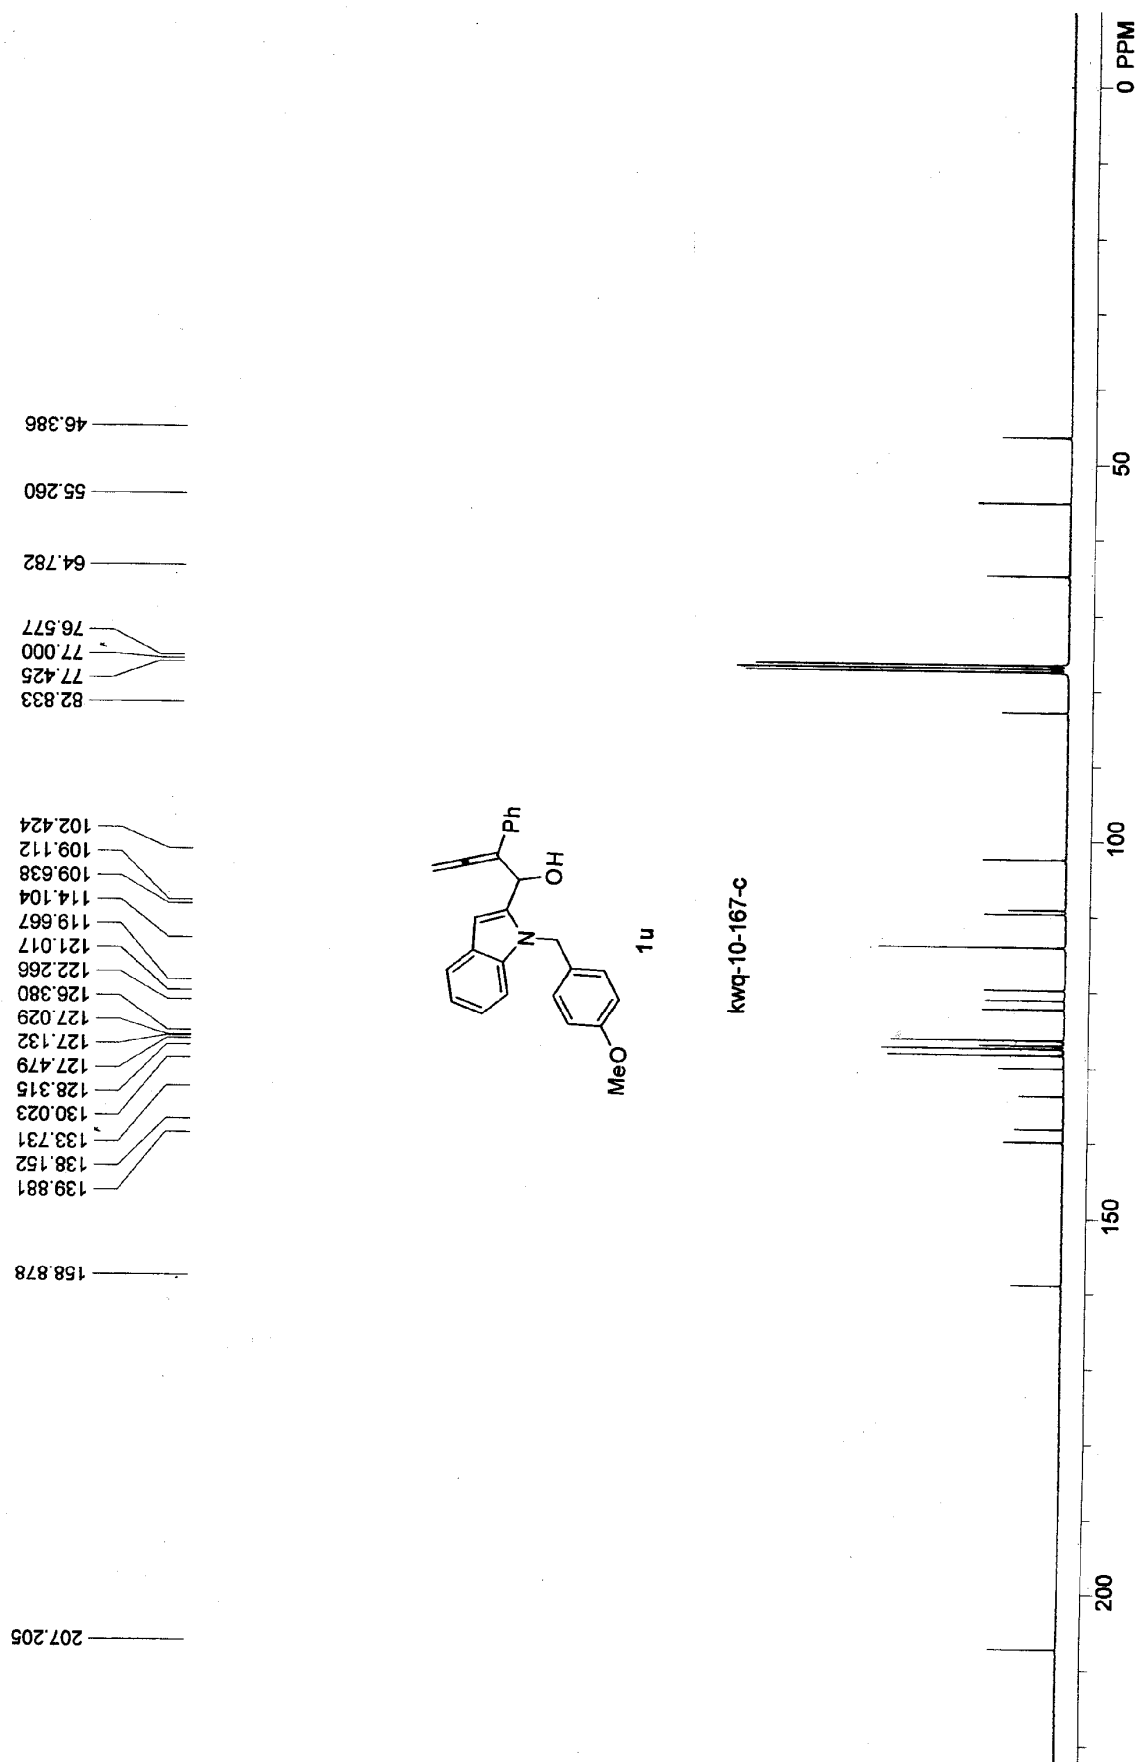

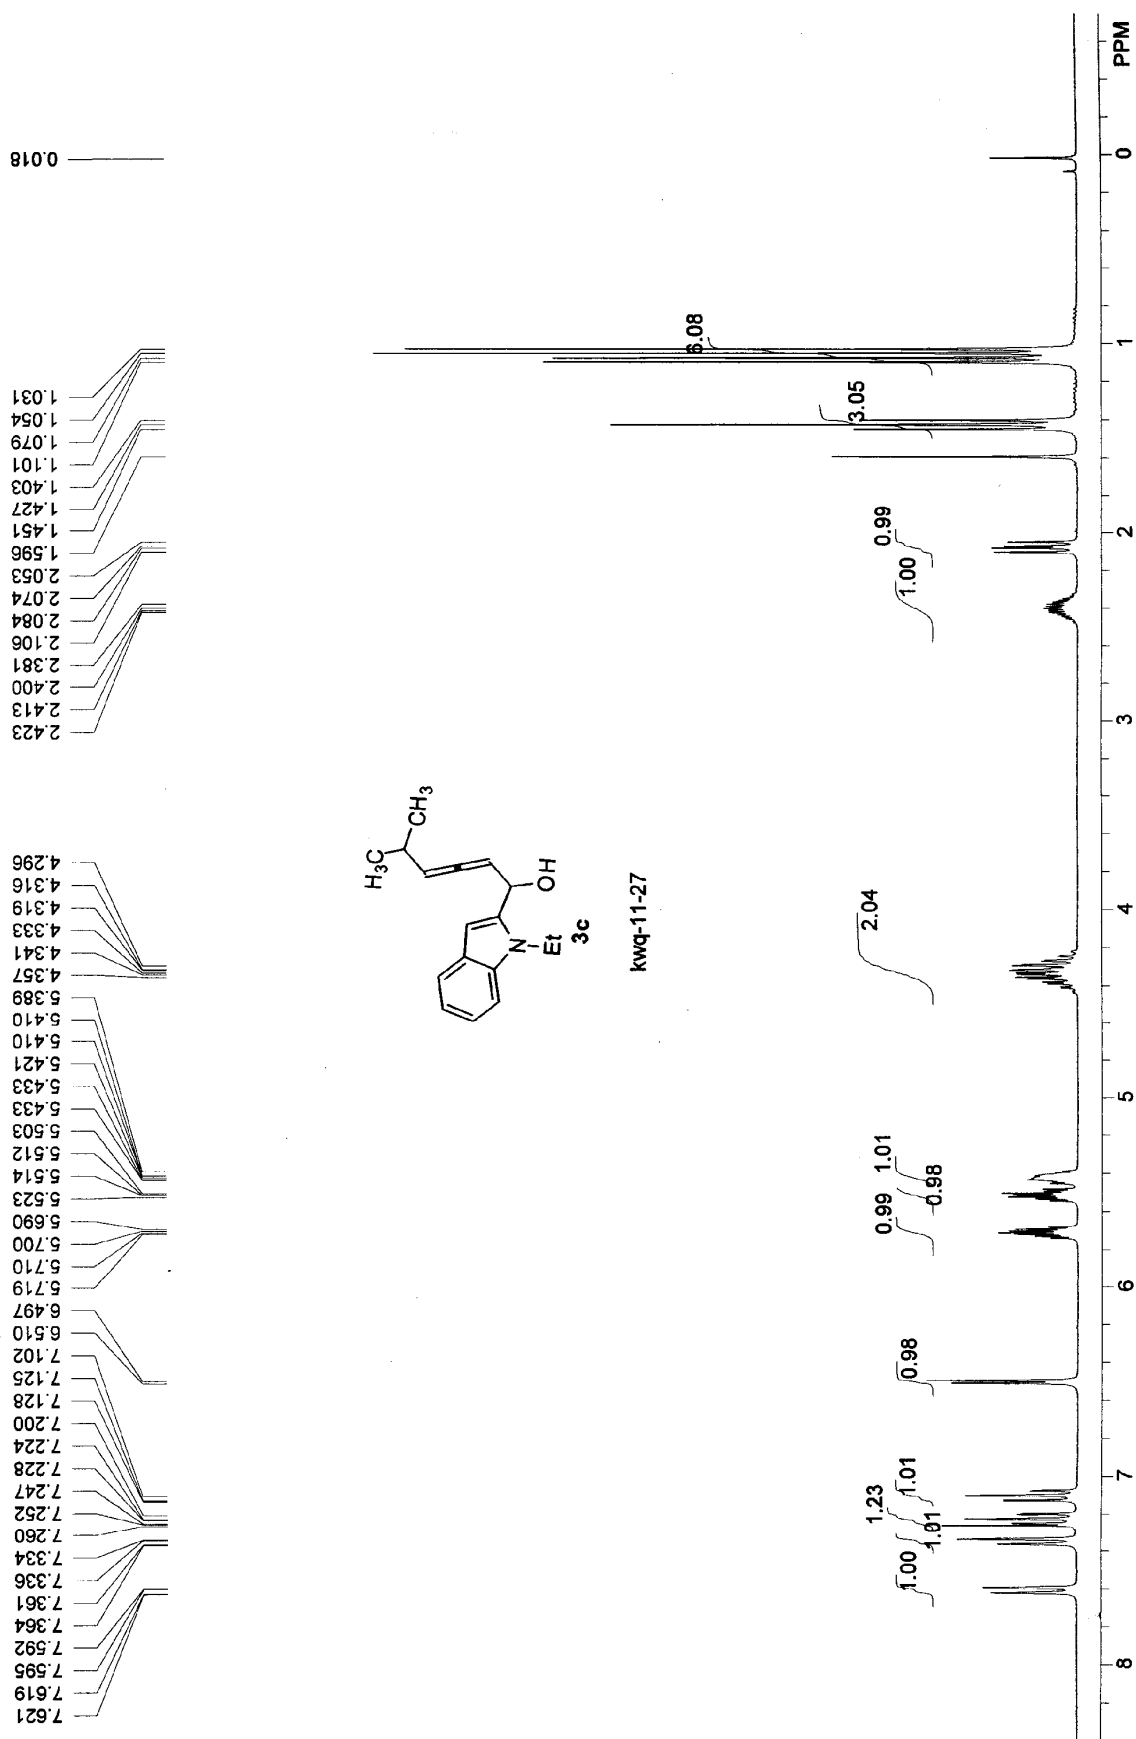

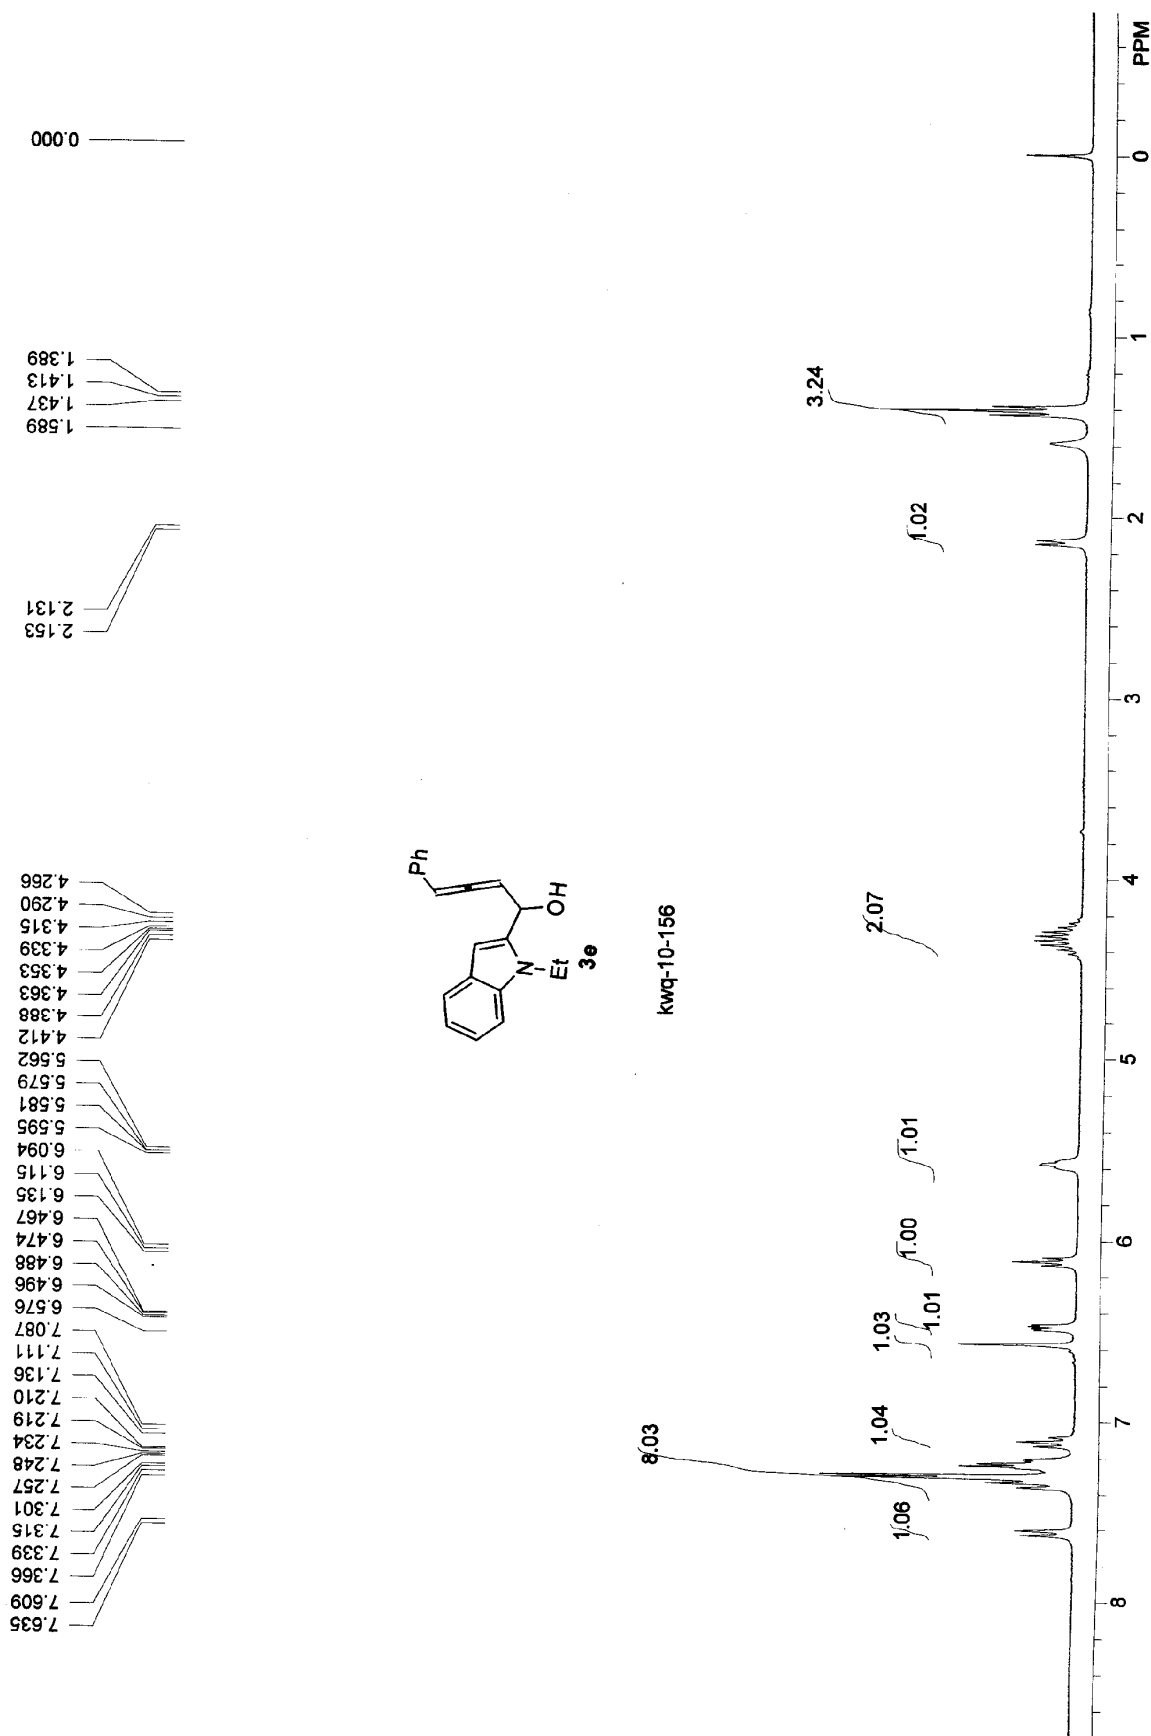

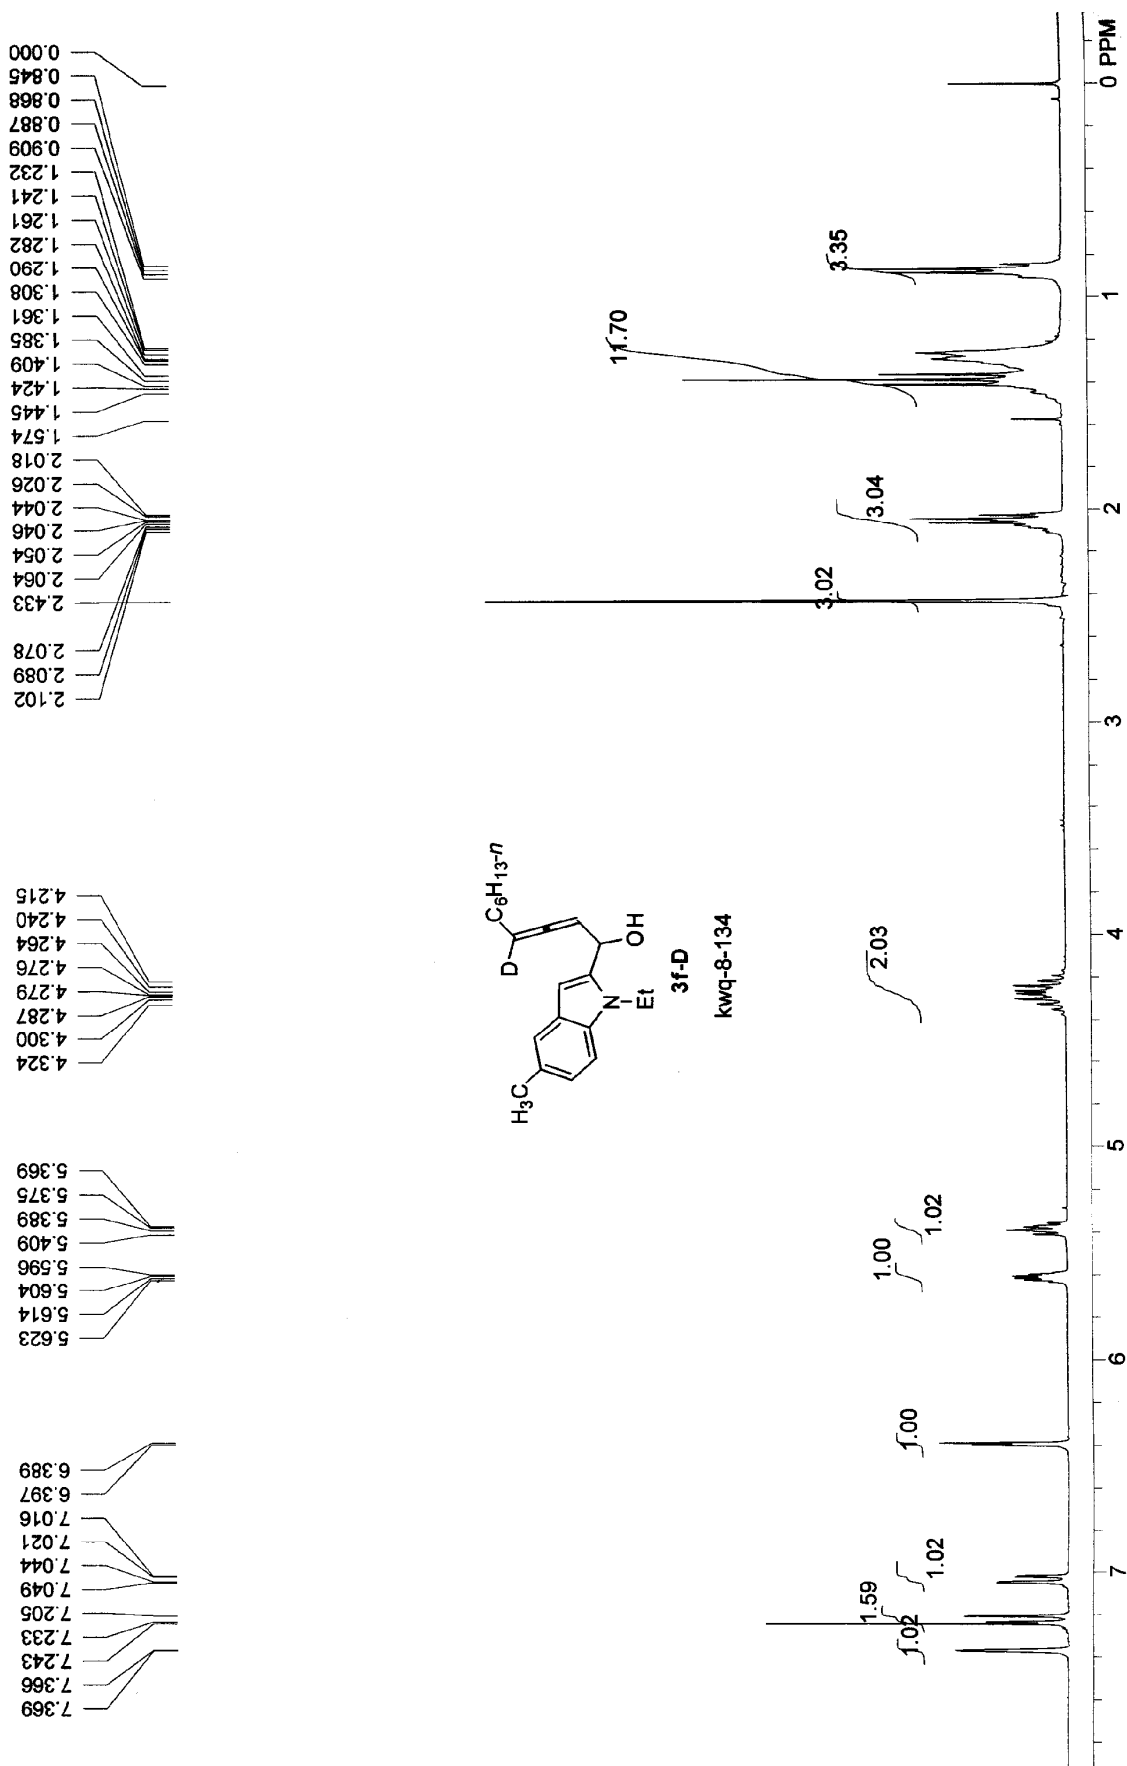

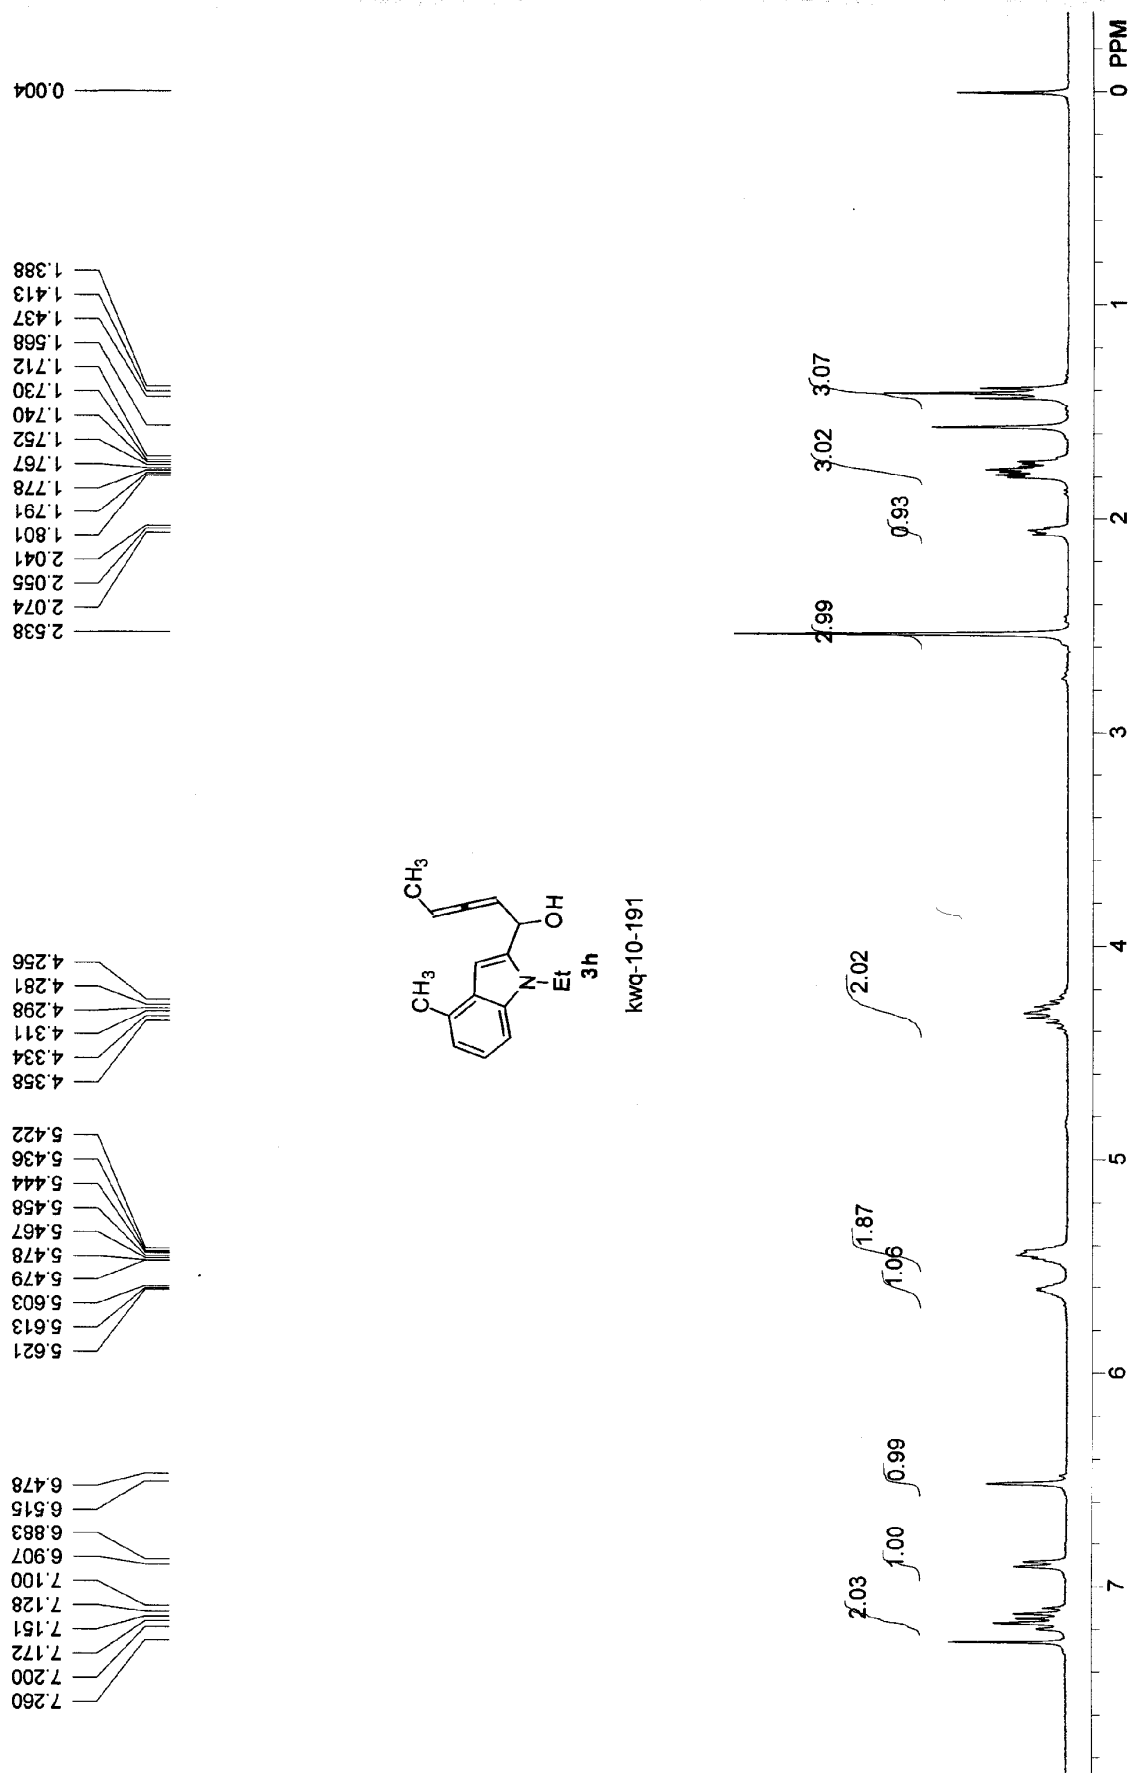

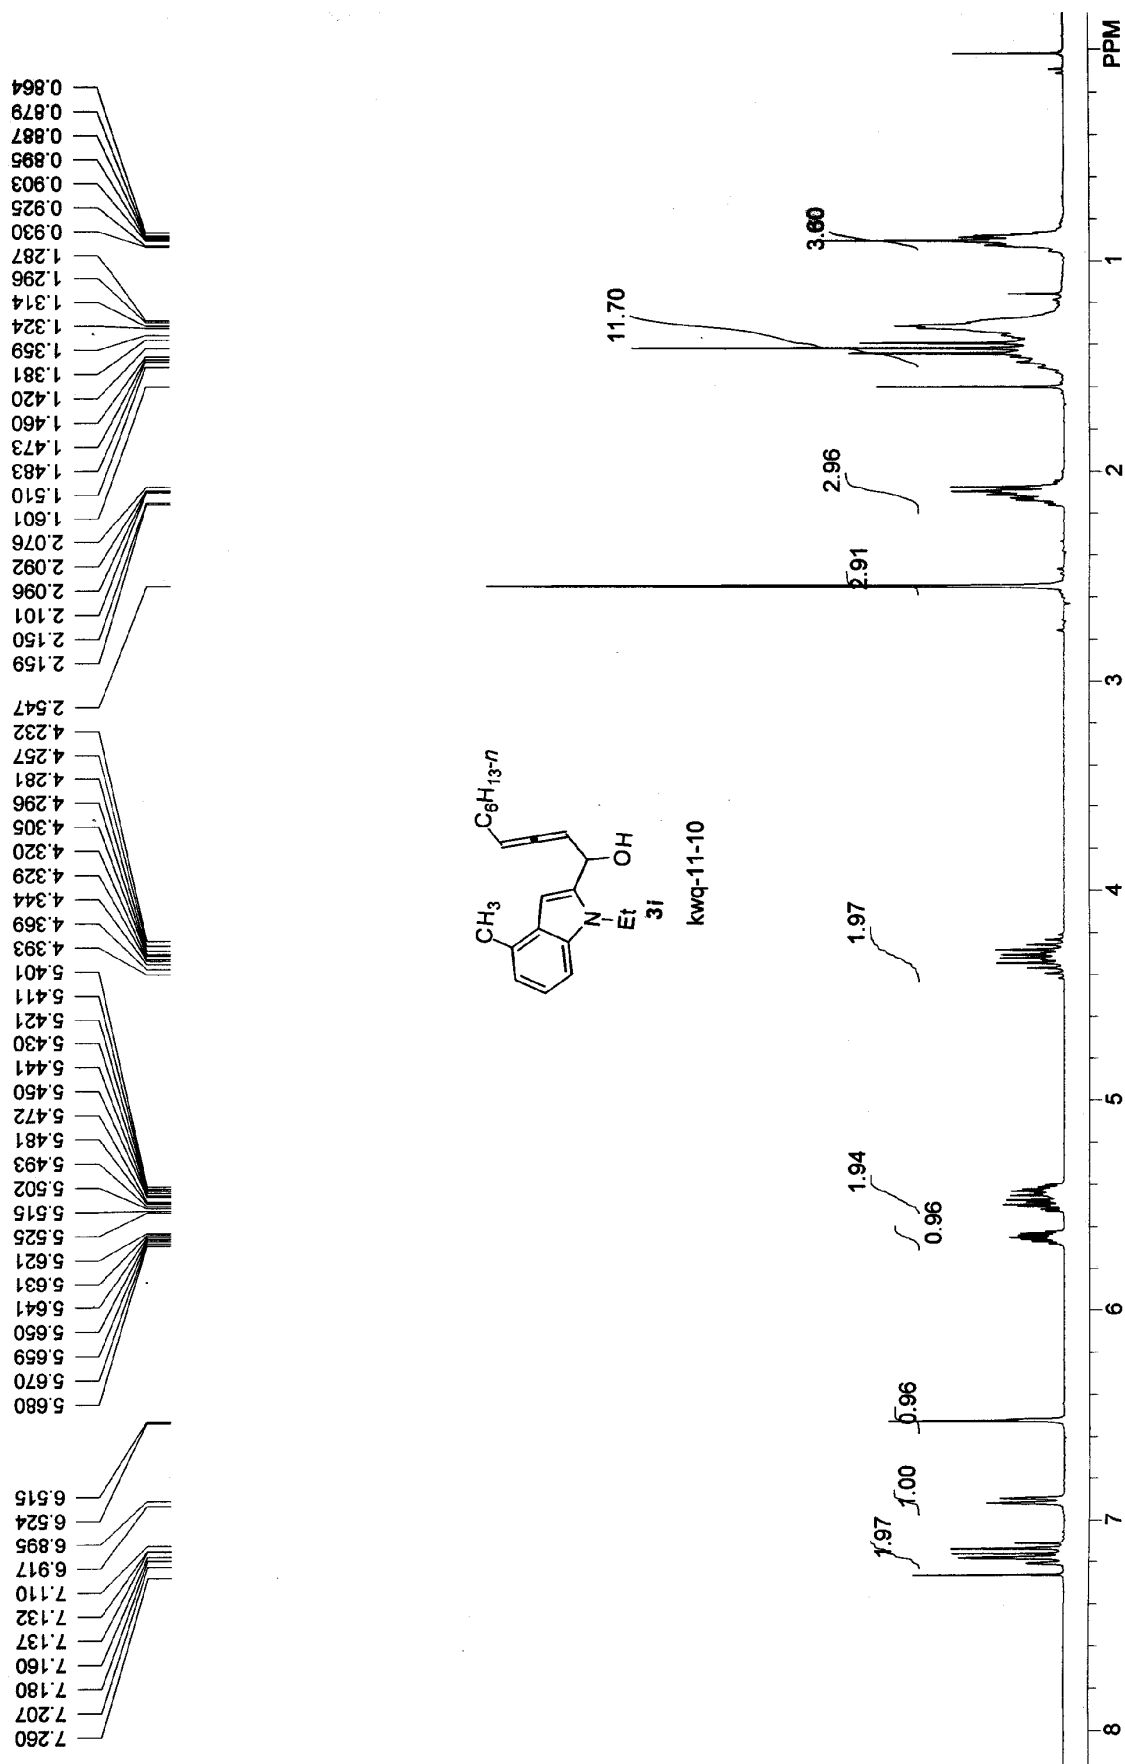

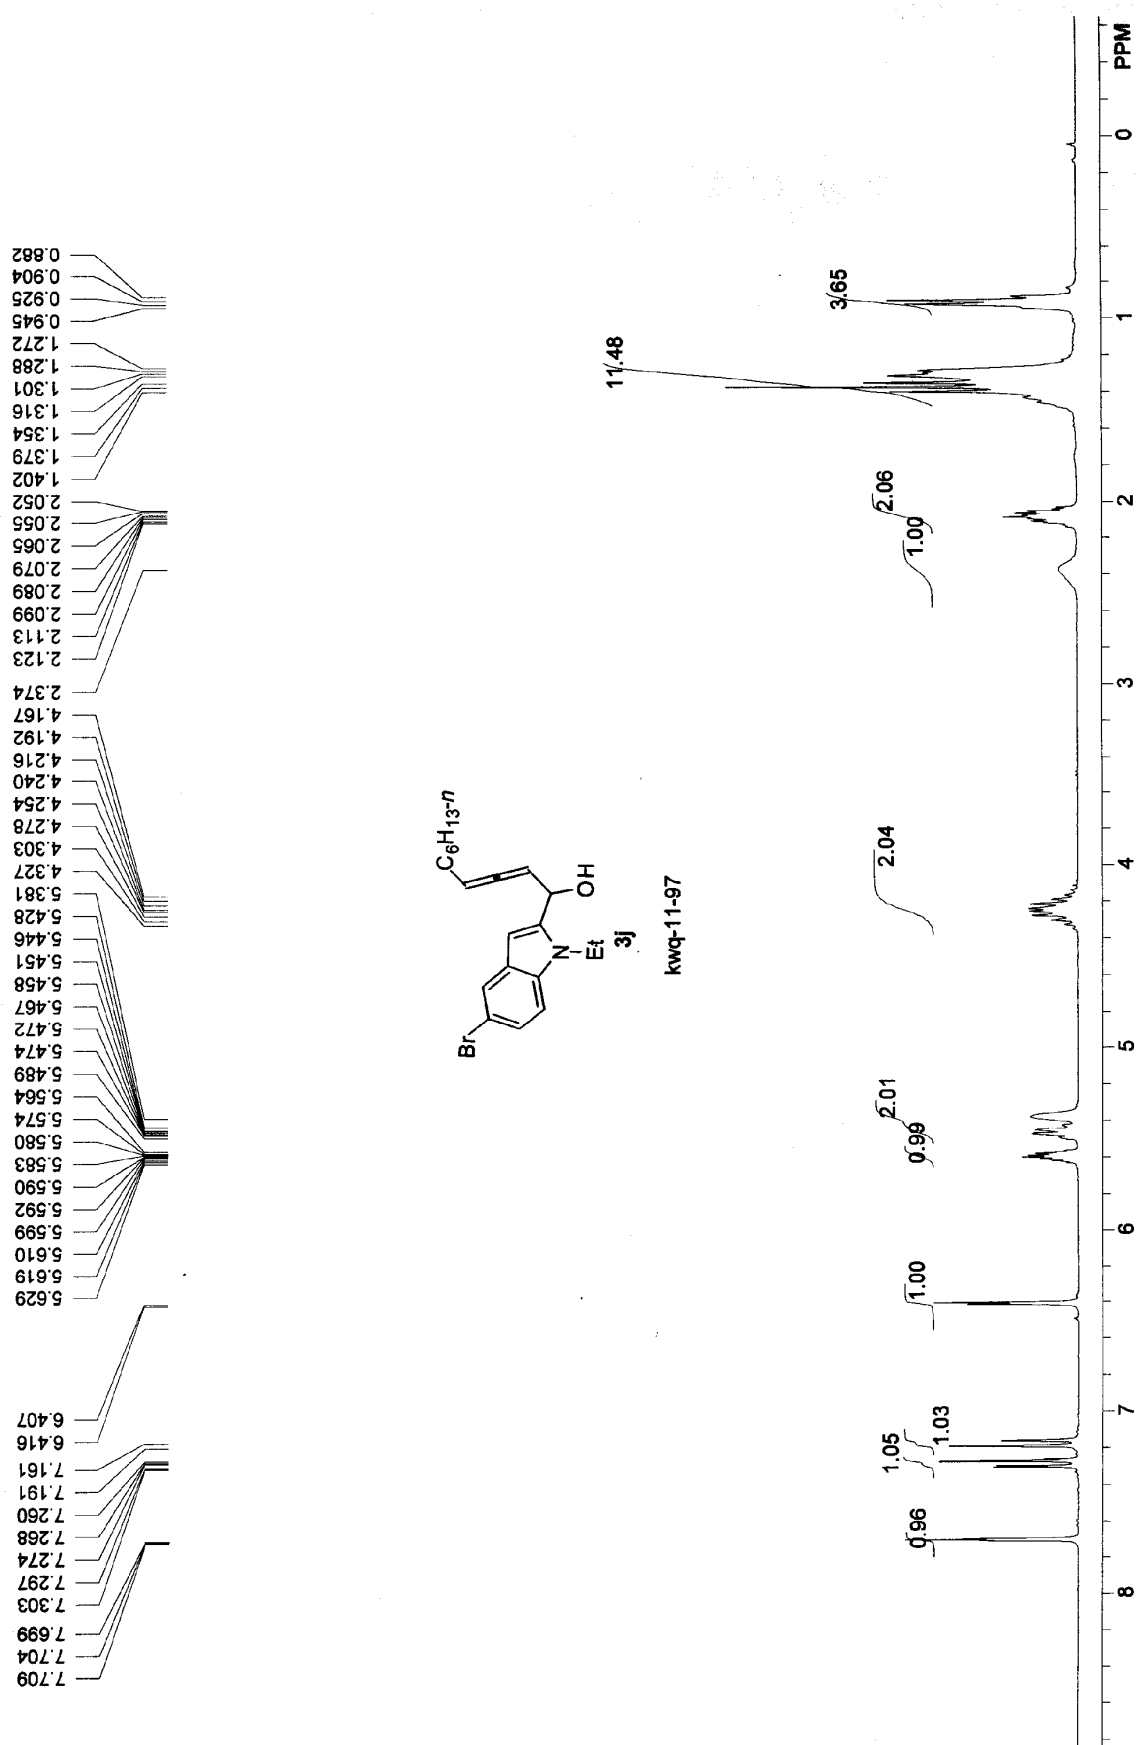

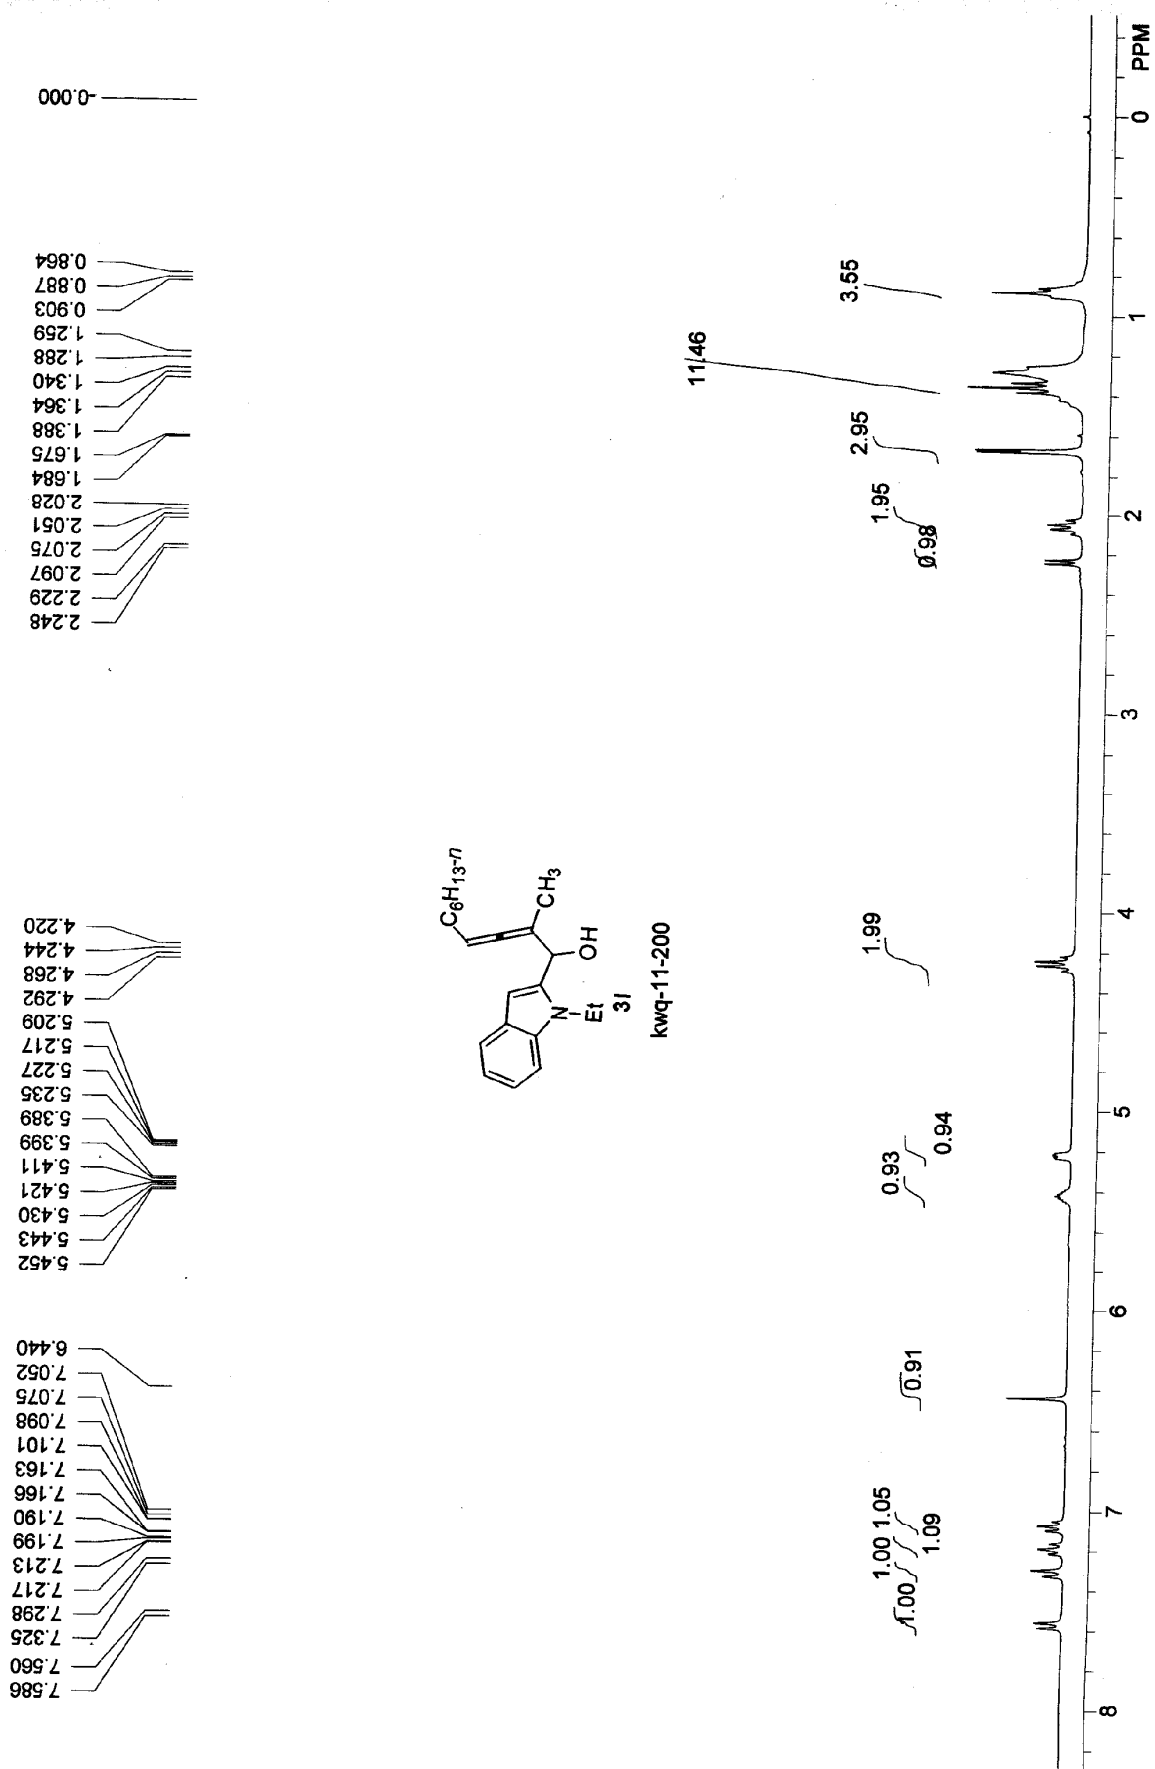



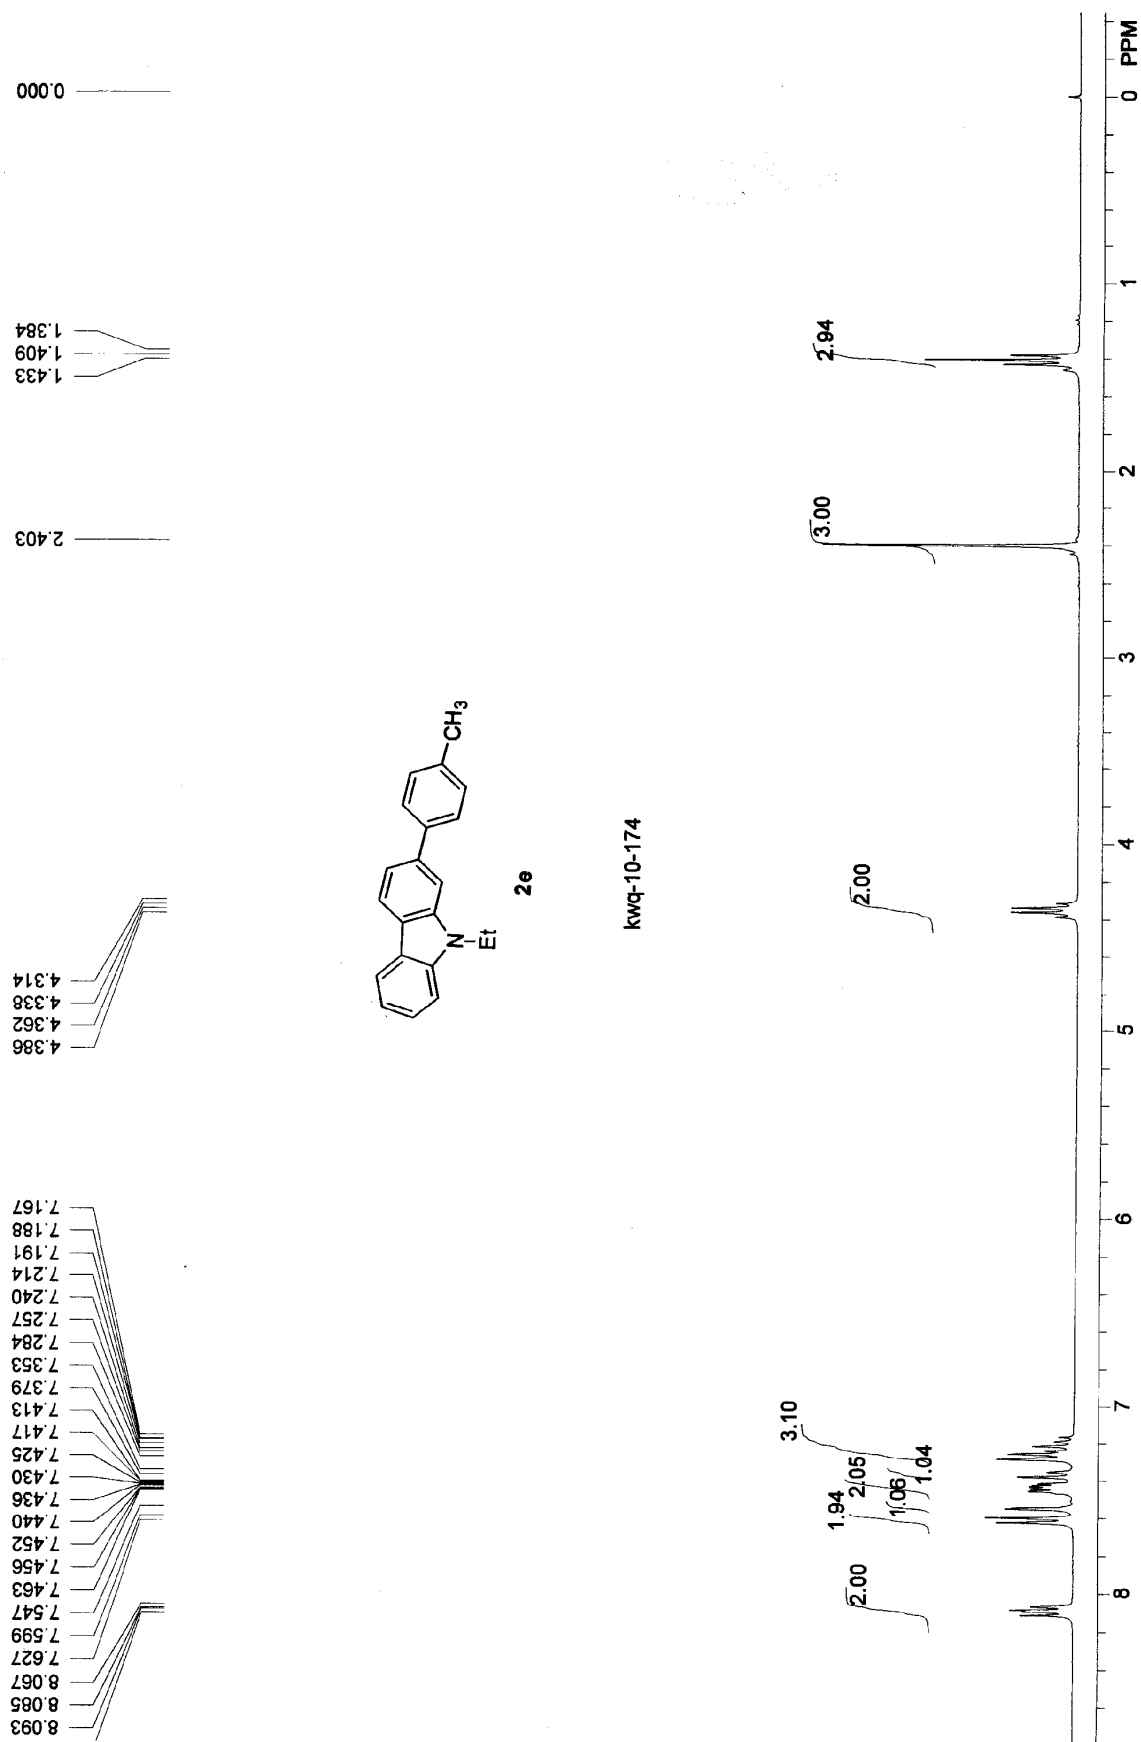

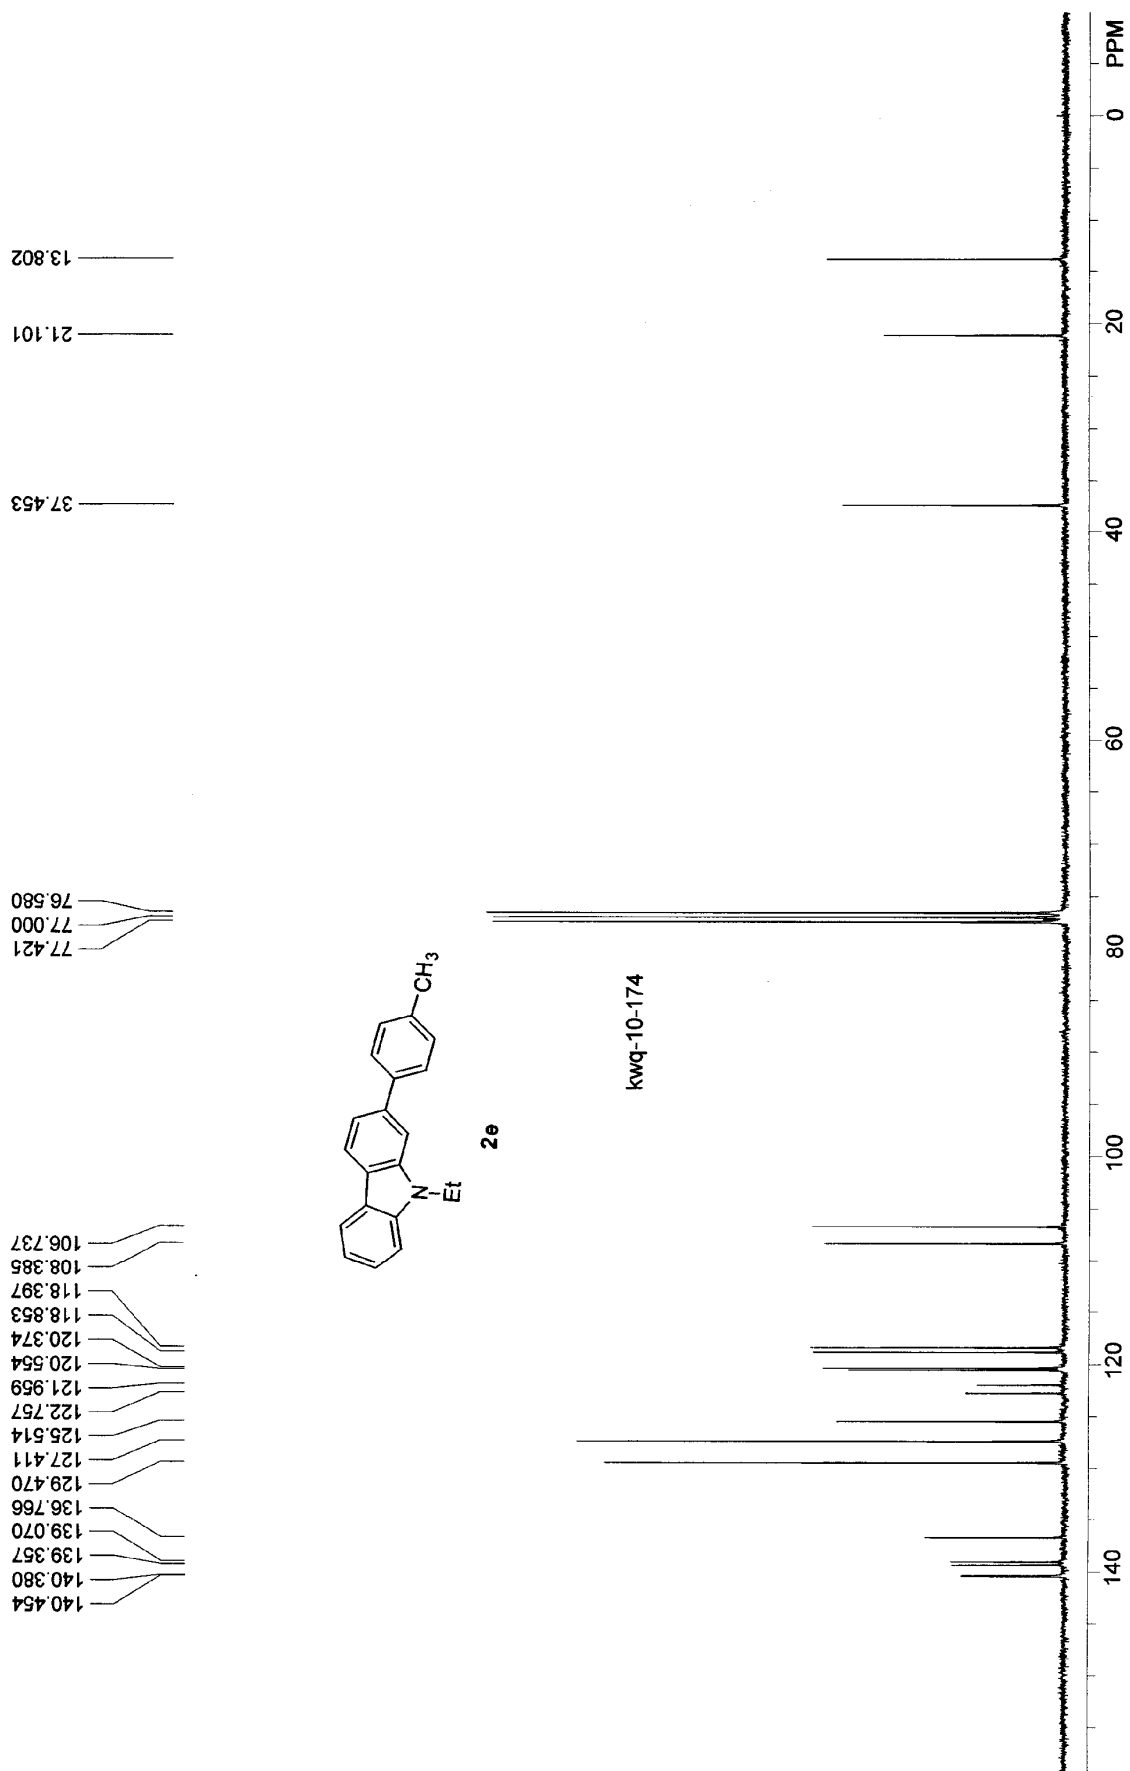

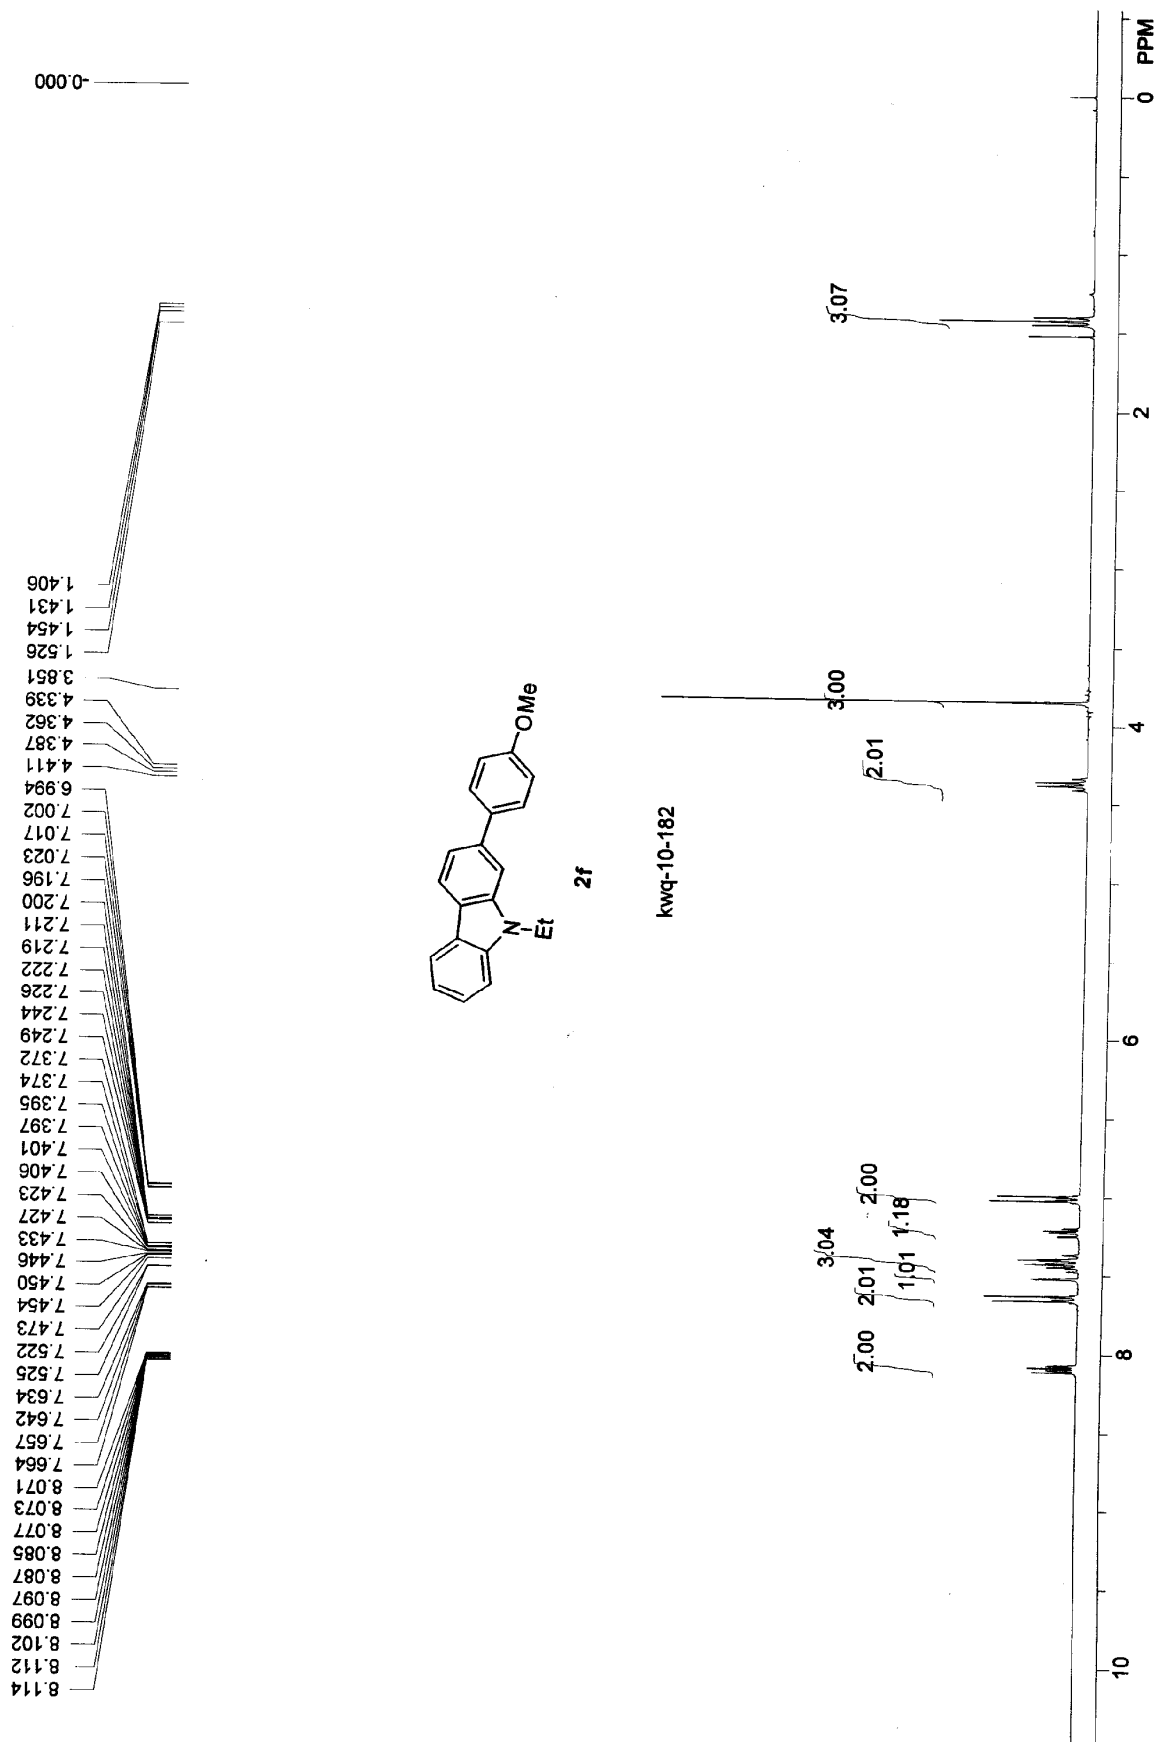

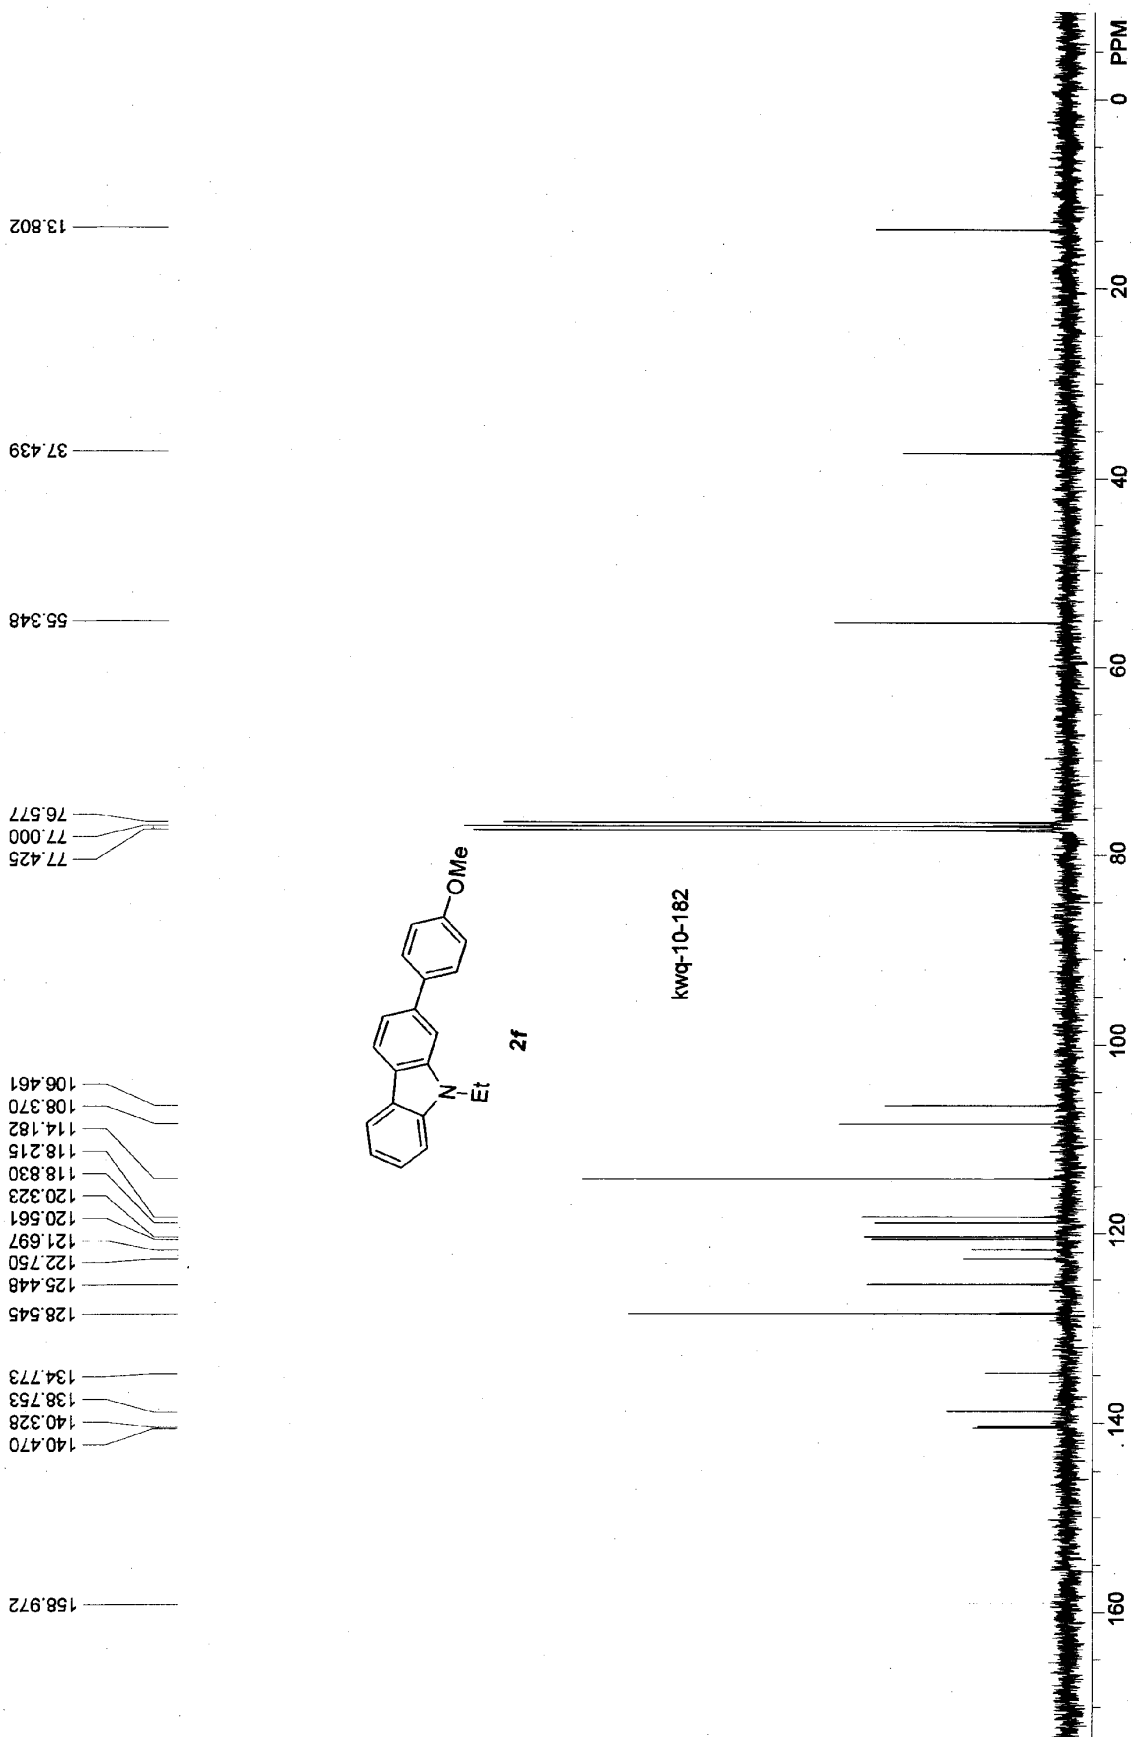

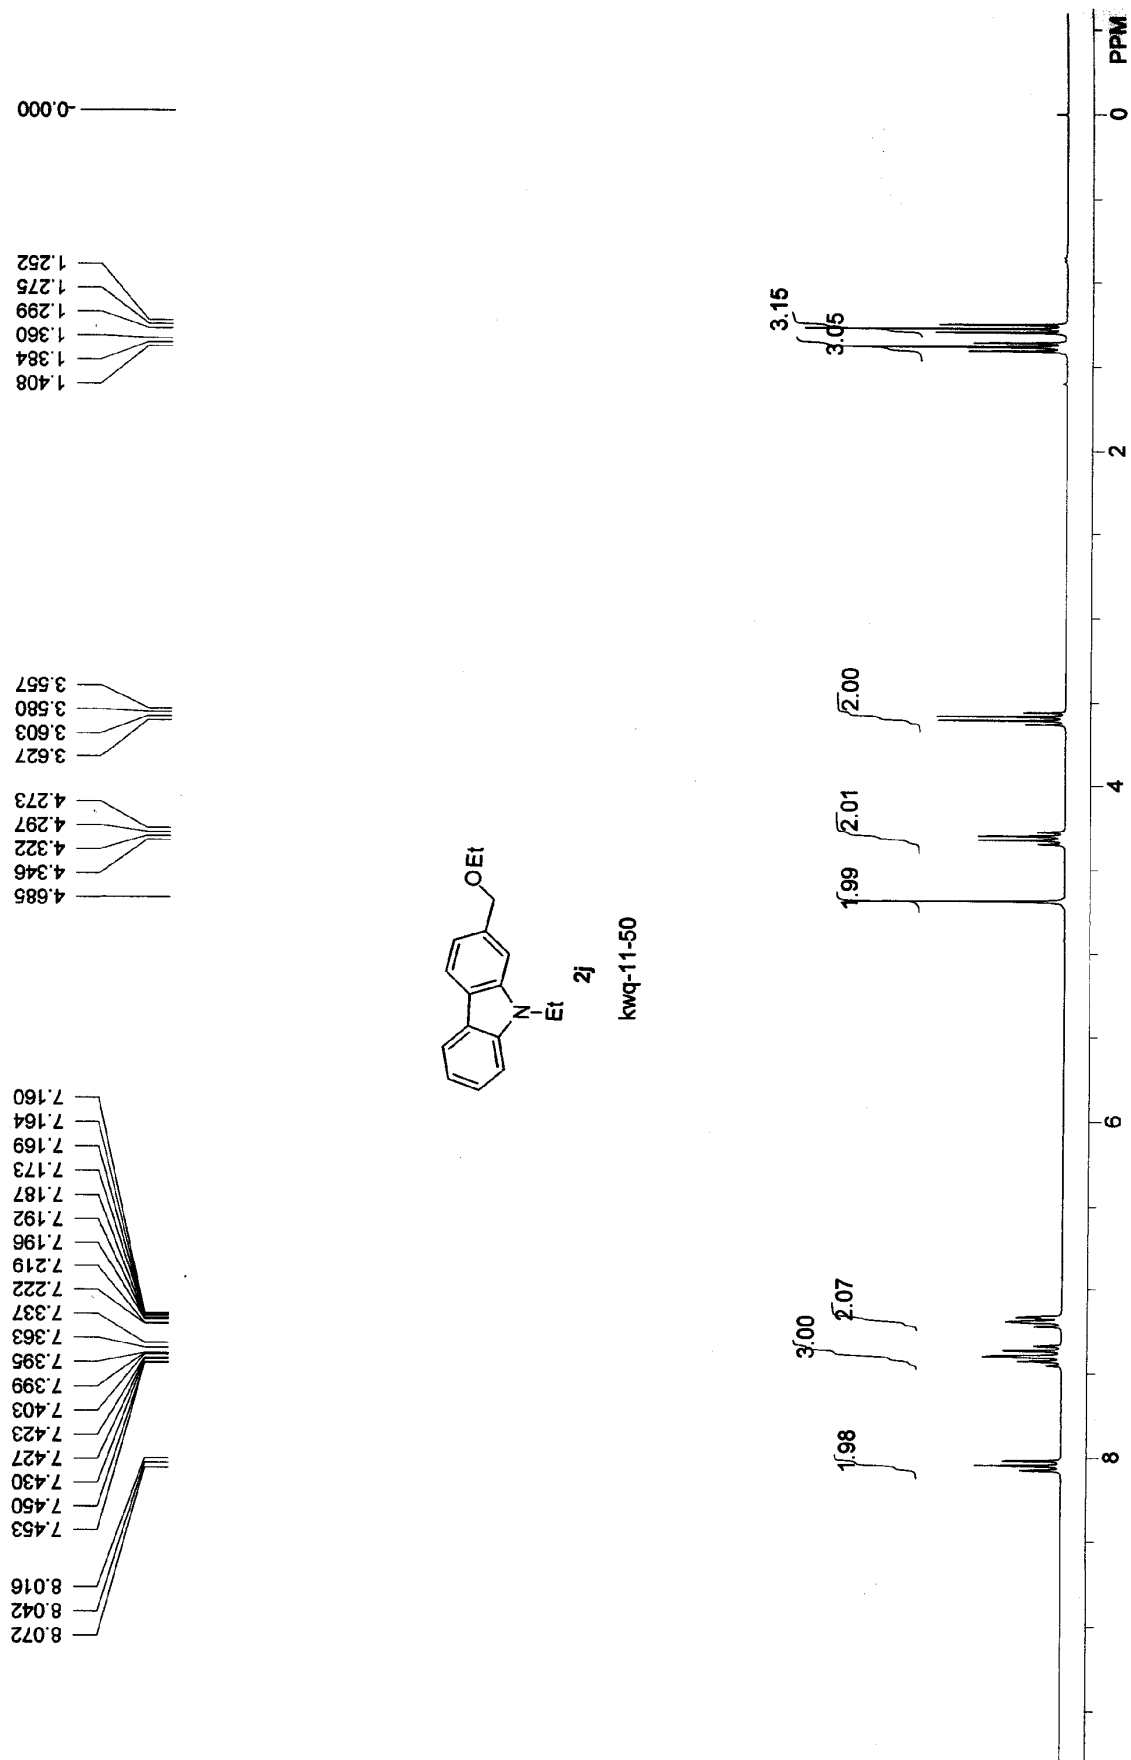

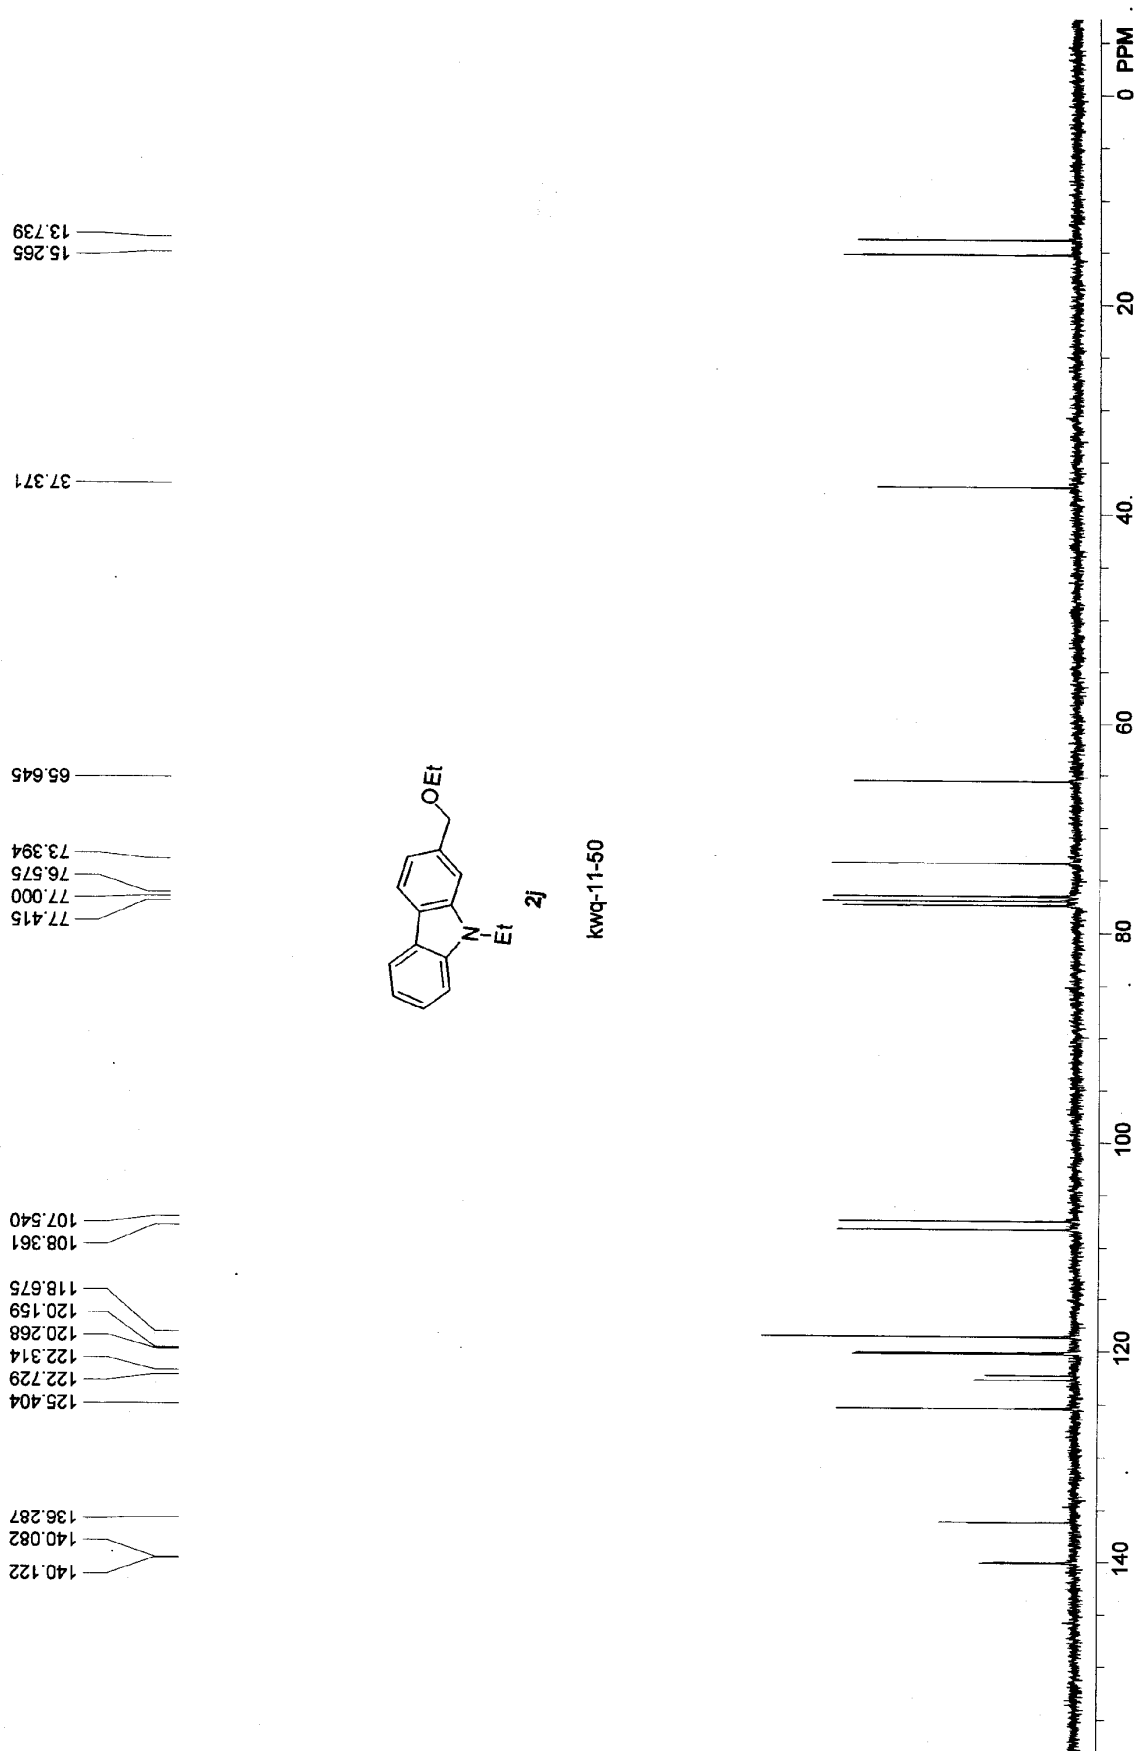

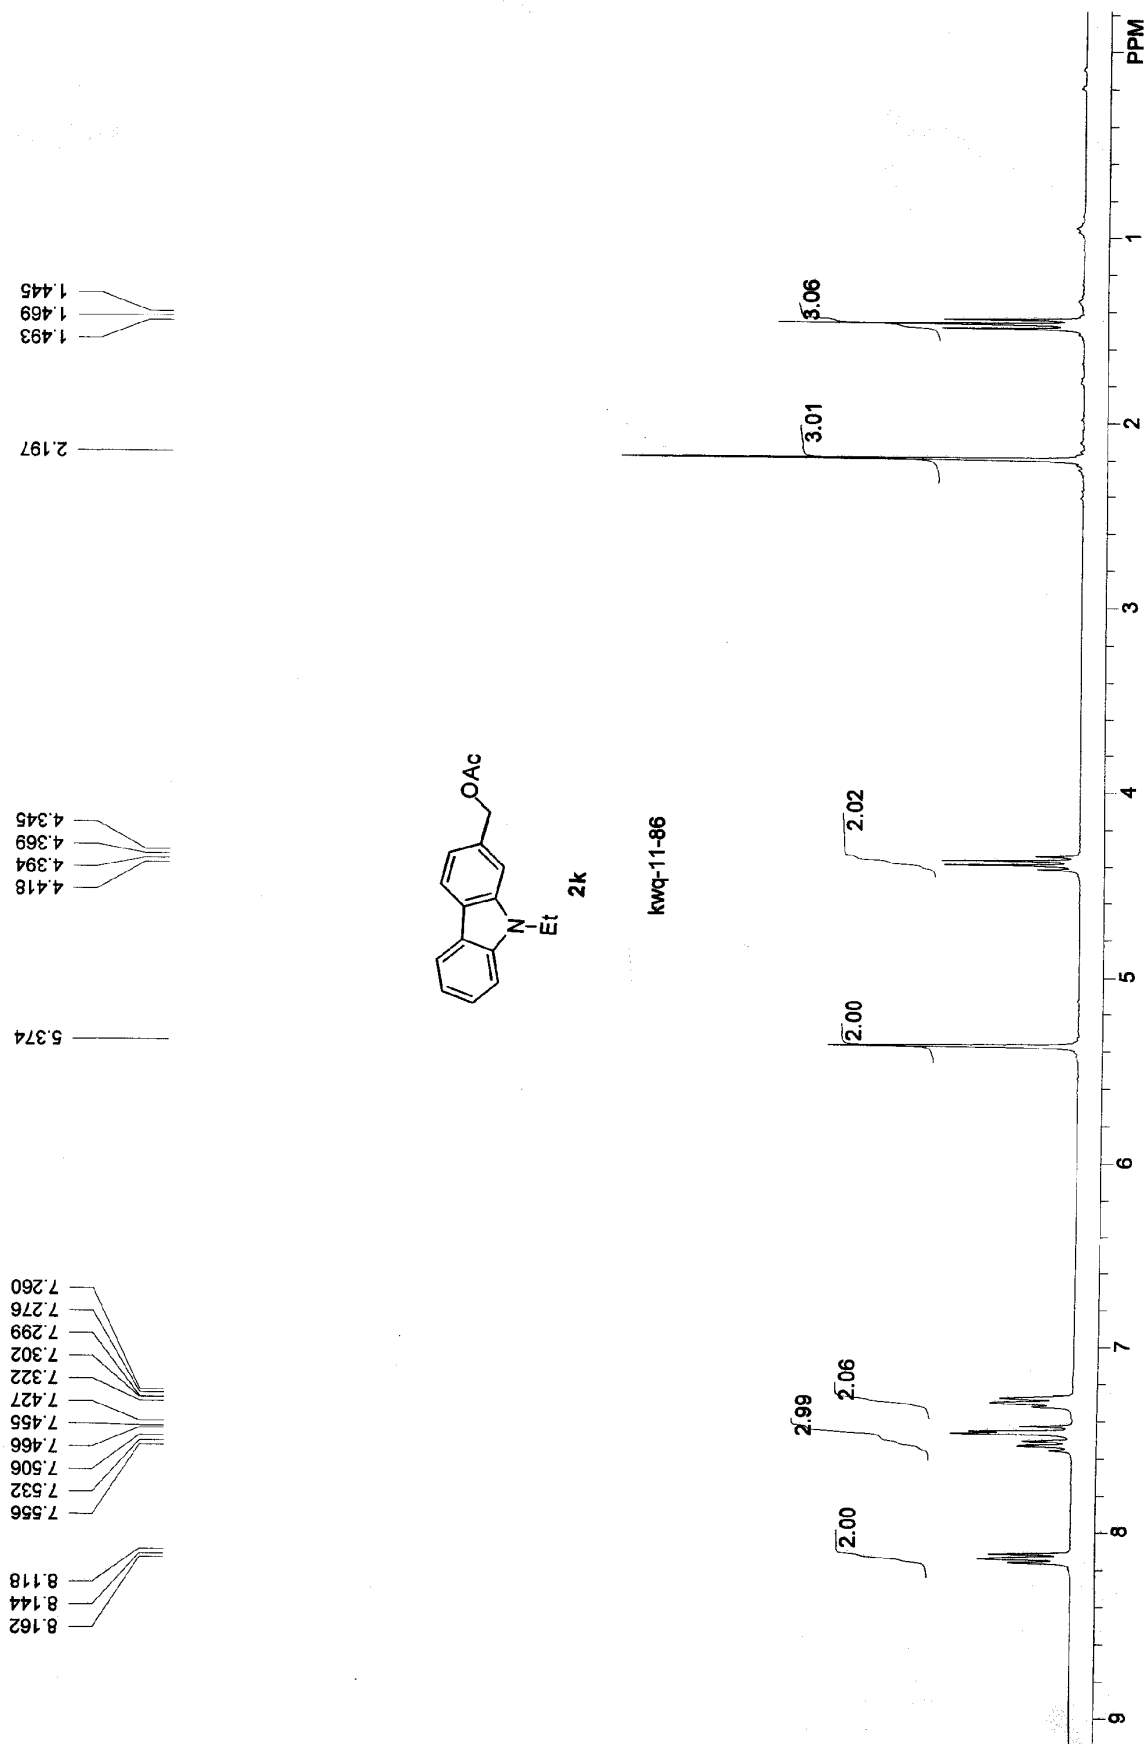

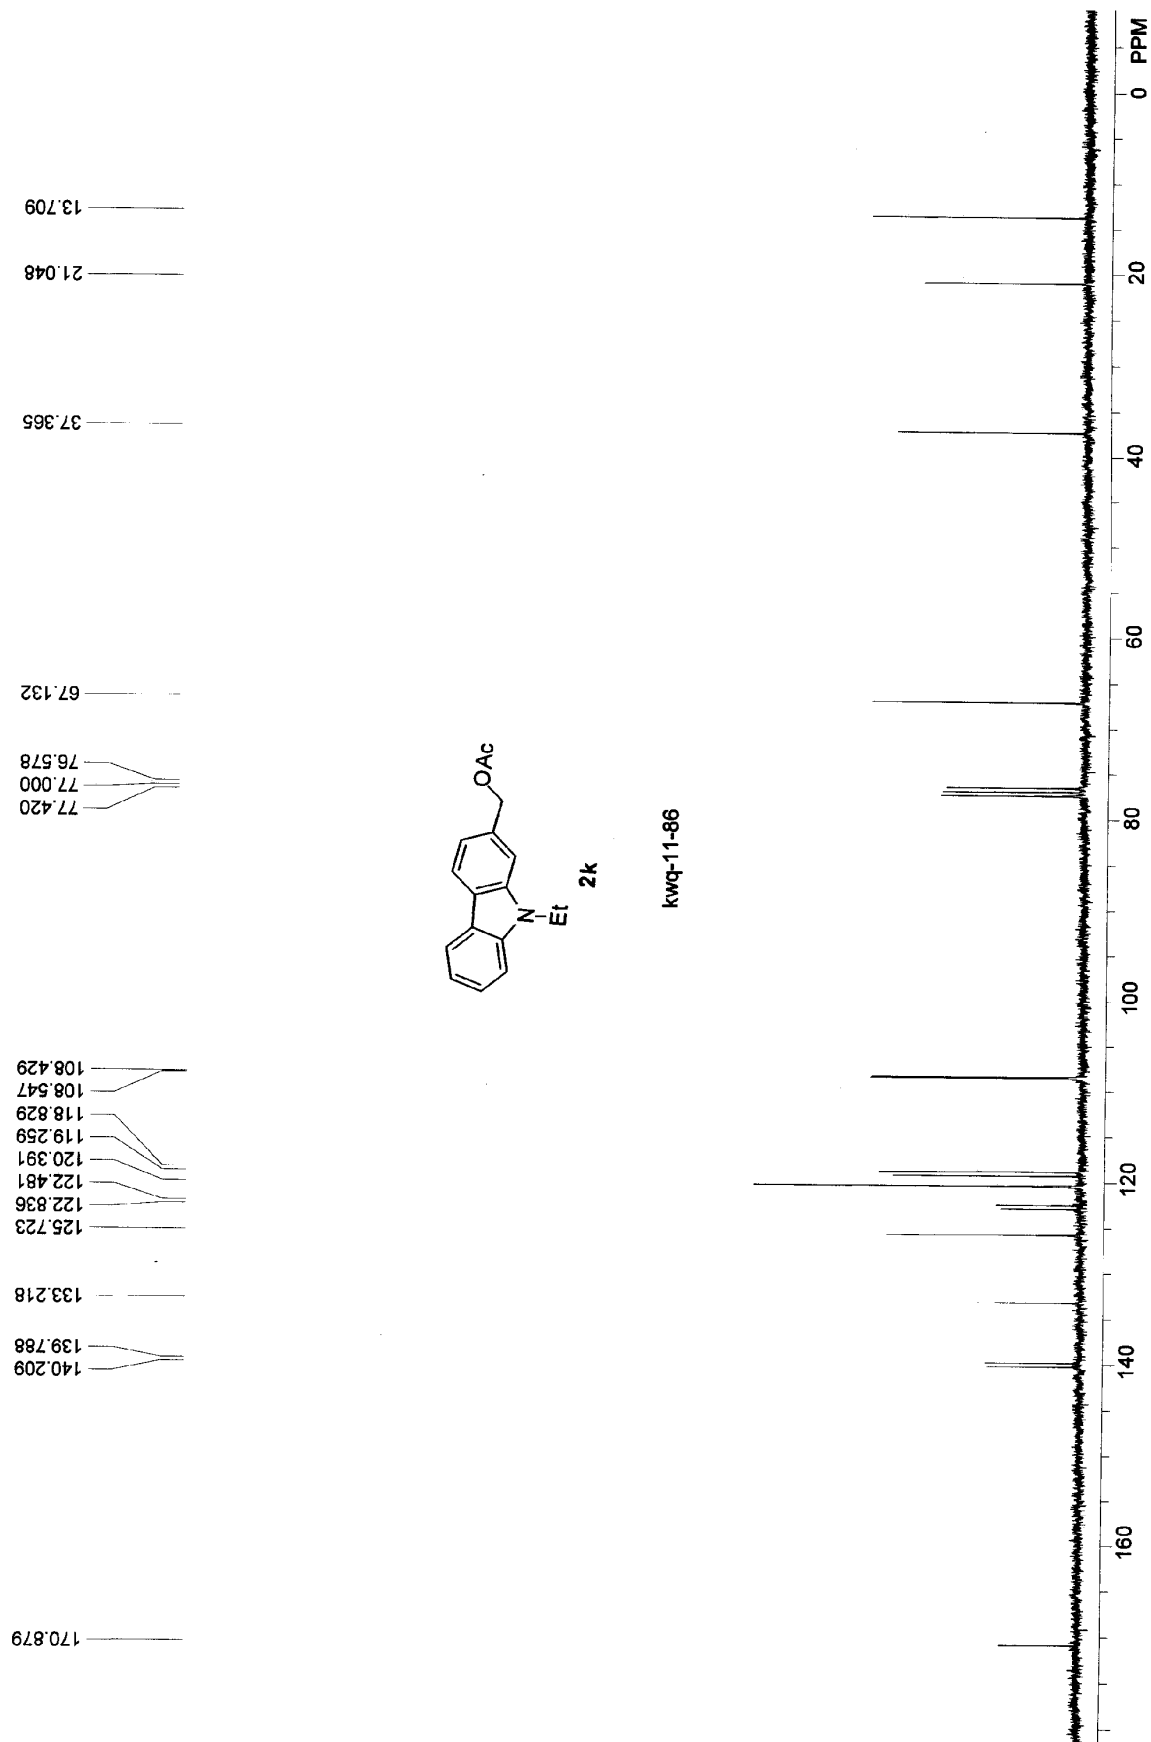



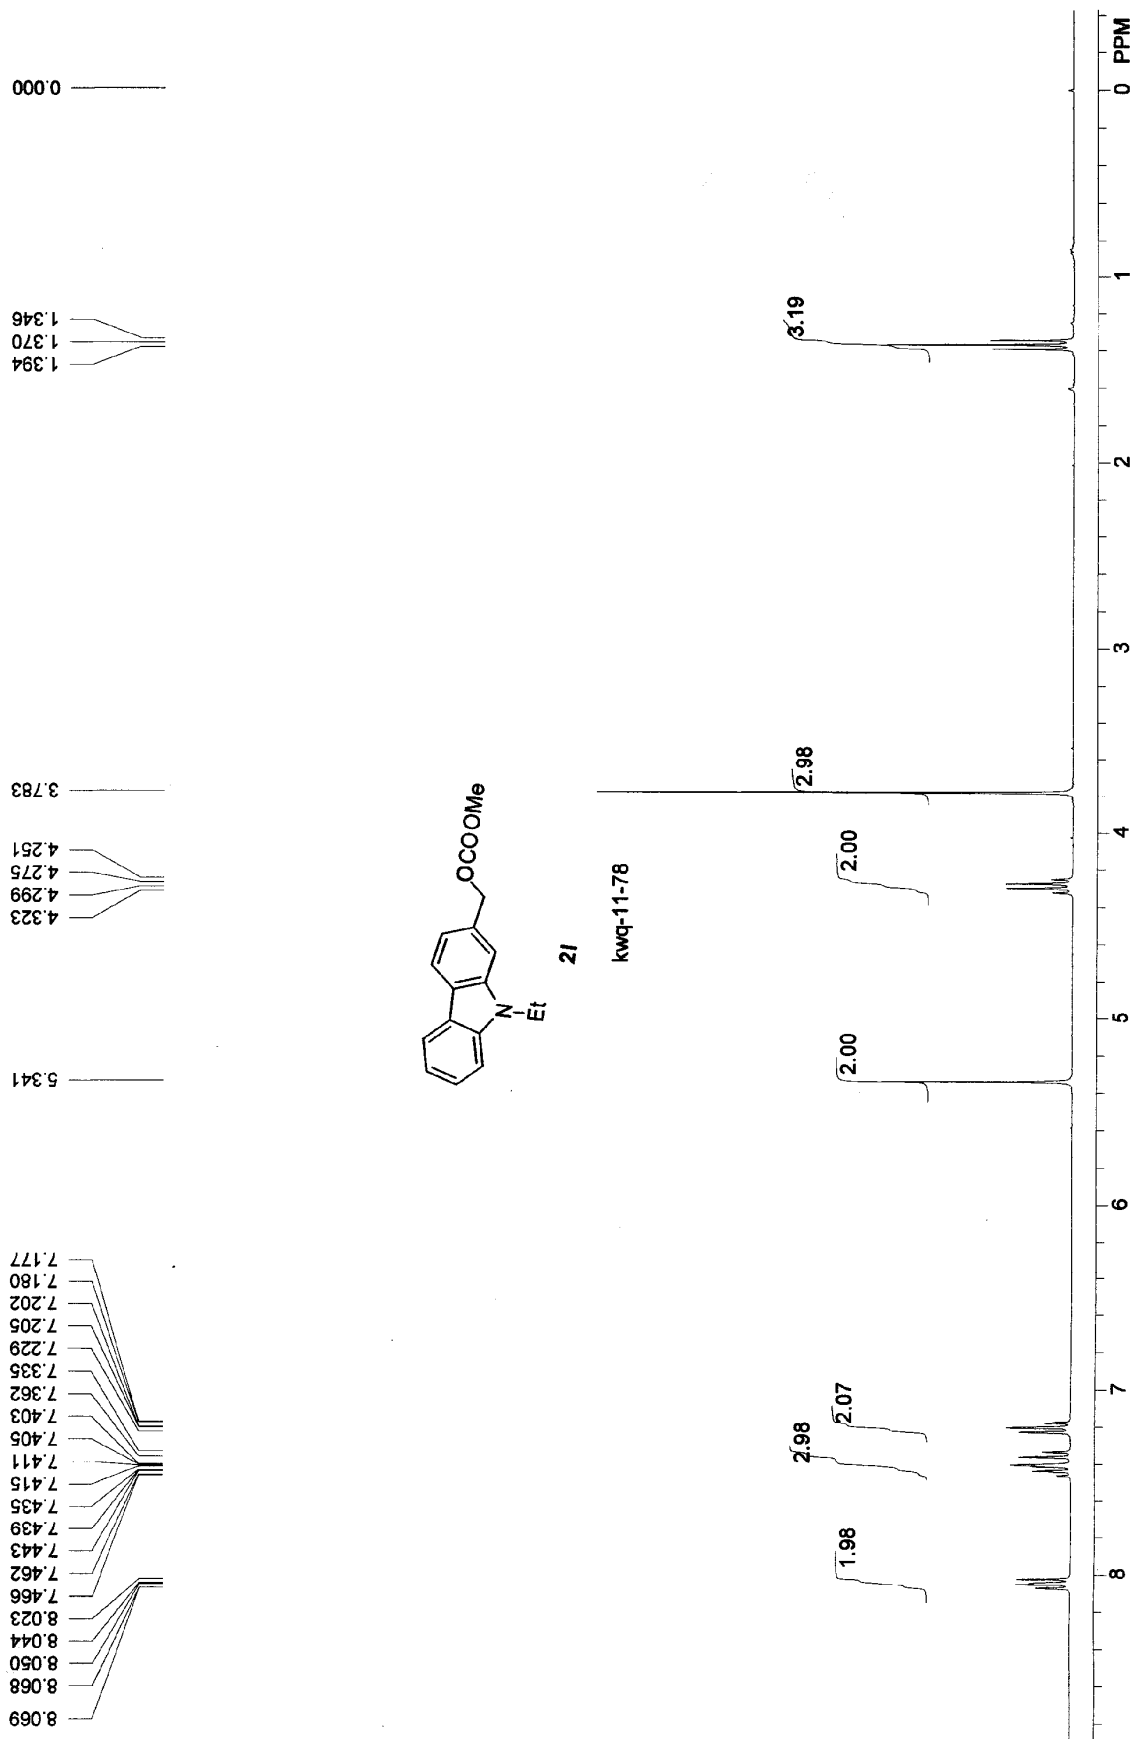

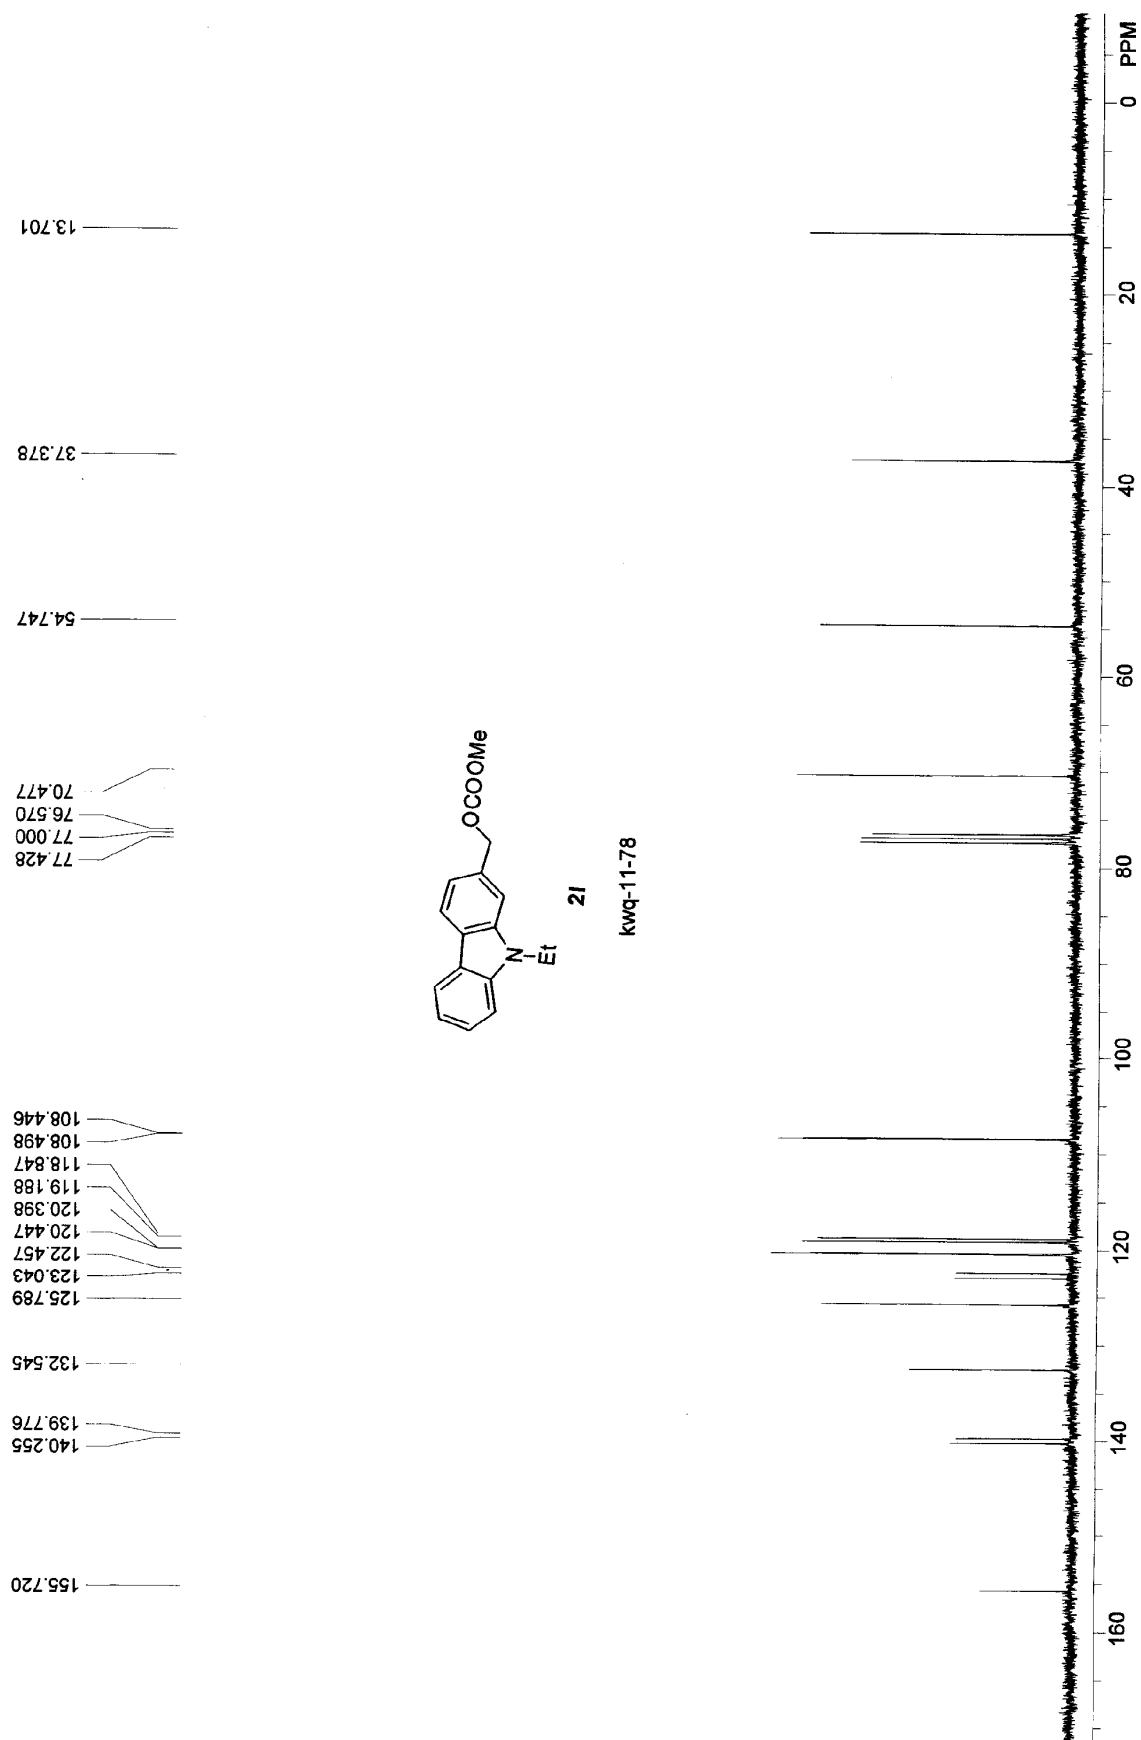

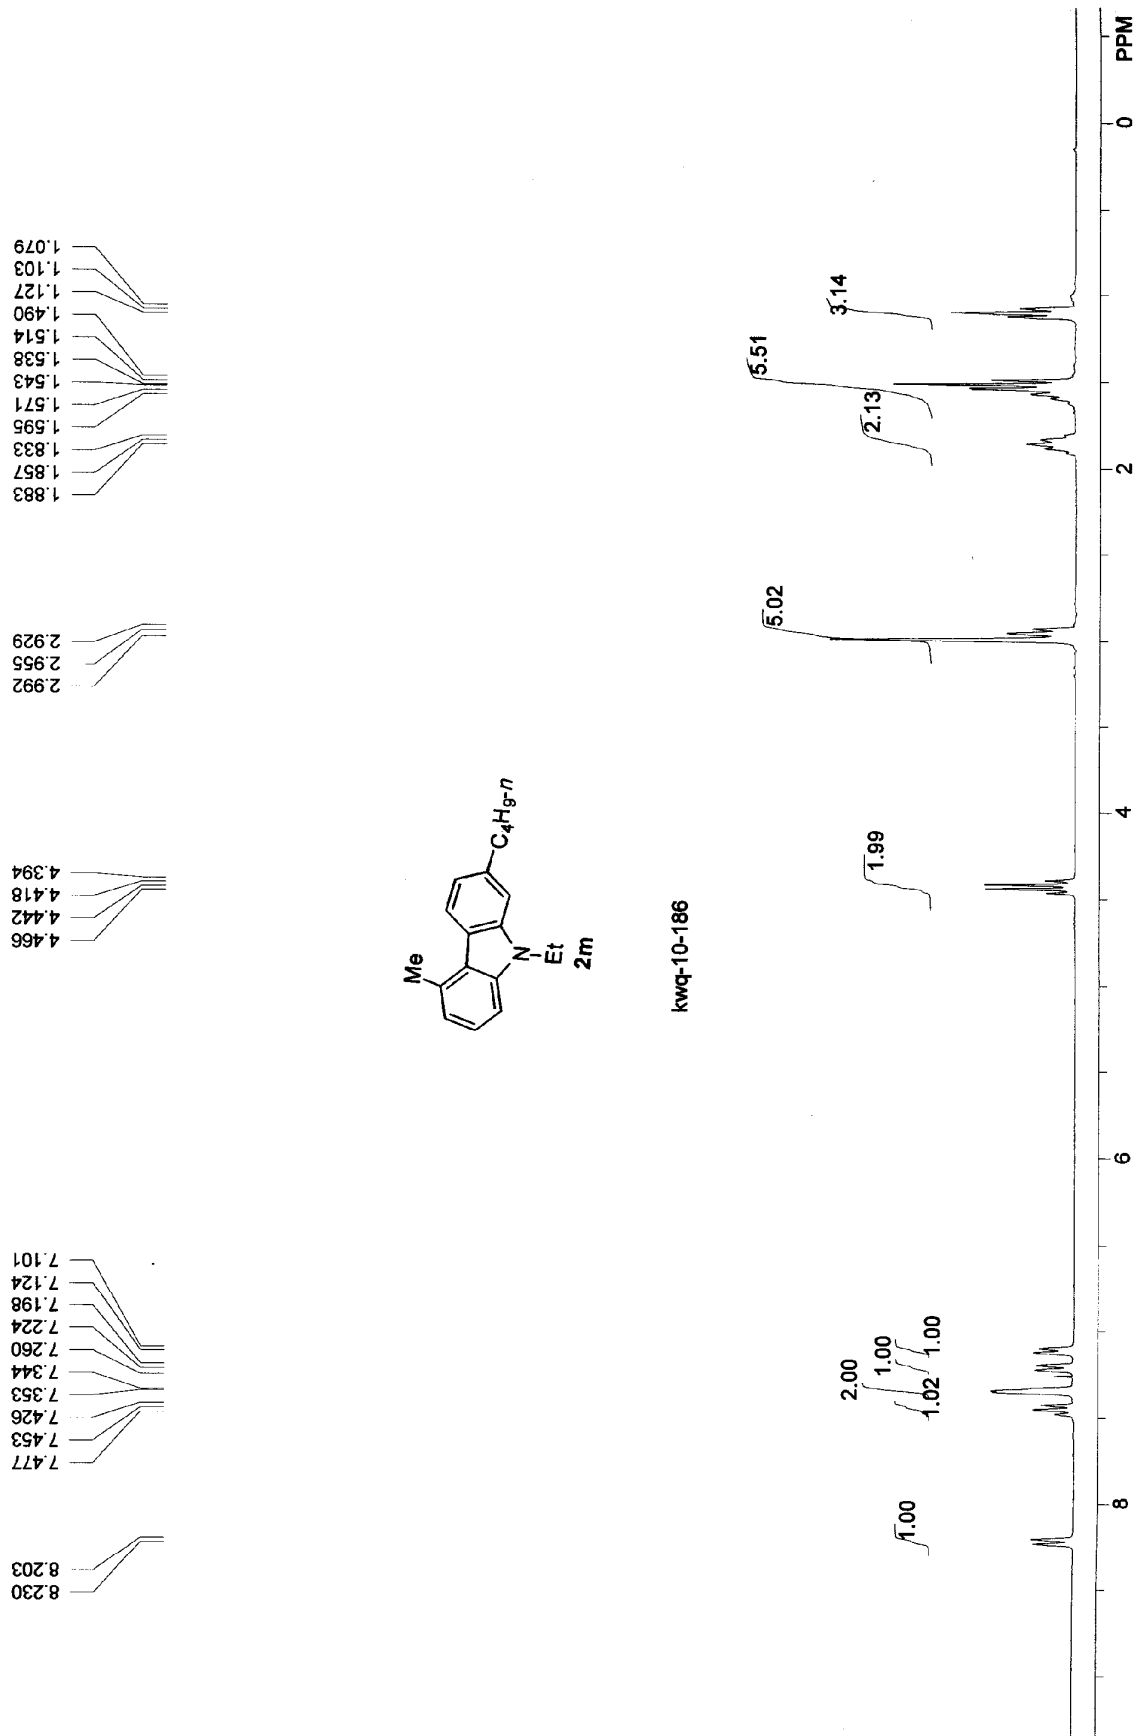

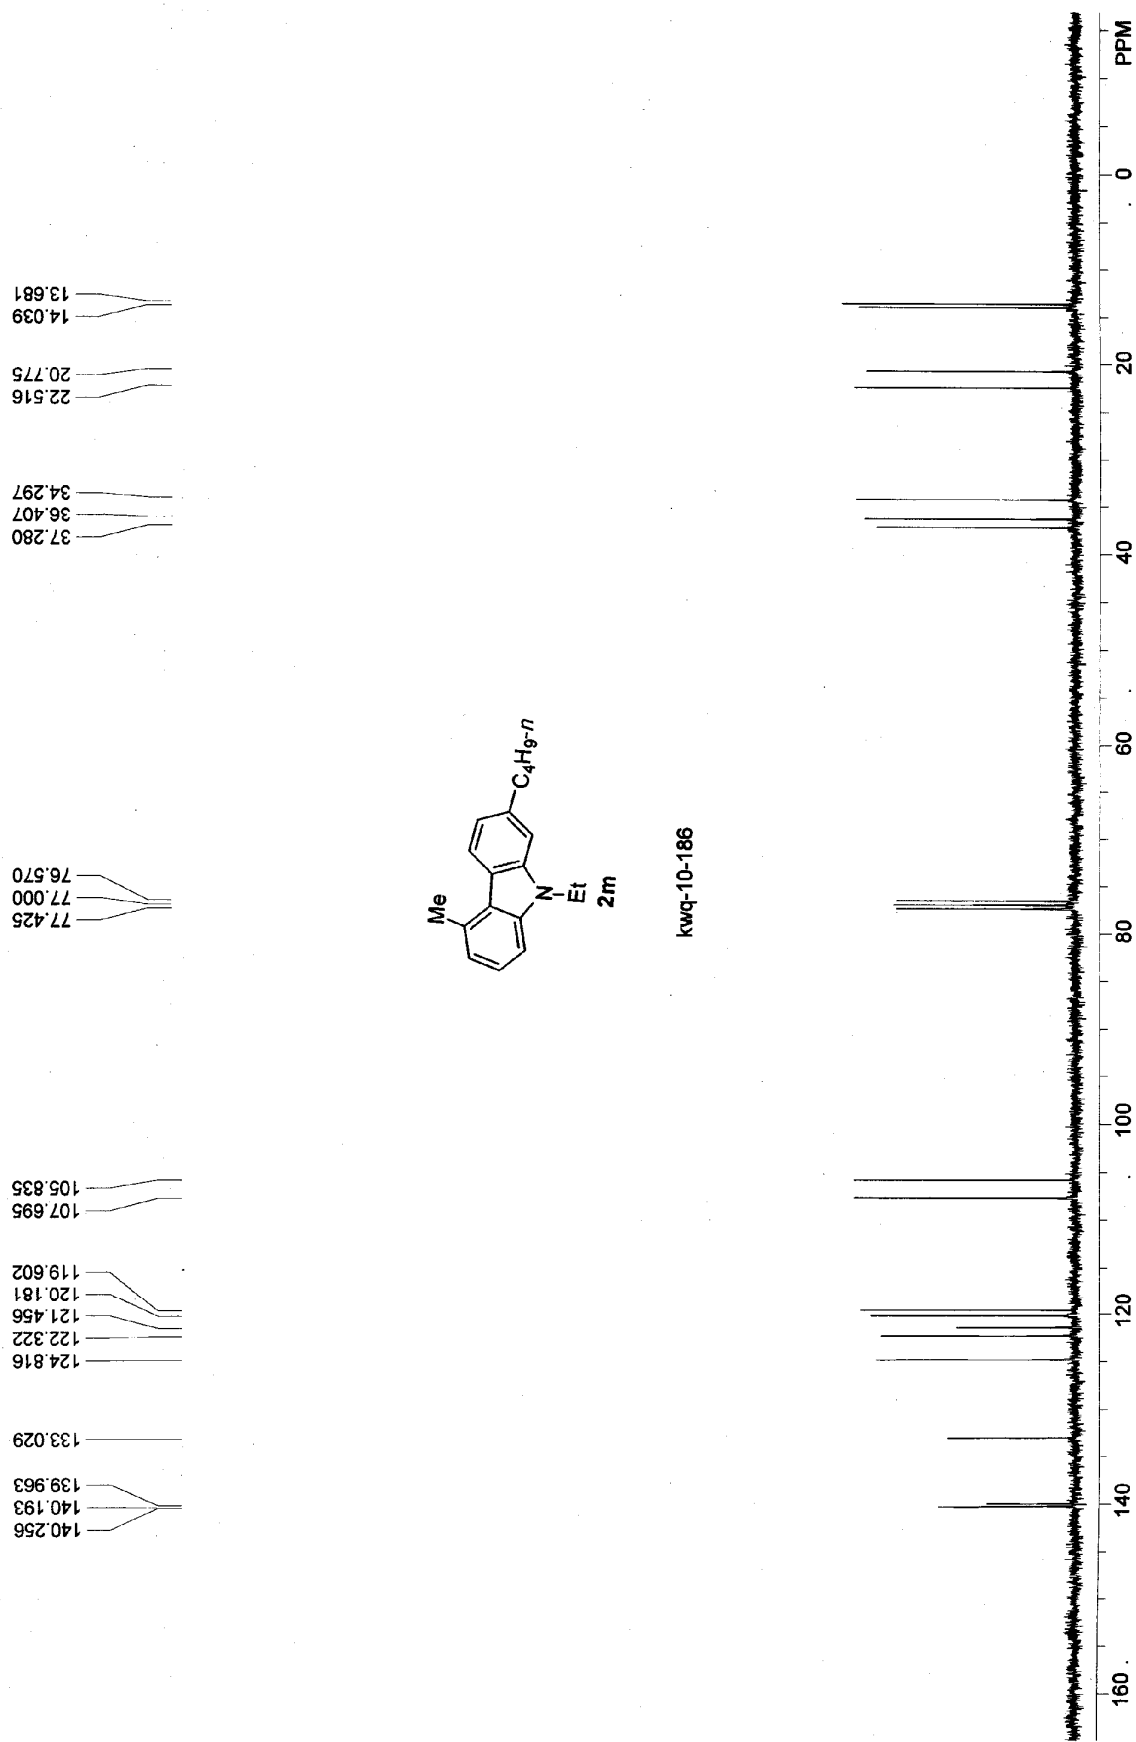

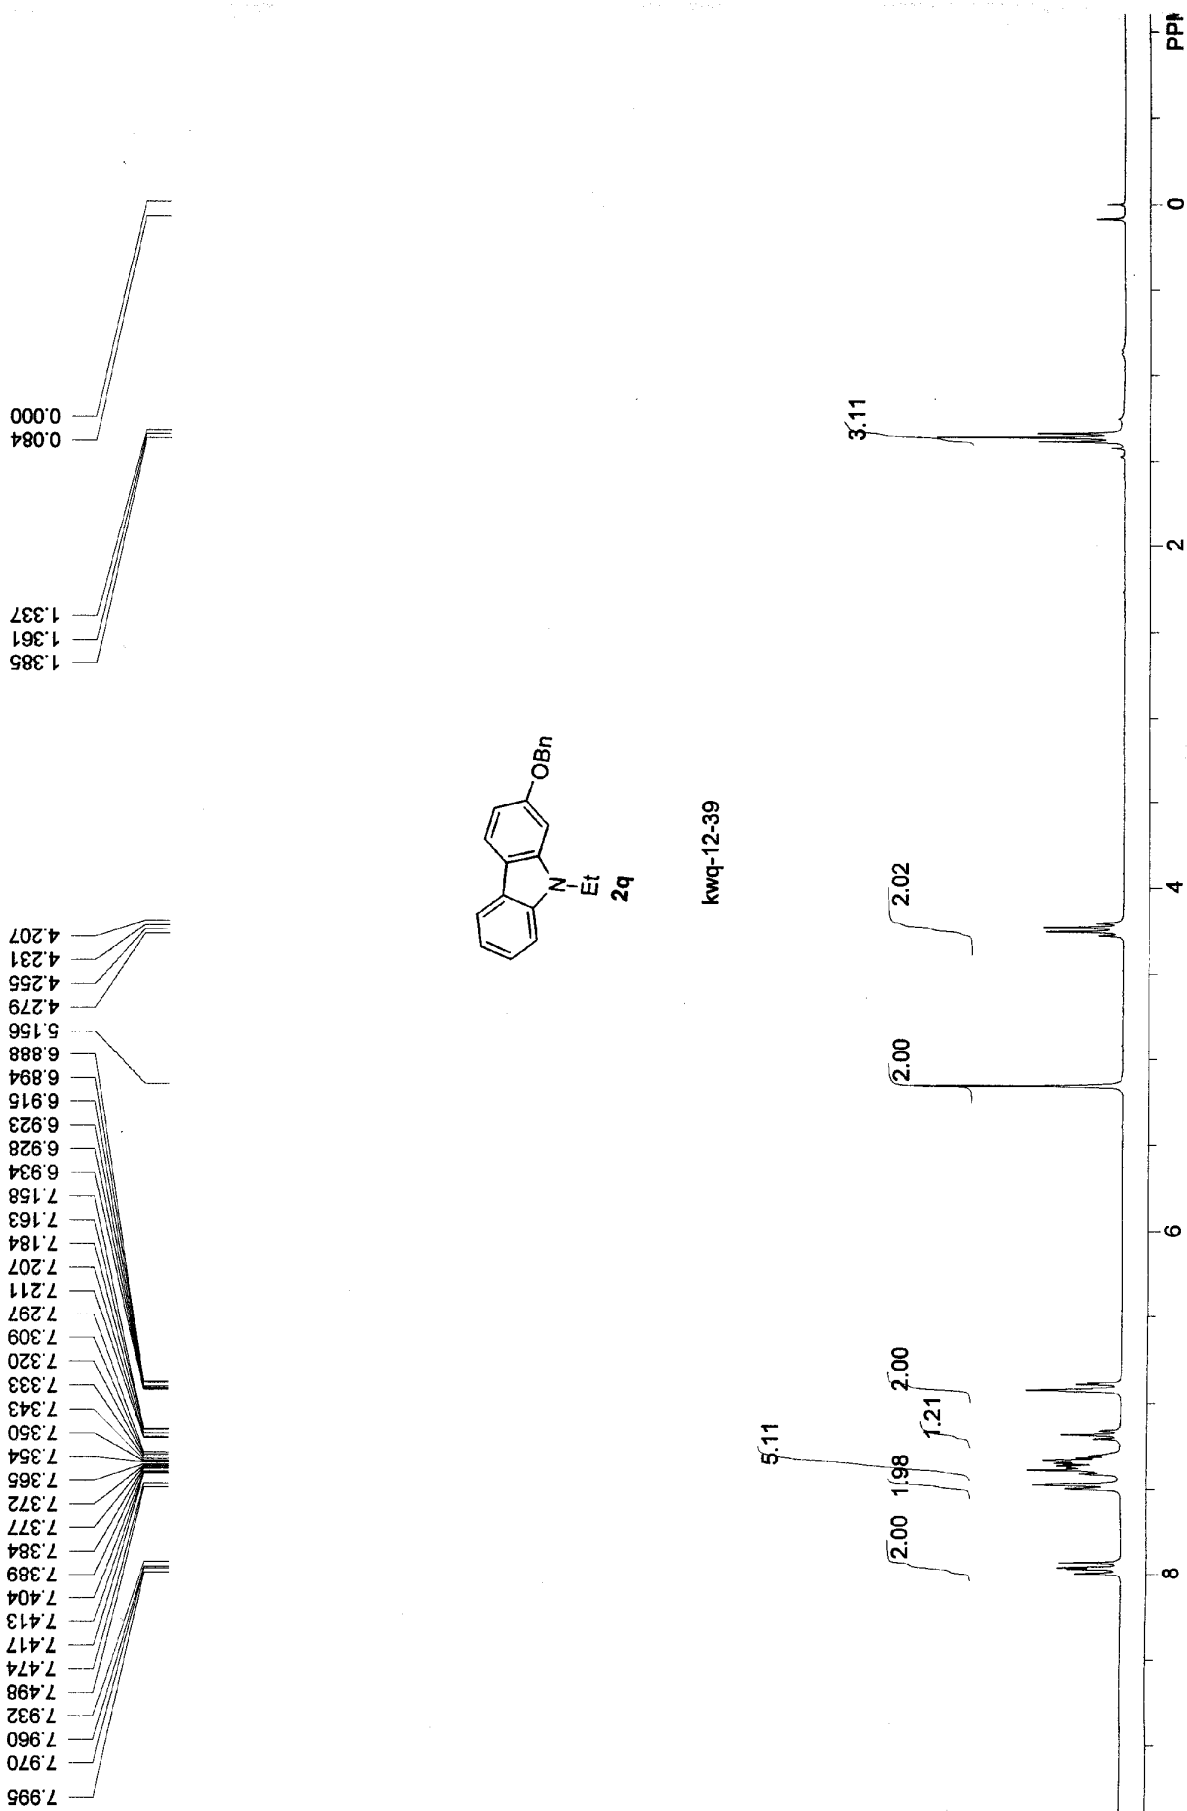

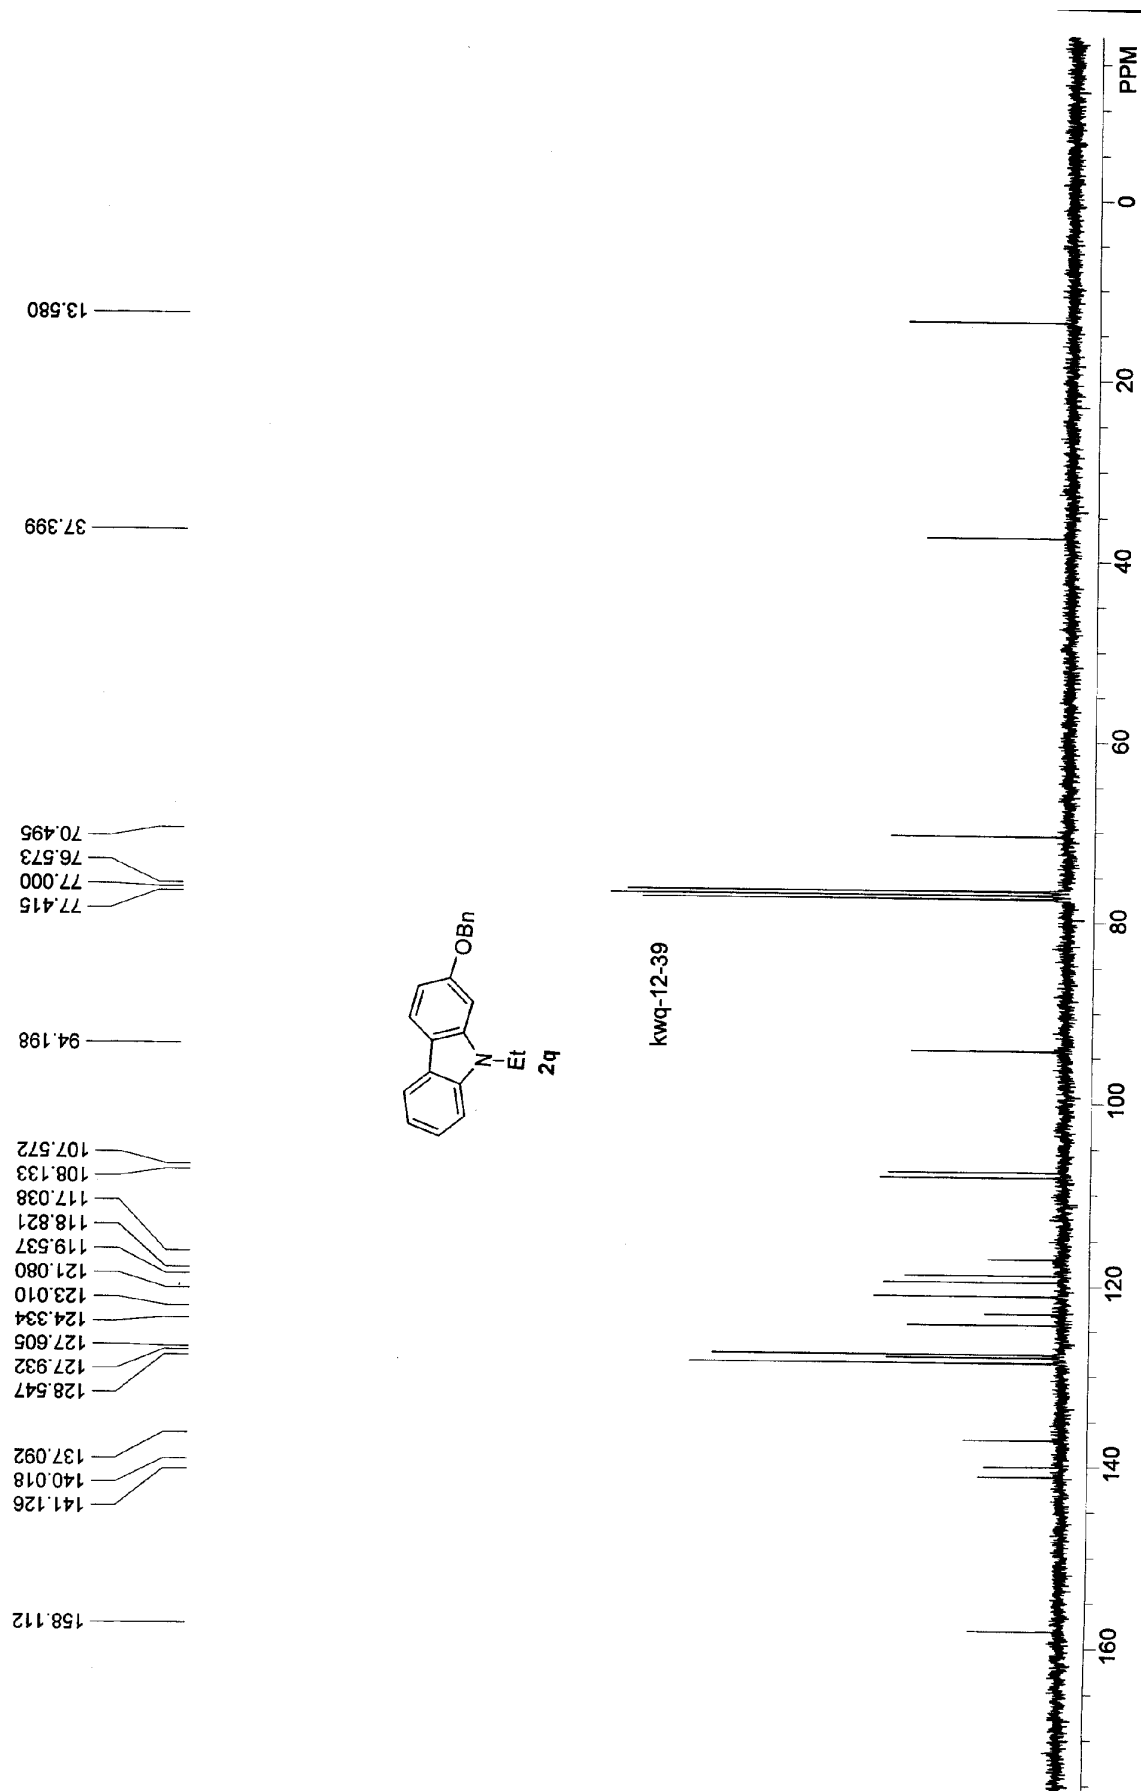

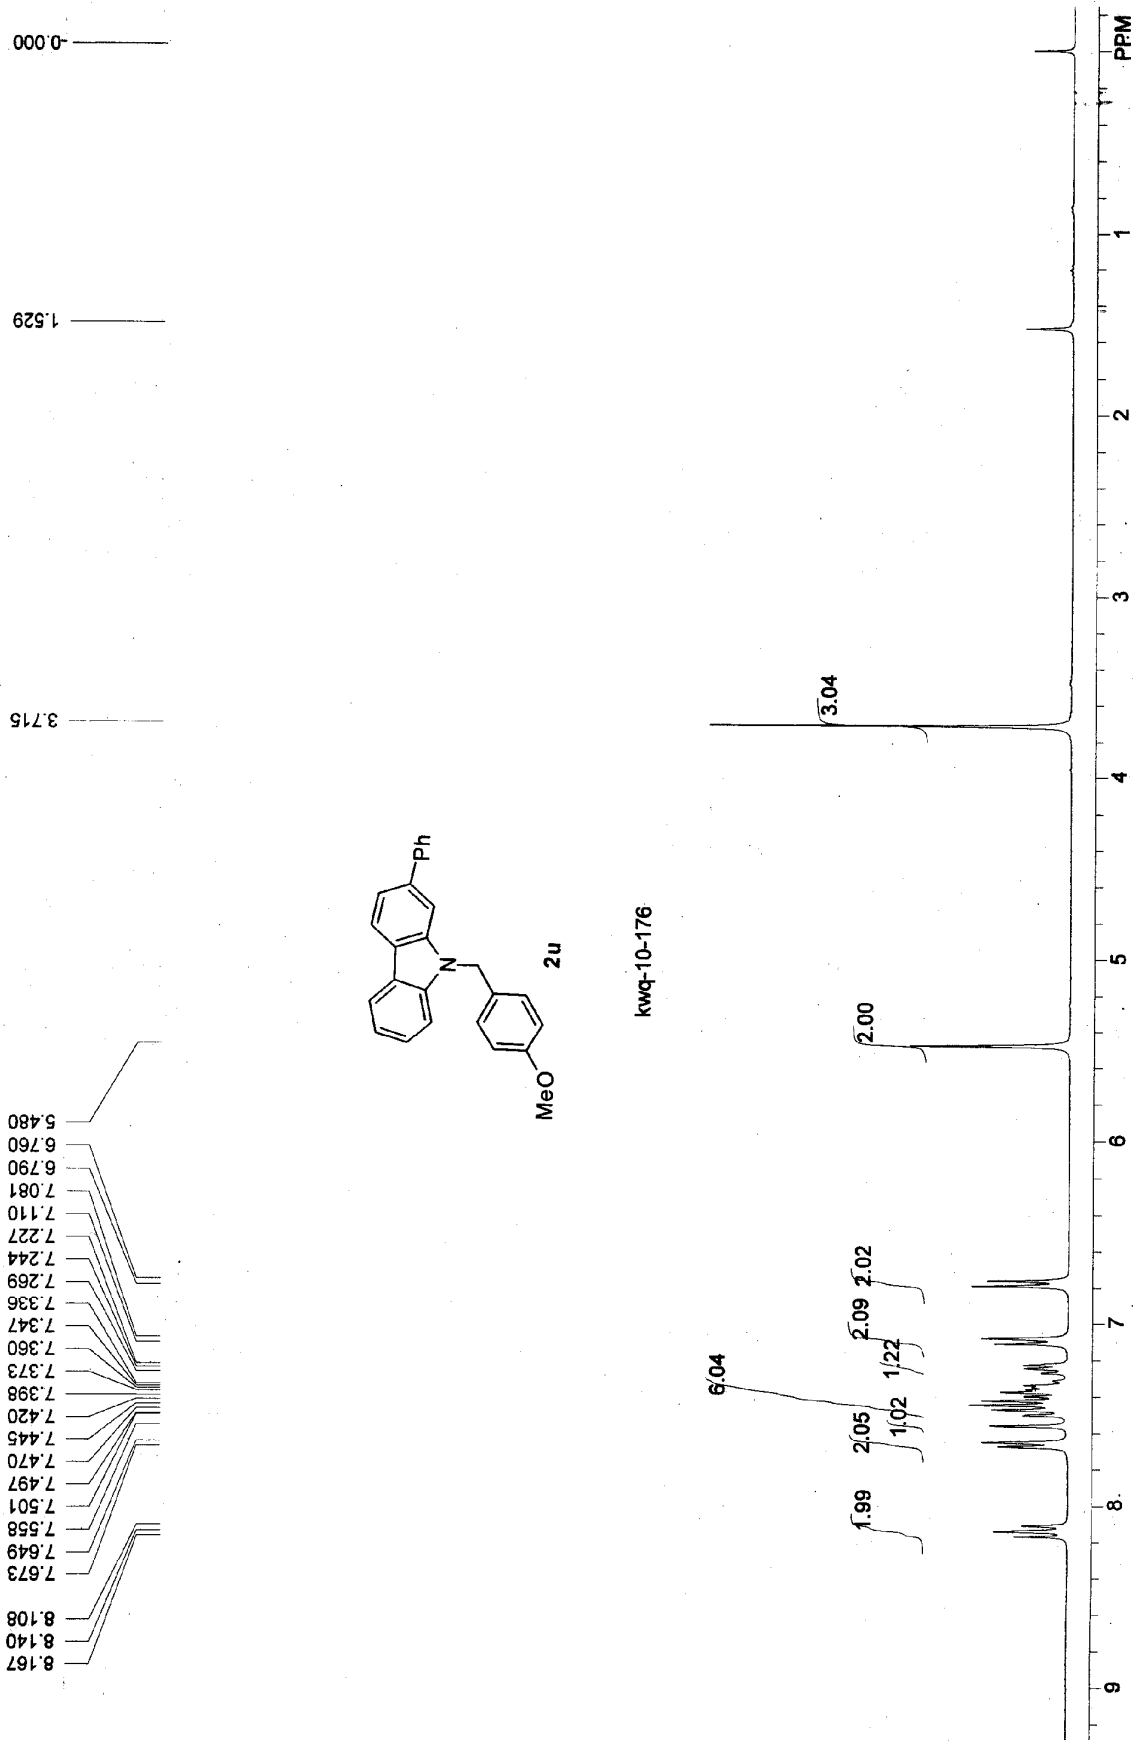

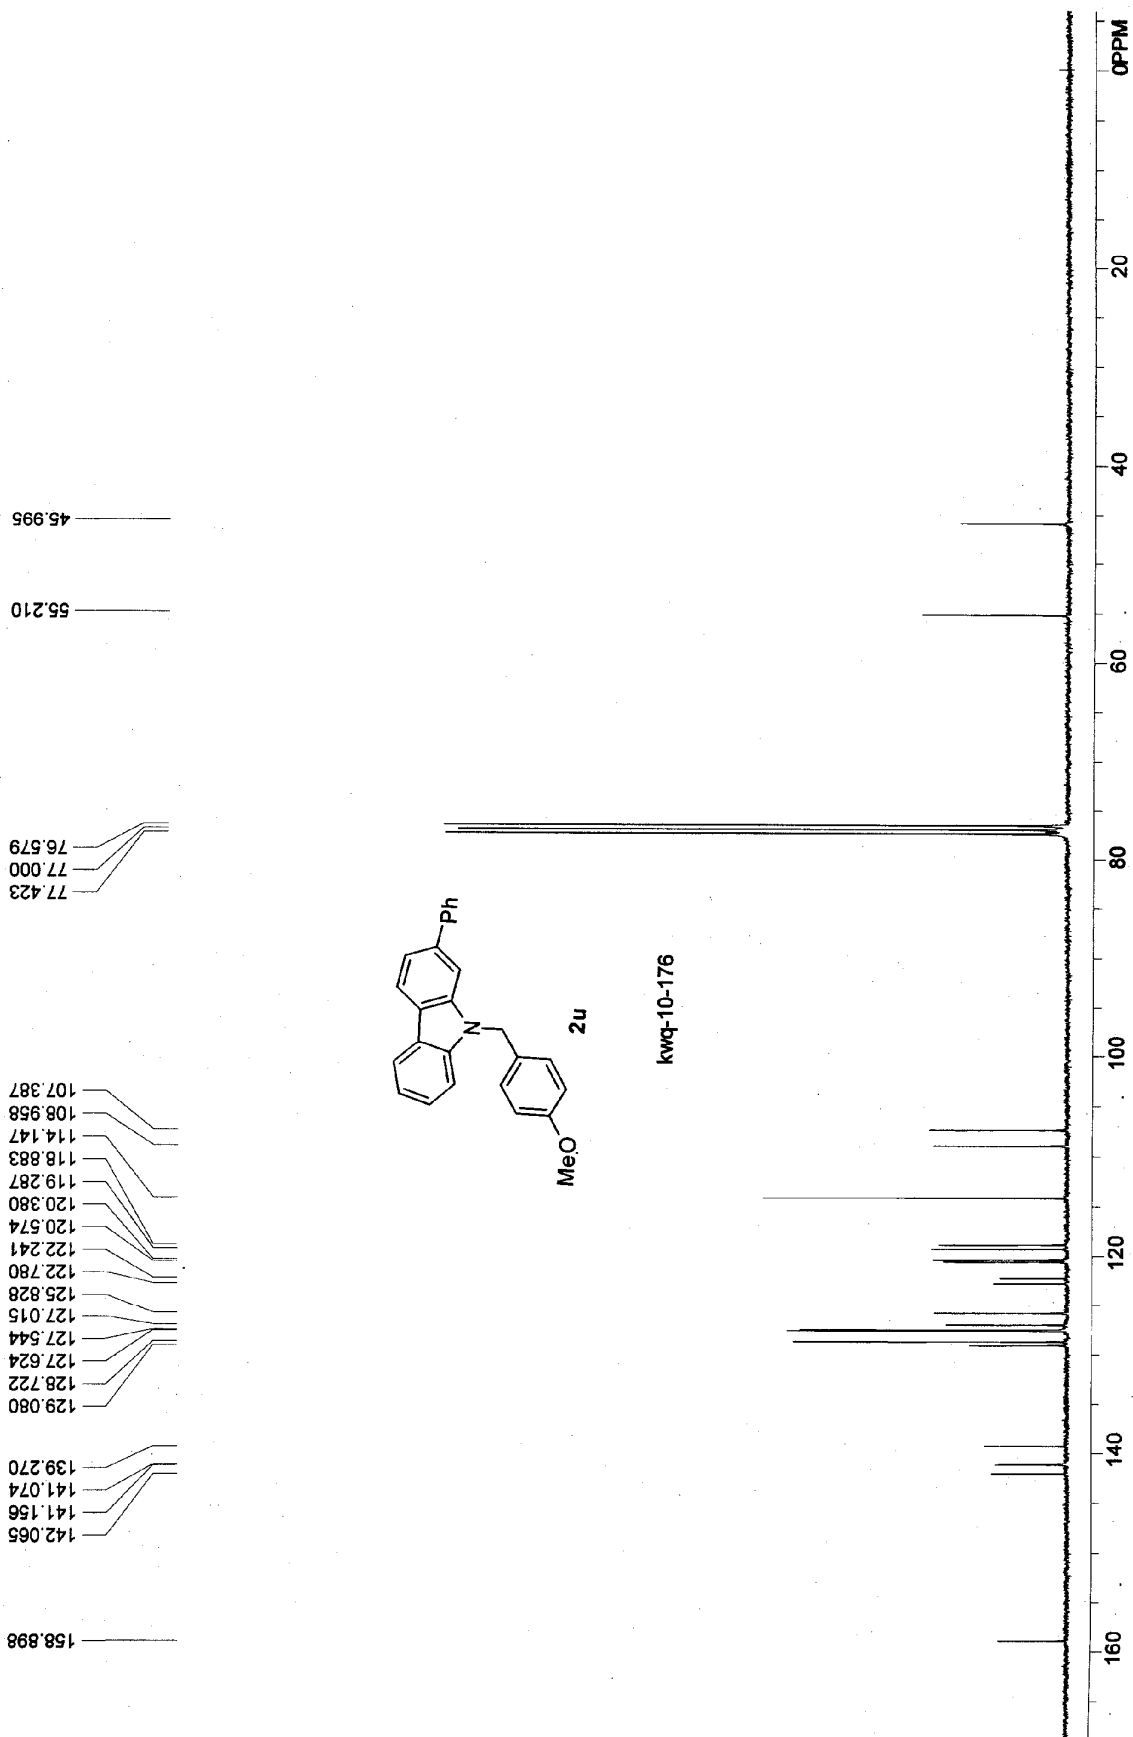



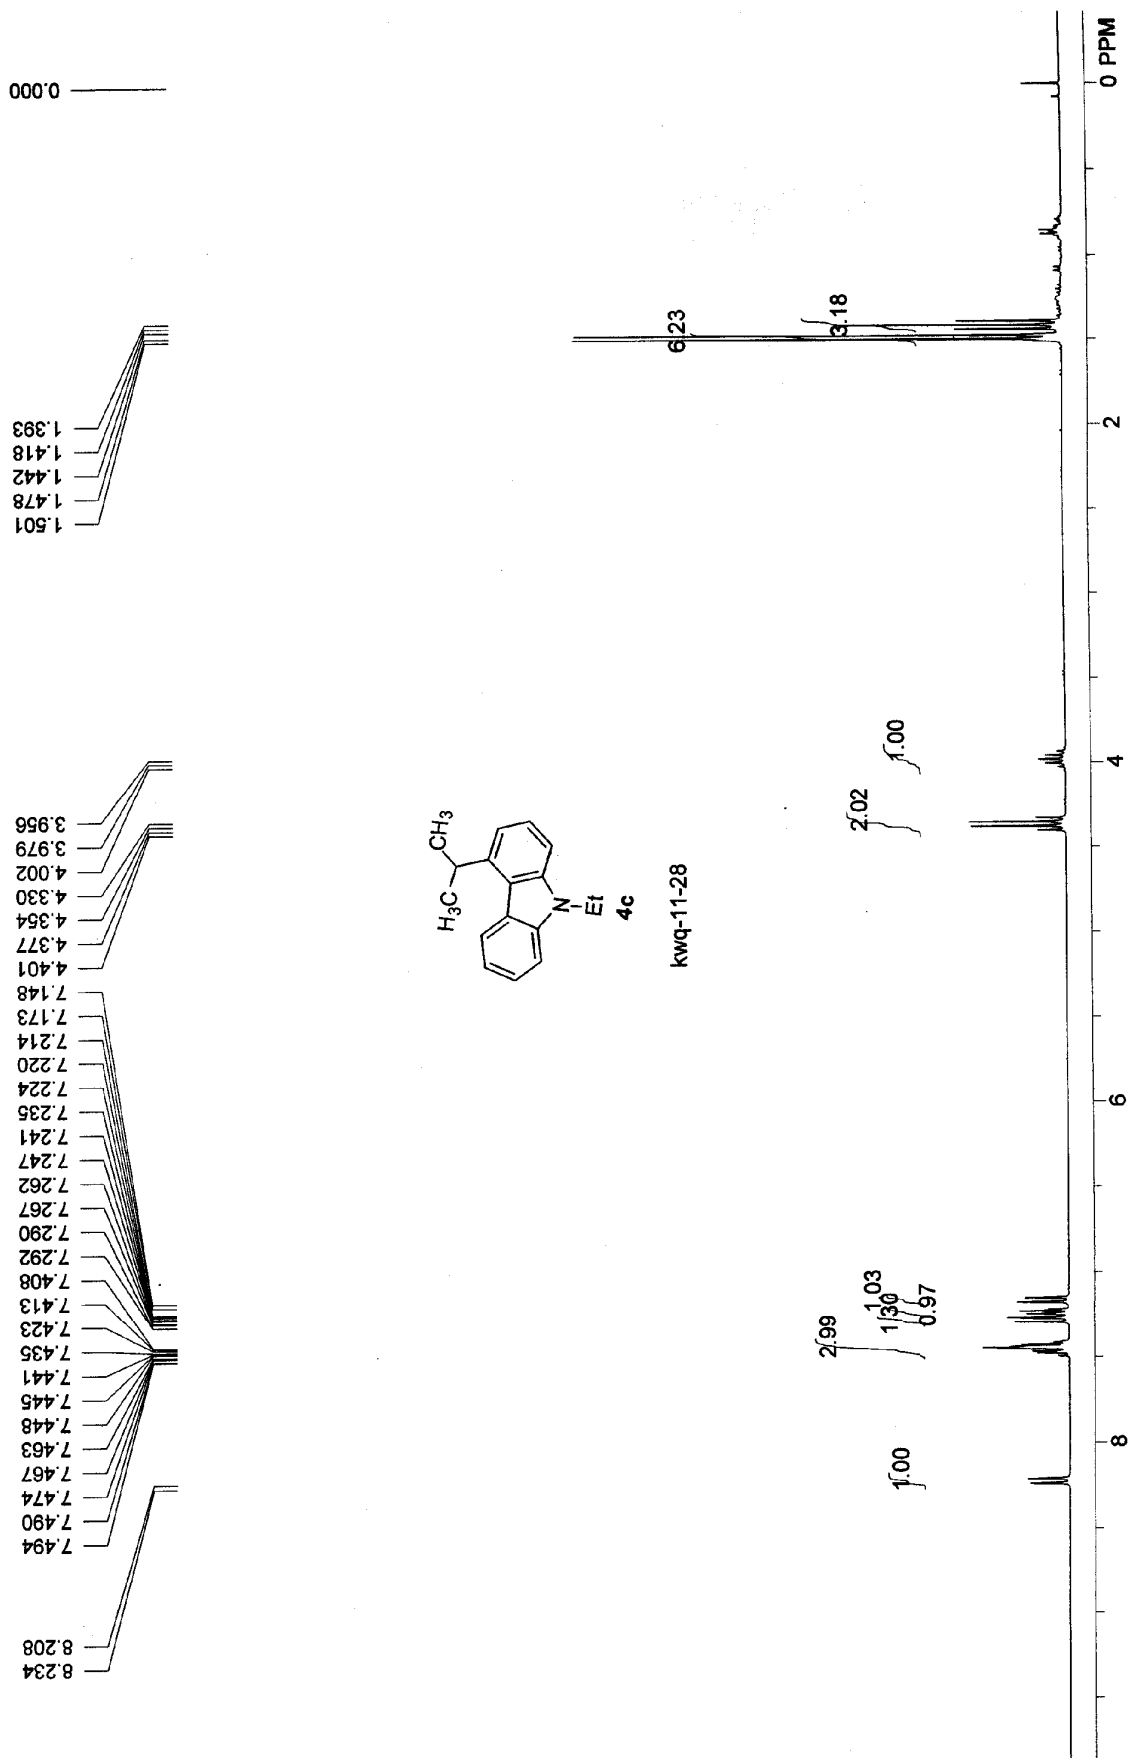

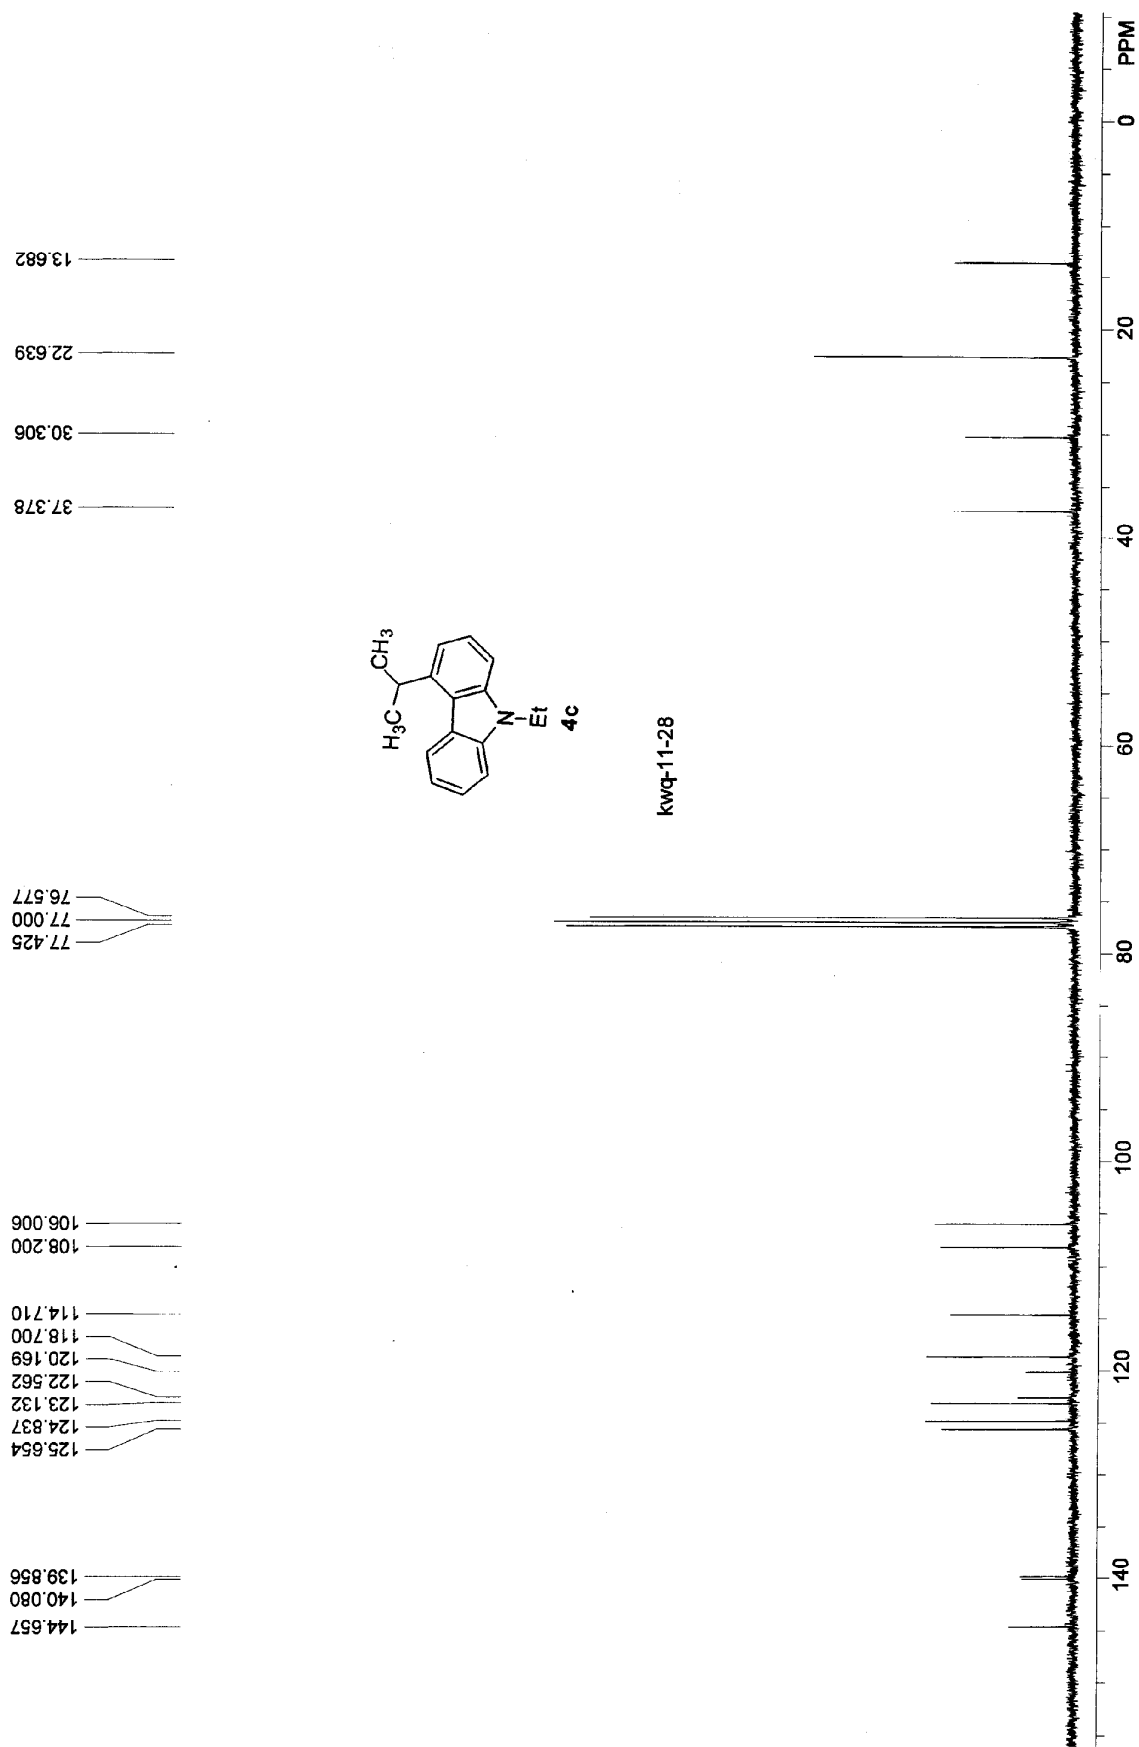

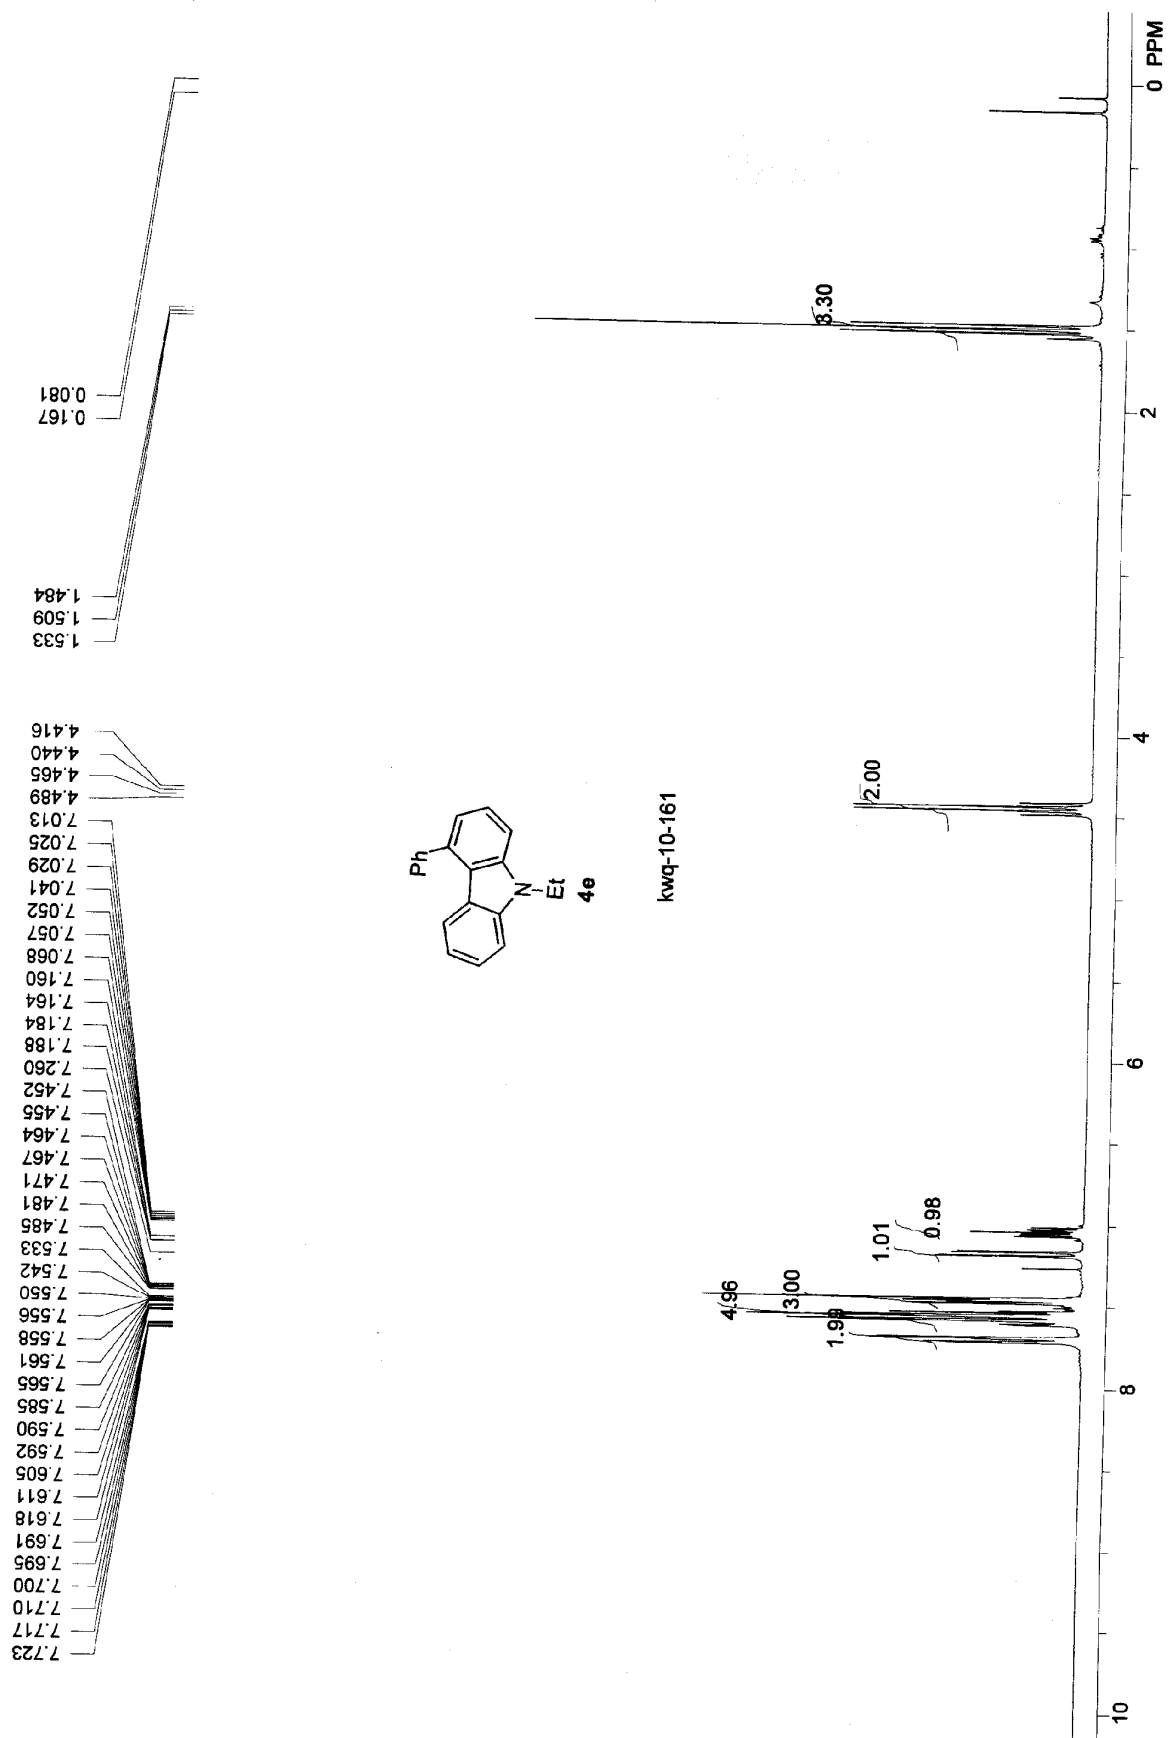

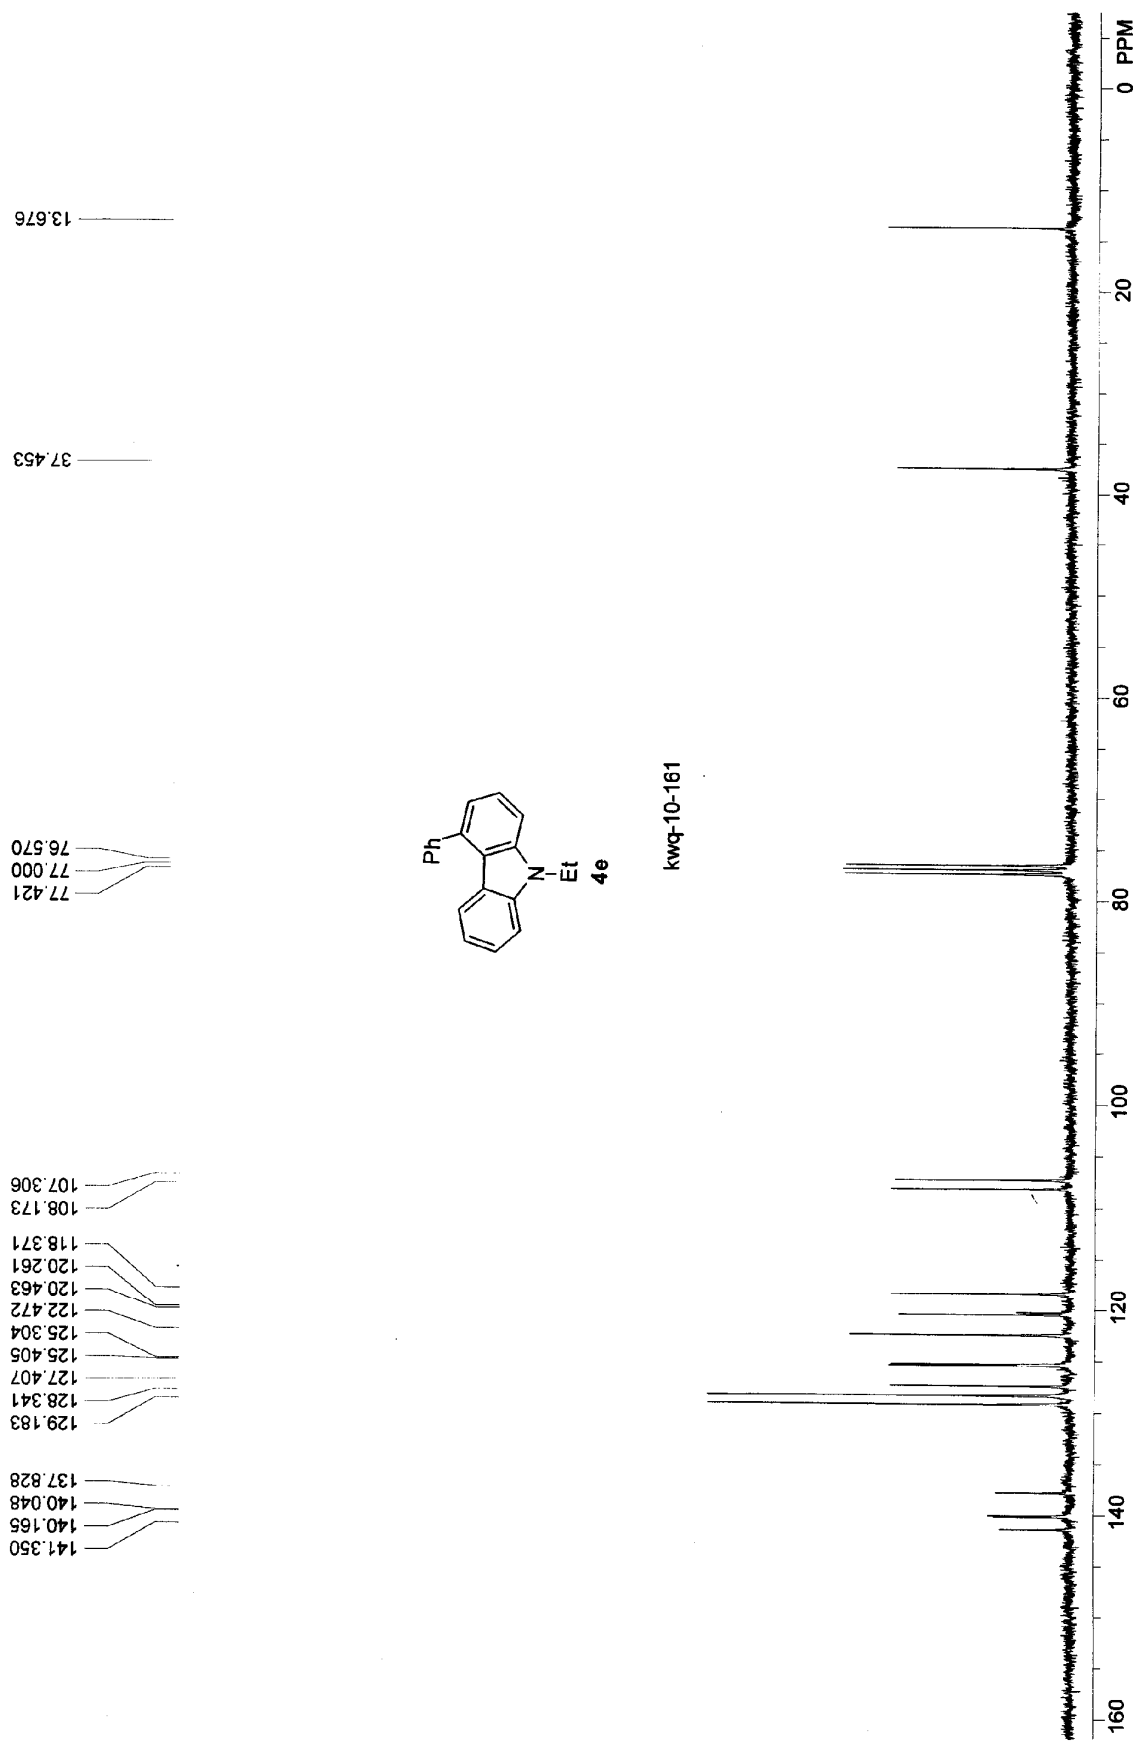

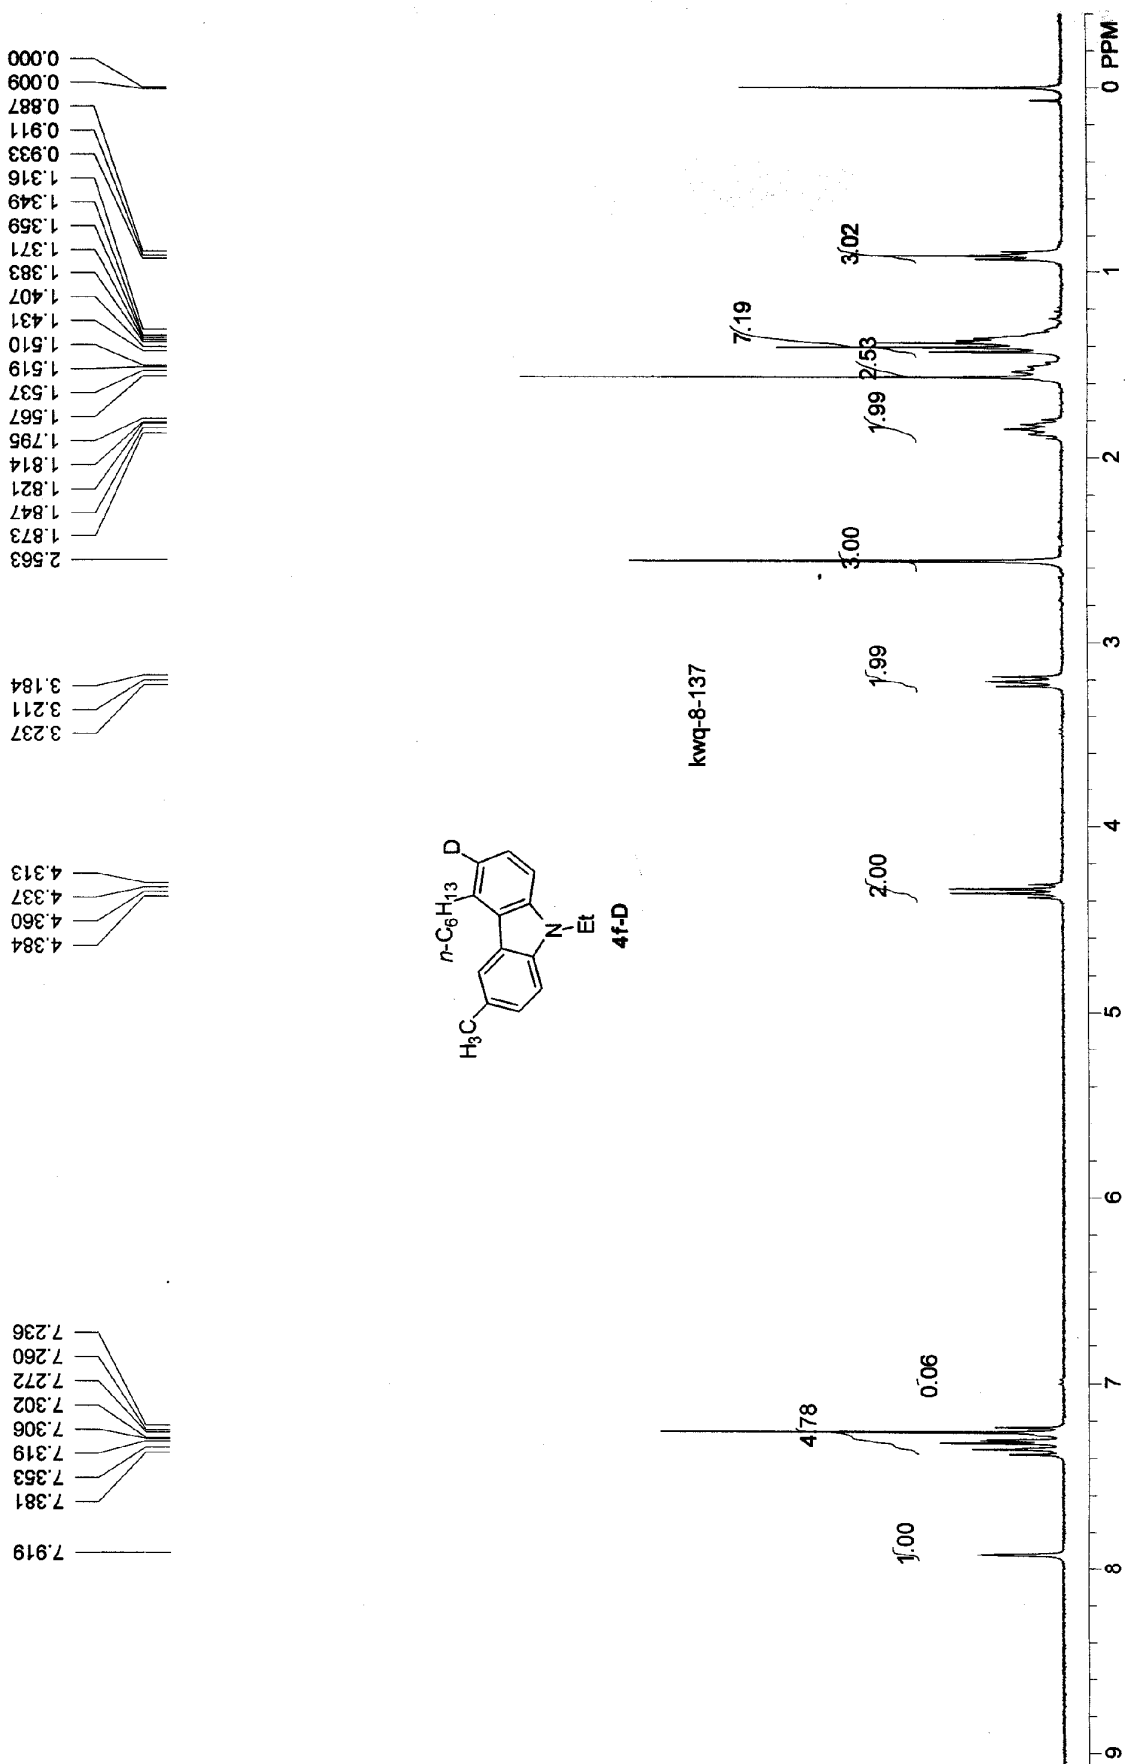

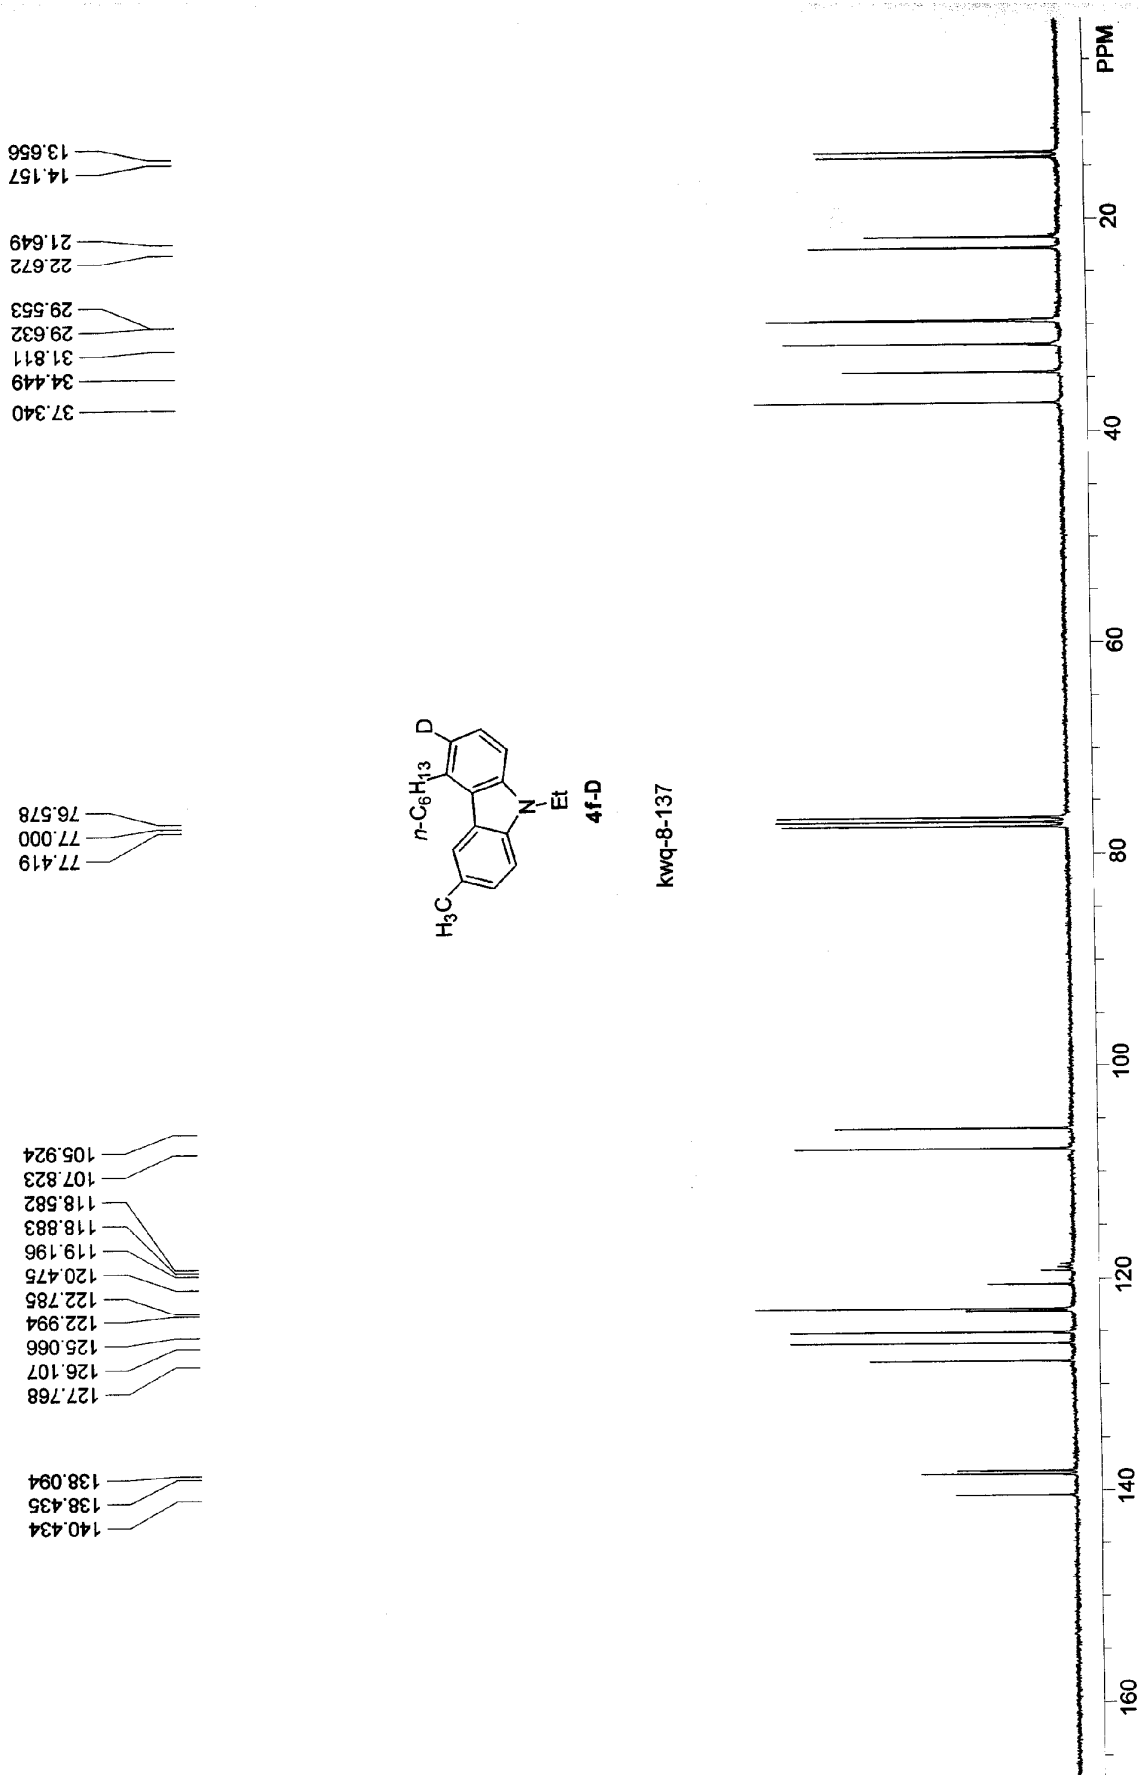

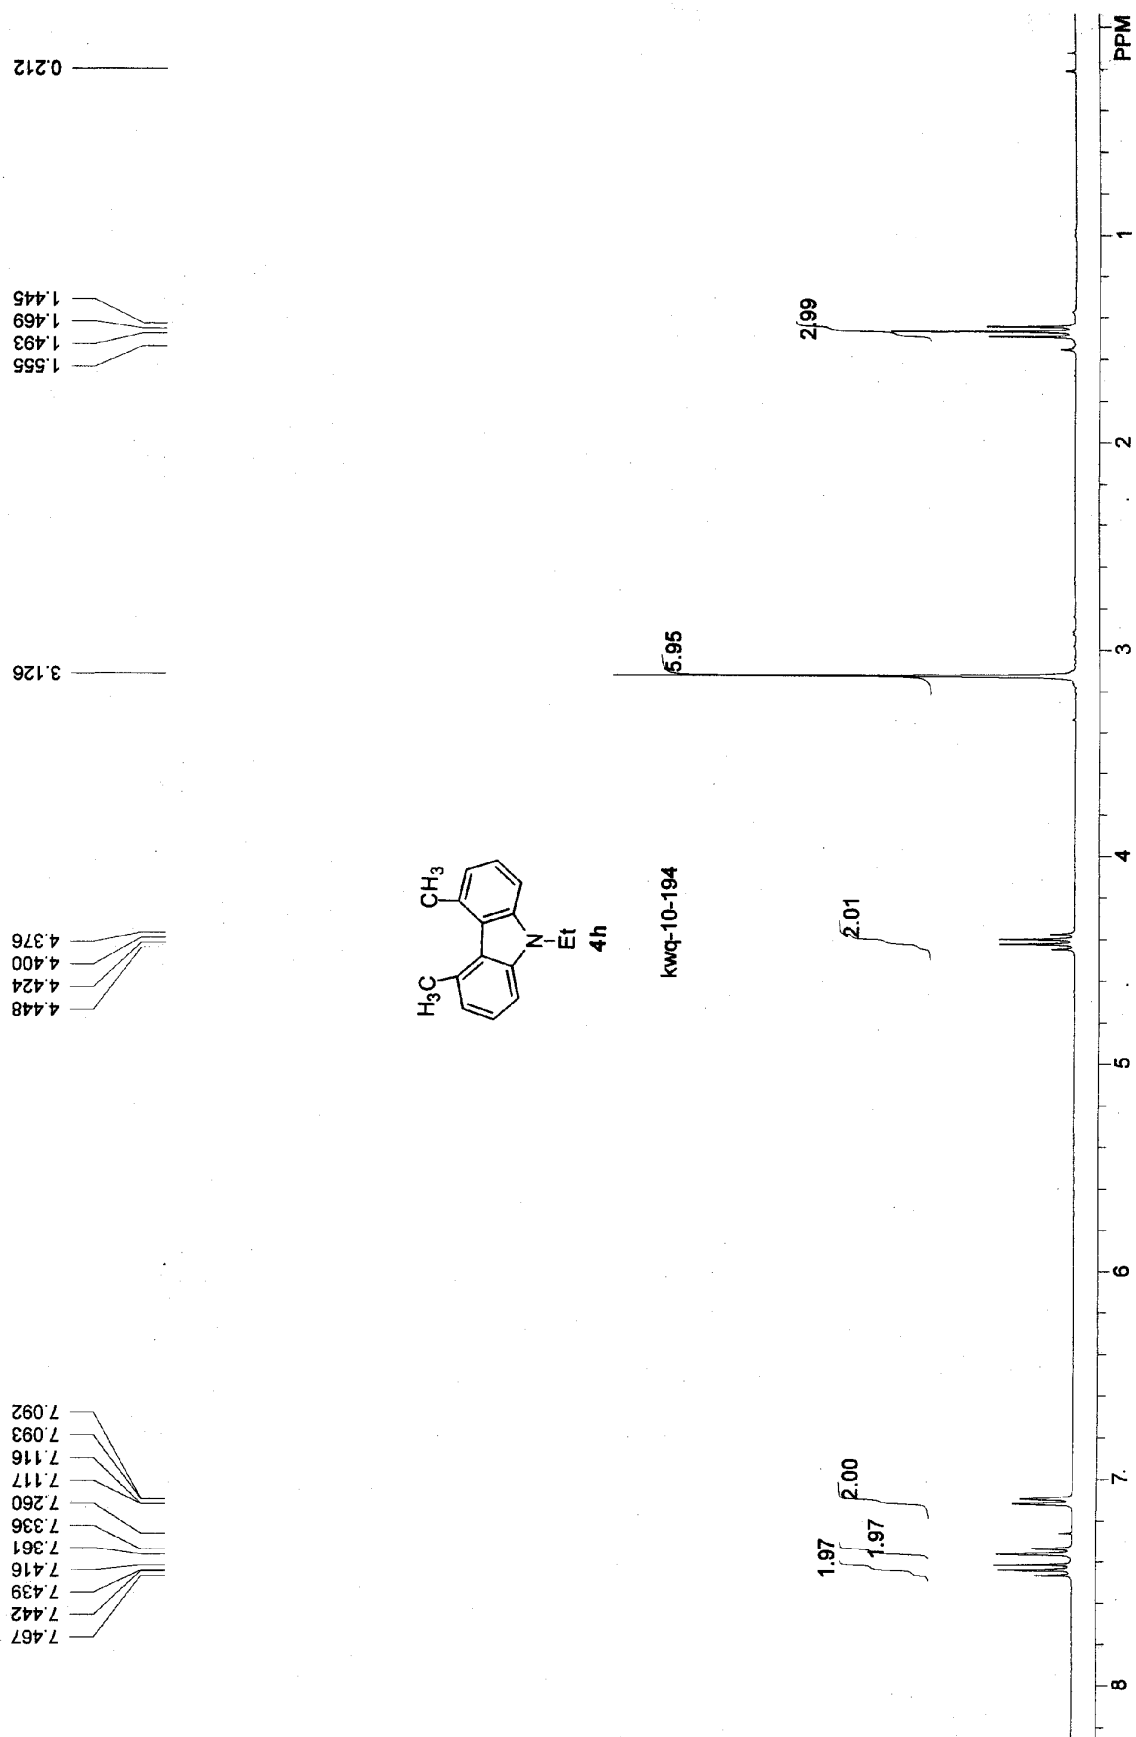

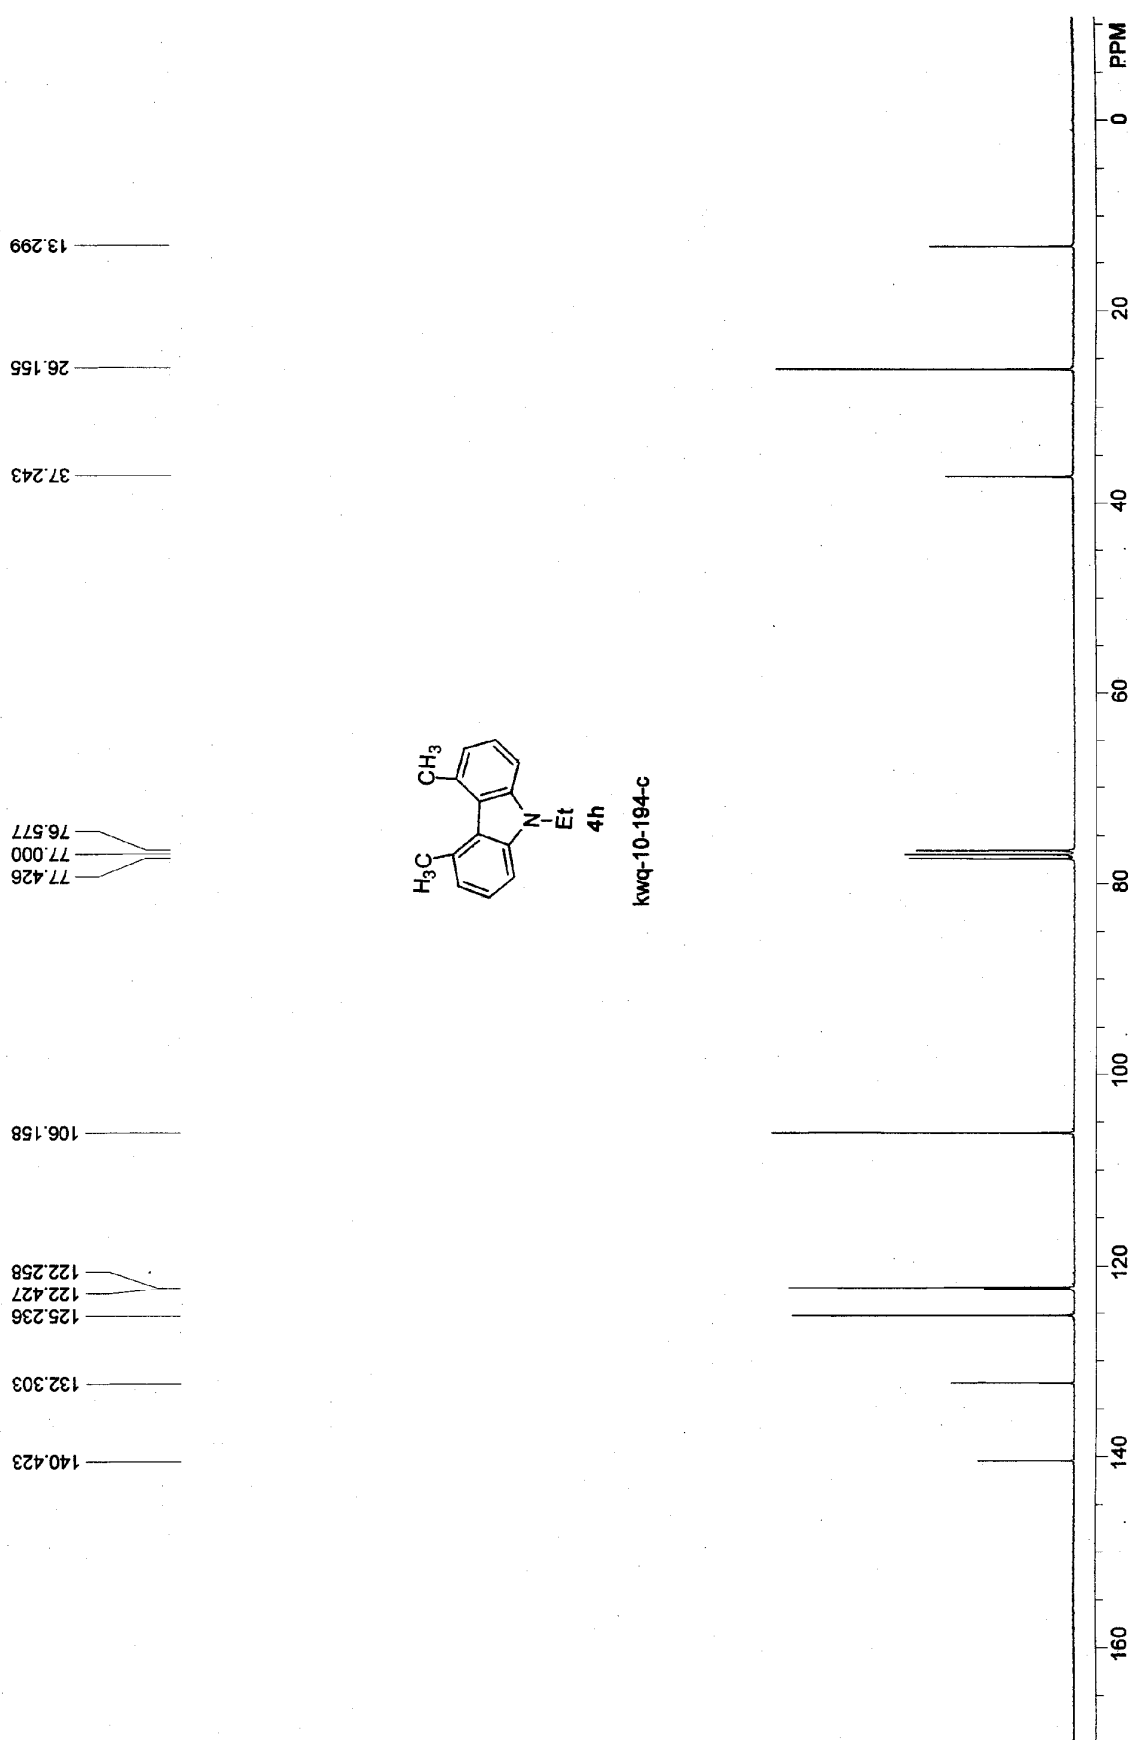



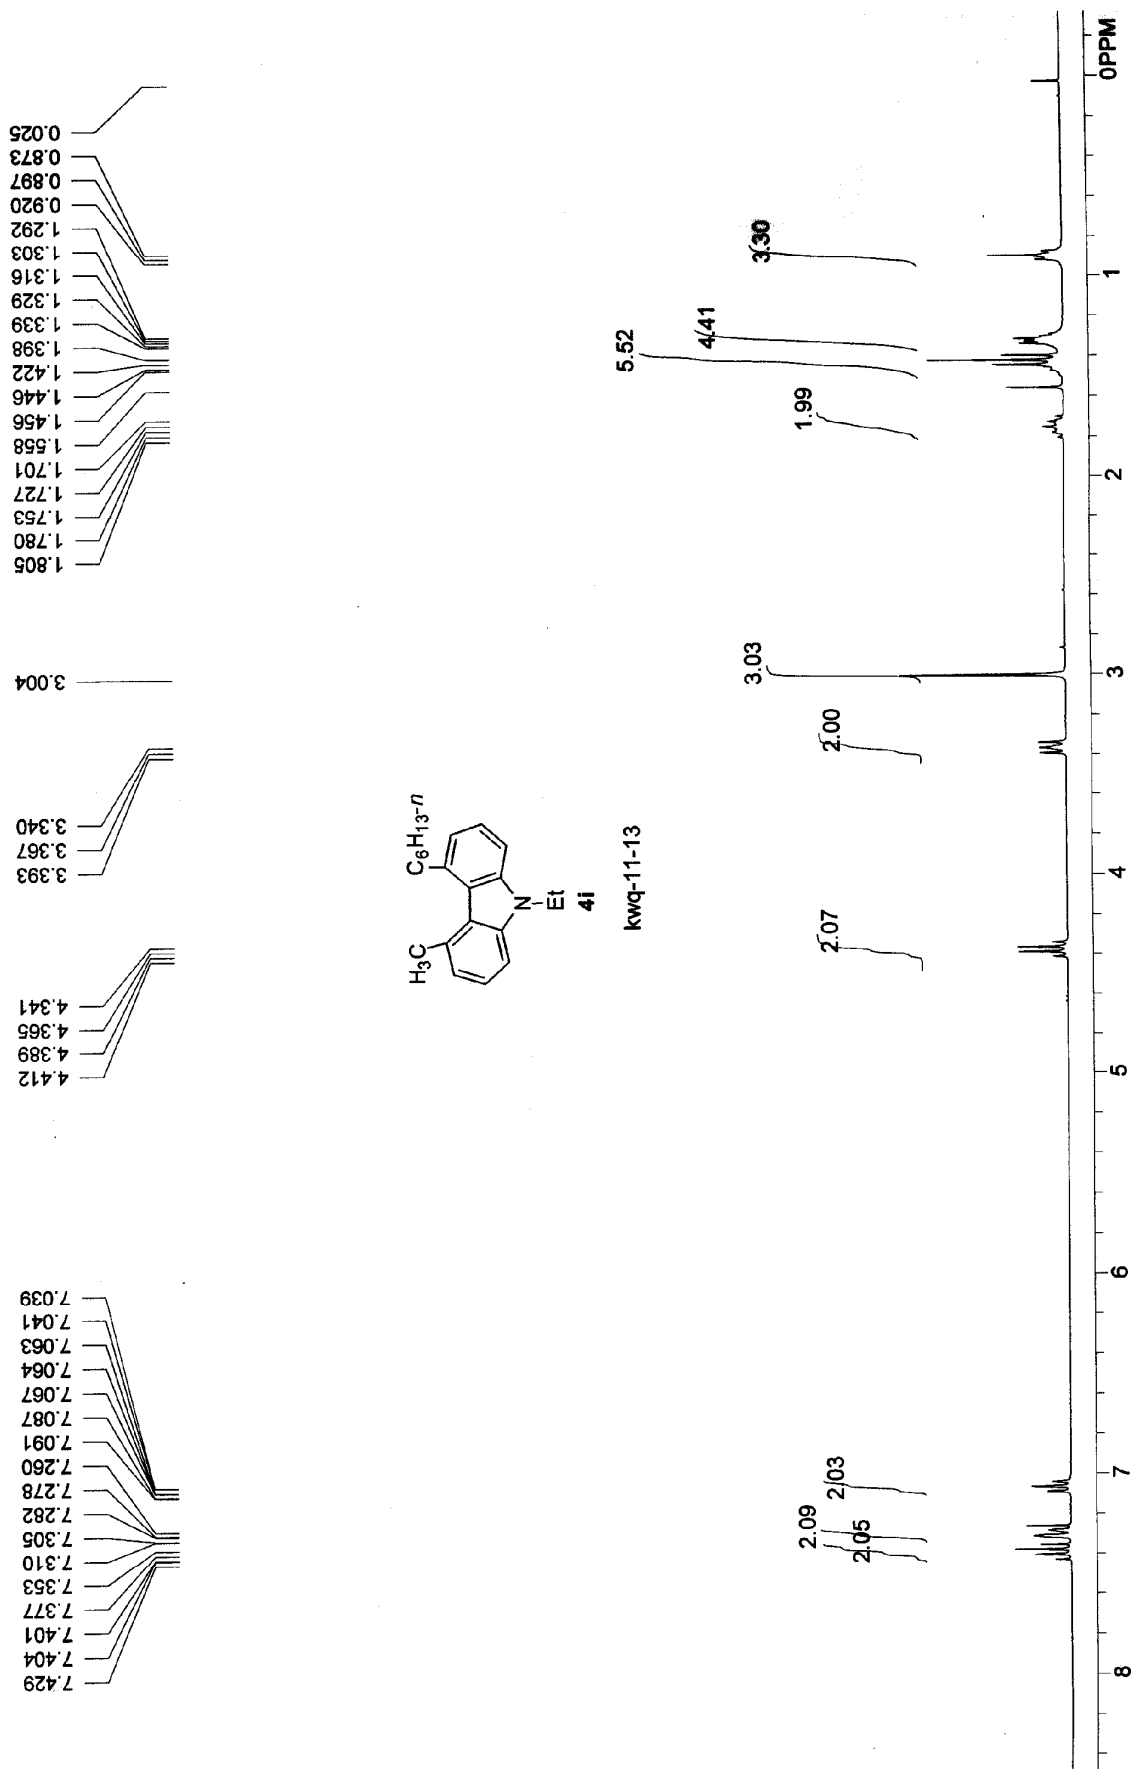

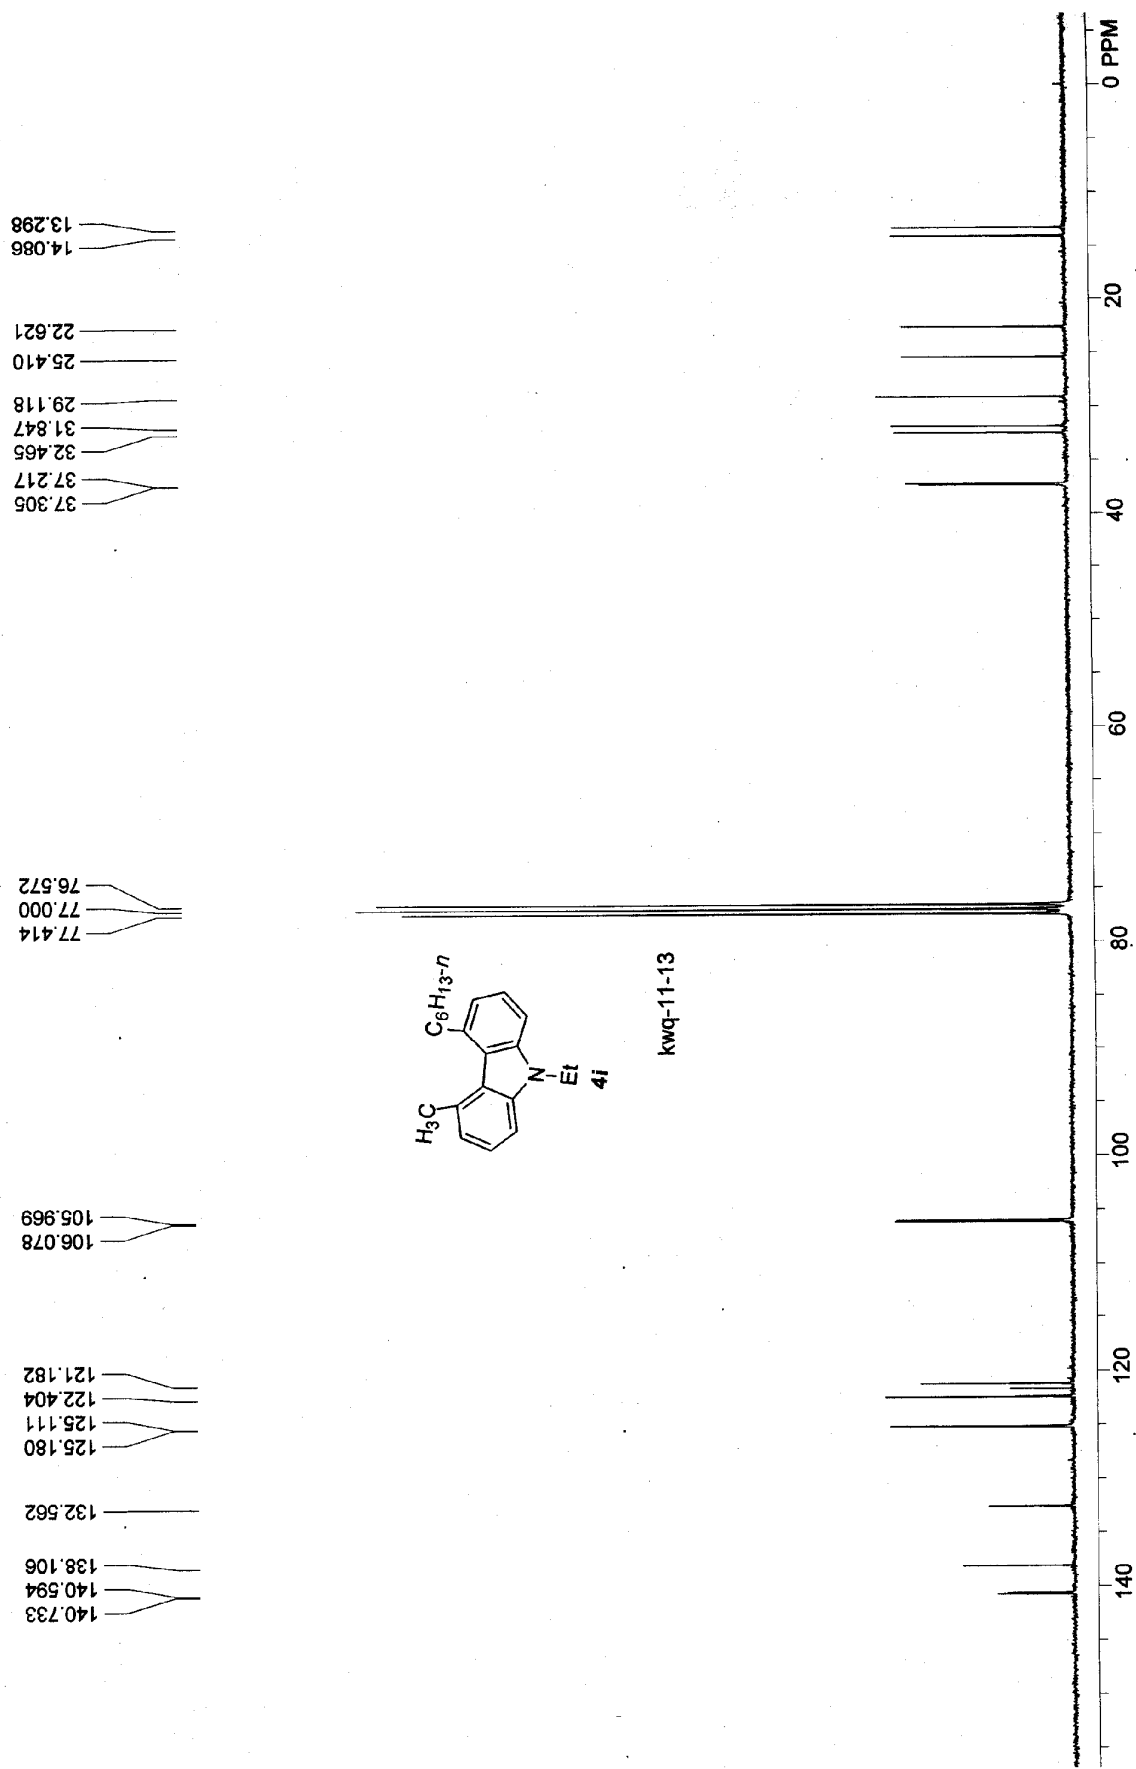

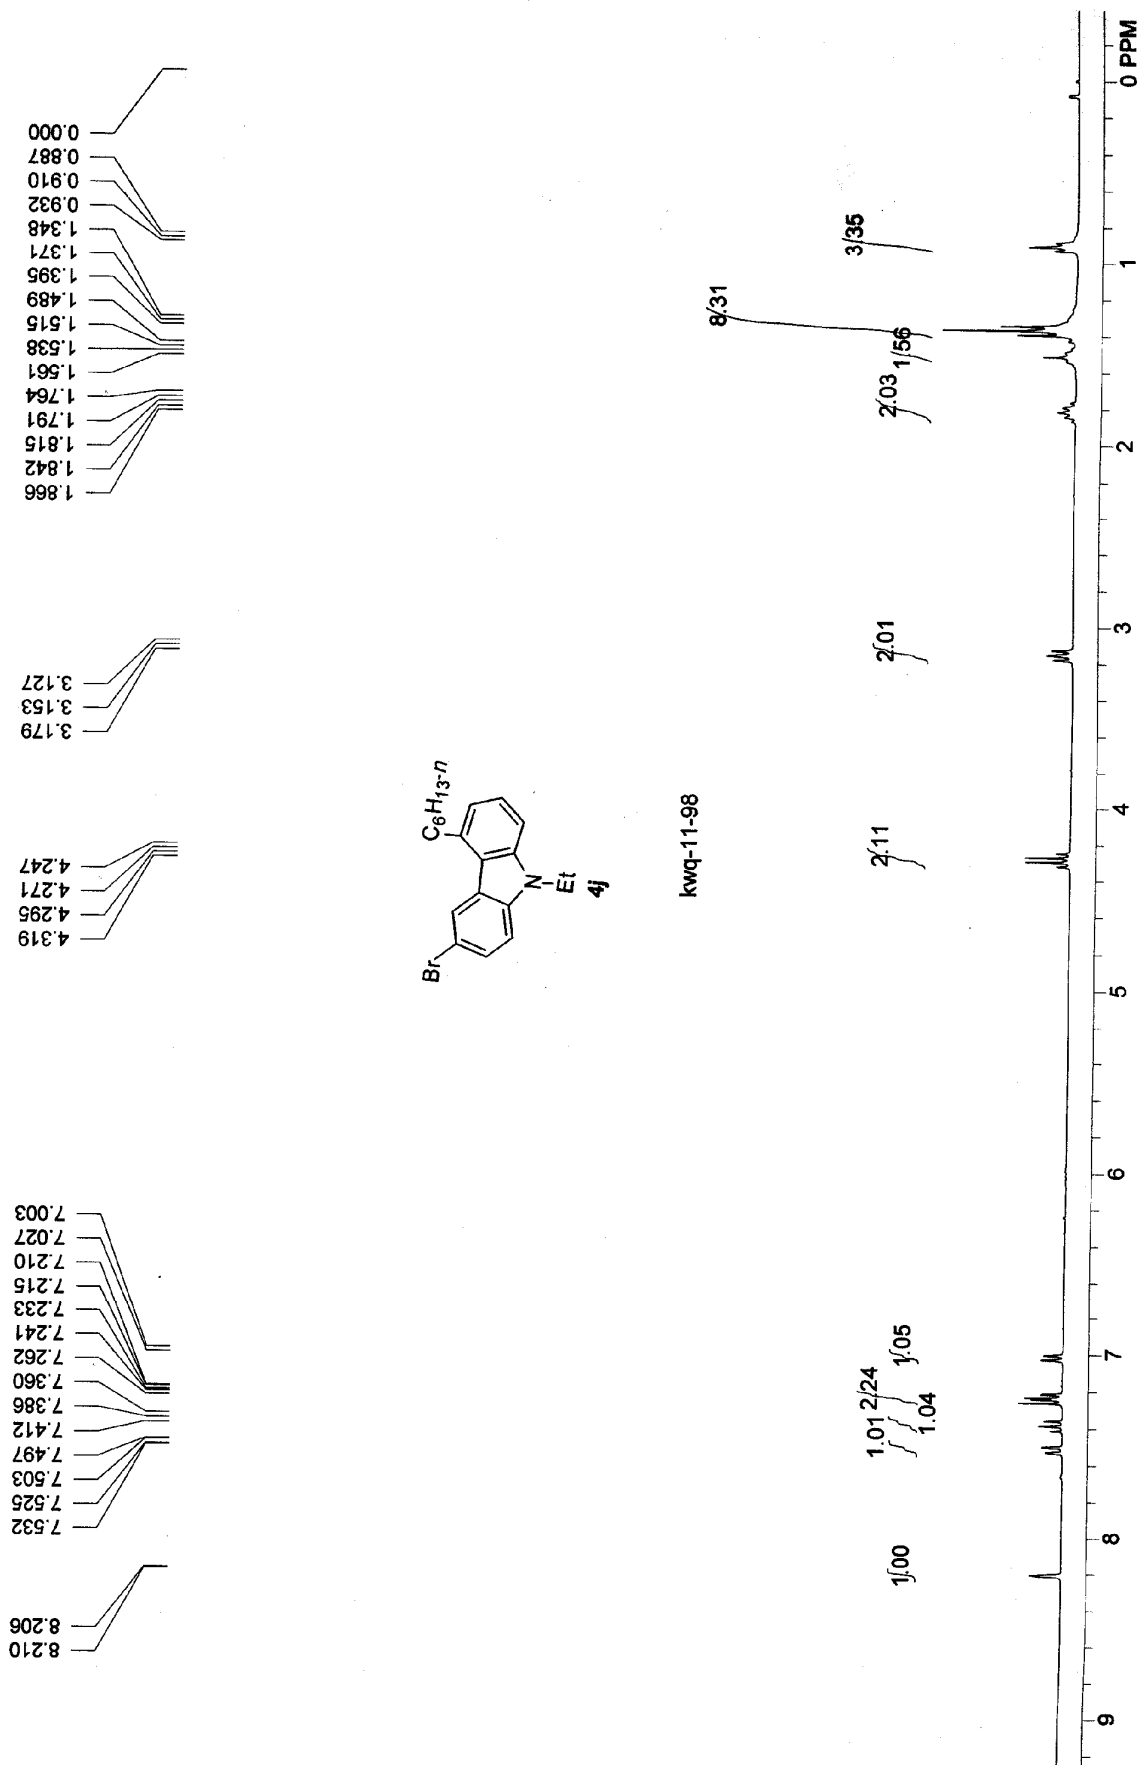

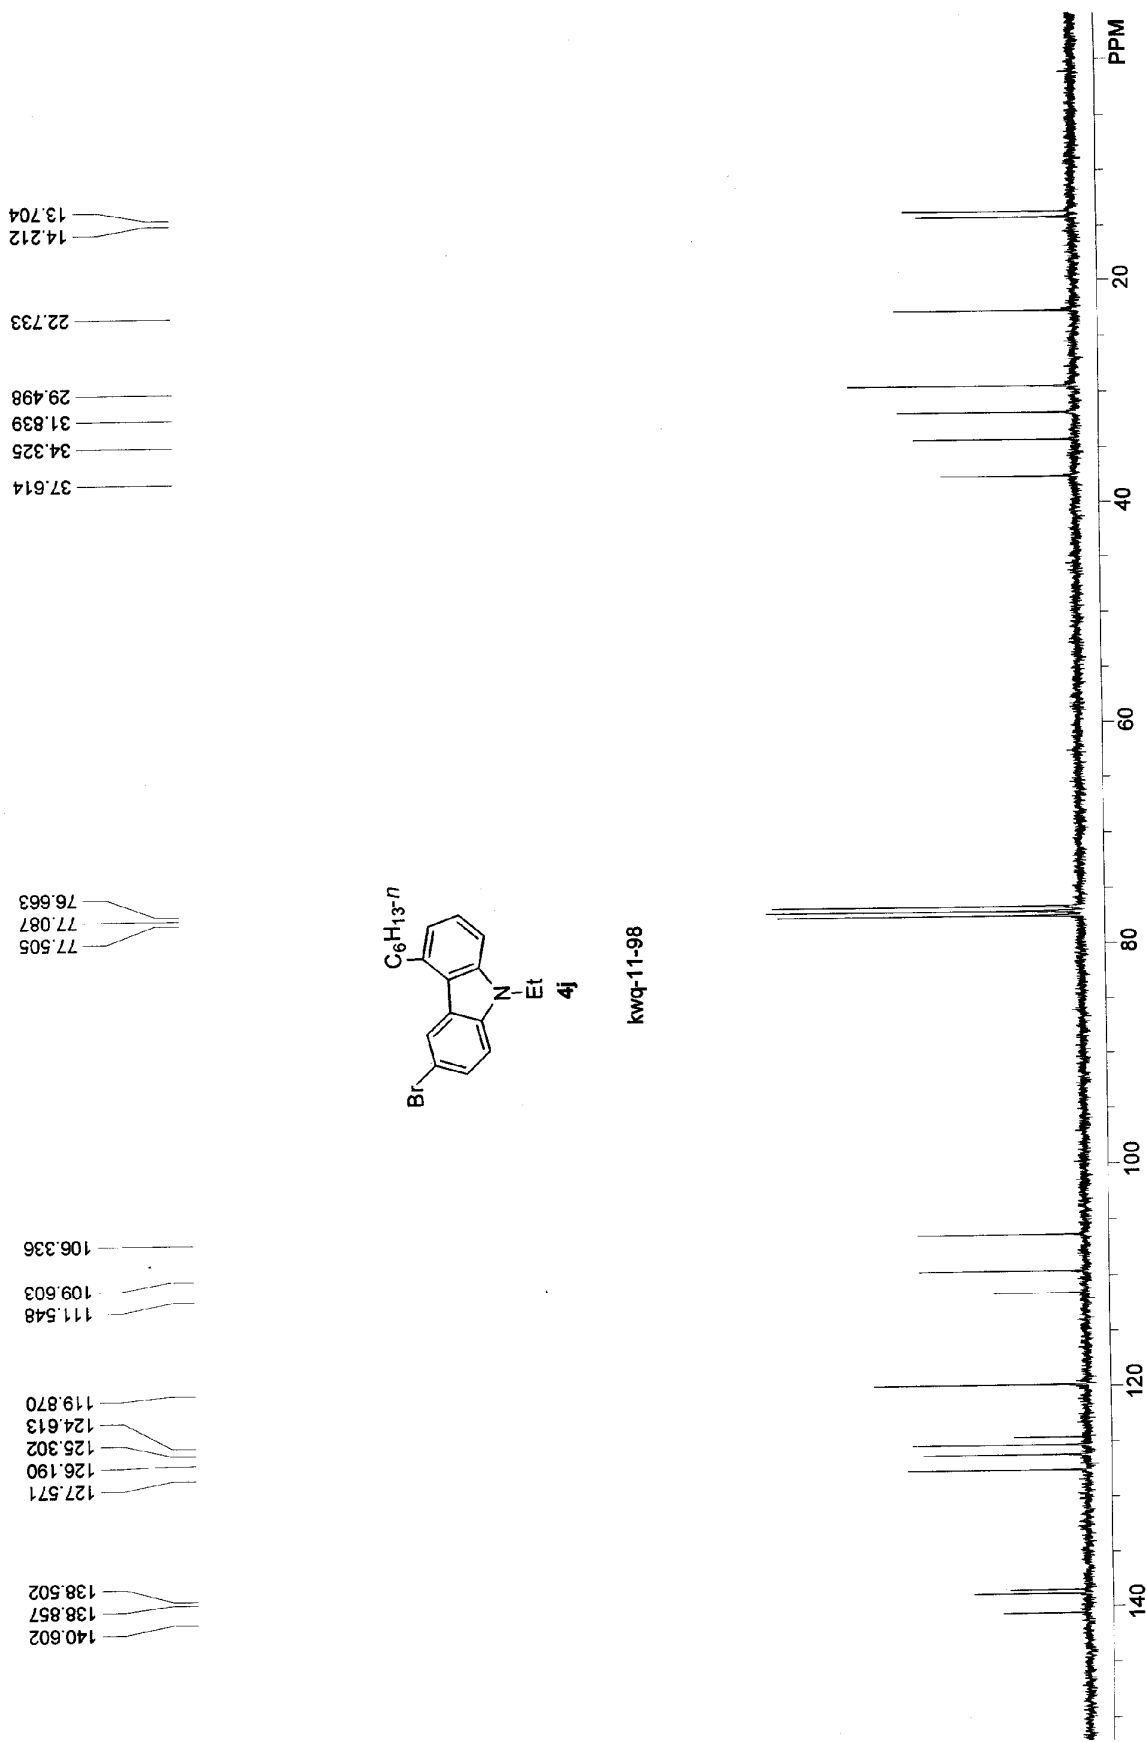

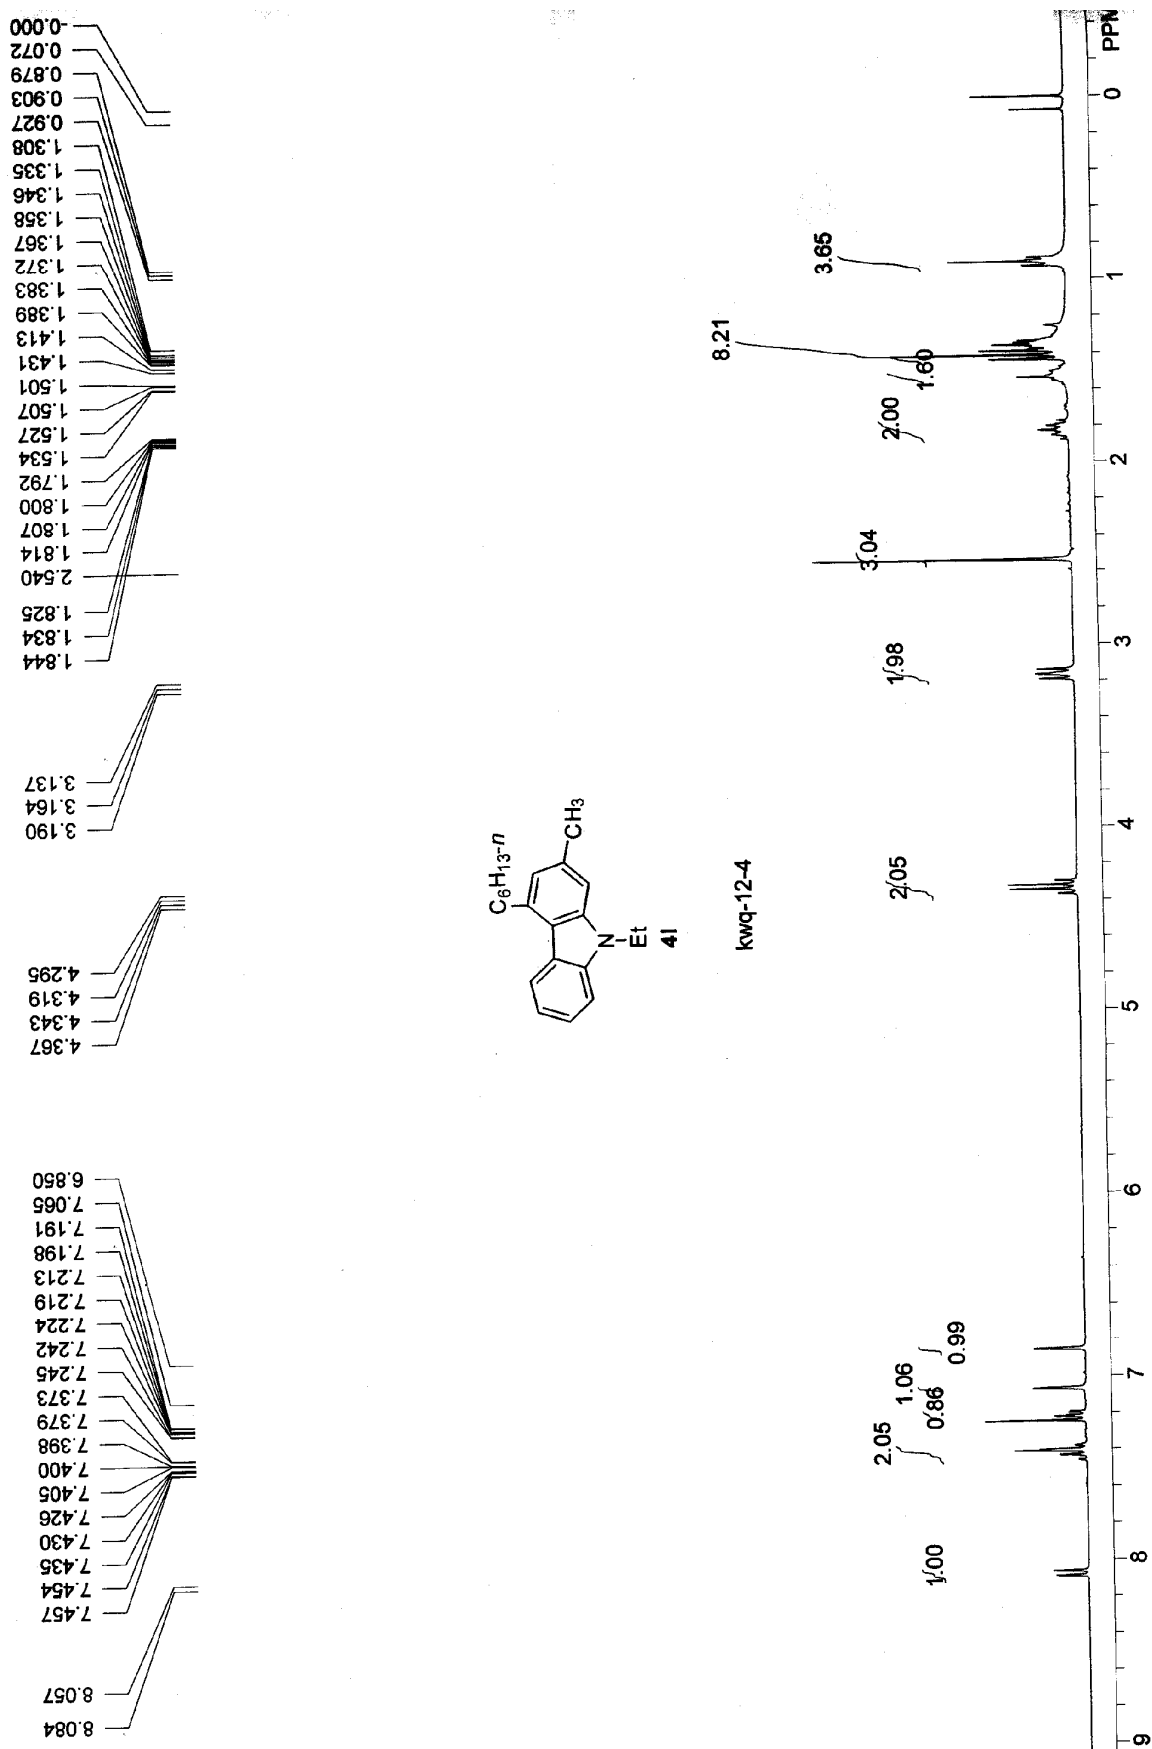

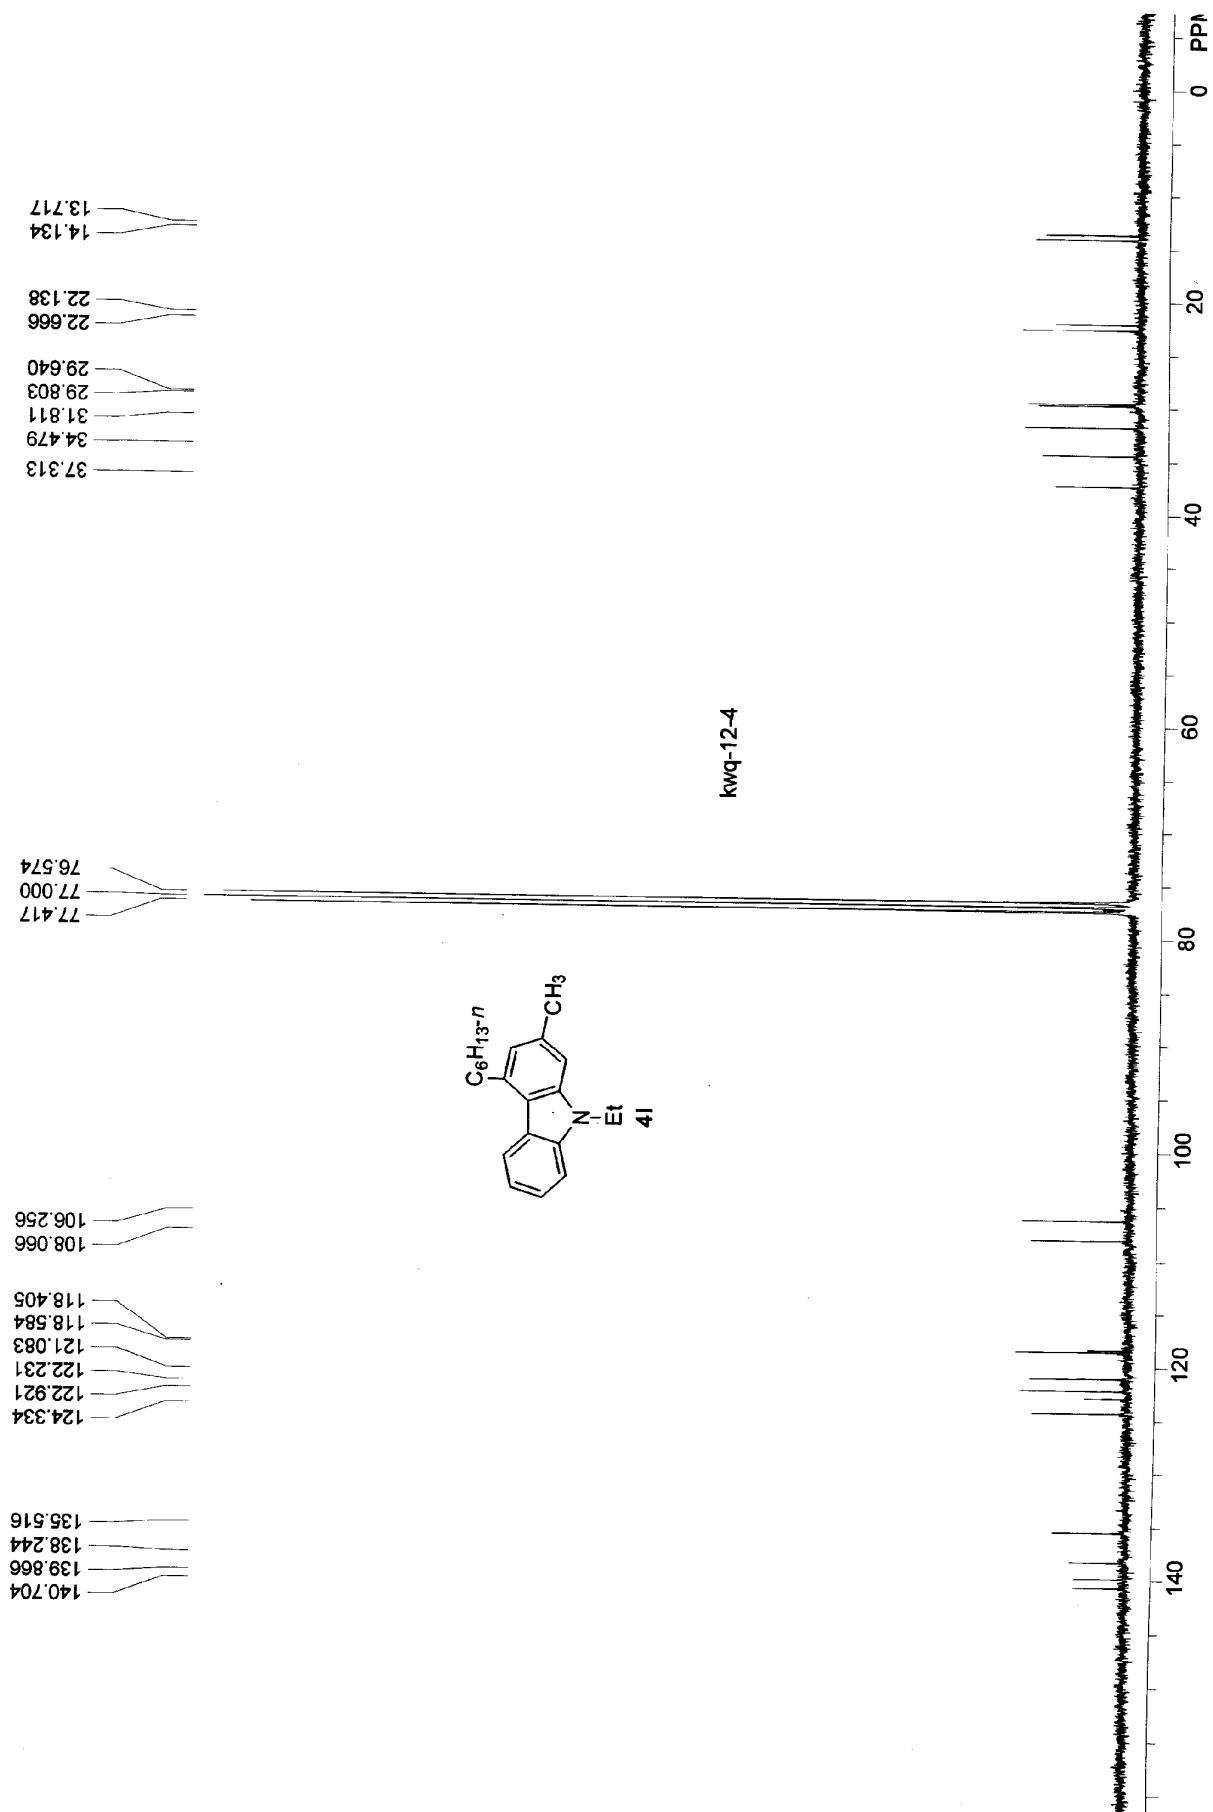

Supplement: c1ob06474f.pdf [file c1ob06474f.pdf]
